# Supplementary material for: Aerosol inhibition on photochemical surface ozone formation under future climate and air quality scenarios
Source: Research Square preprint supplement (doi:10.21203/rs.3.rs-5932296/v1), 2025-02-04
Supplement: Supplementary file 1 [file 5e6b479202e30e51496c7c7d.docx]

**SUPPLEMENTARY INFORMATION**

**Aerosol inhibition on photochemical surface ozone formation under future climate and air quality scenarios**

**G S Gopikrishnan1,2, D. M. Westervelt2,* and J. Kuttippurath1**

*1 CORAL, Indian Institute of Technology Kharagpur, Kharagpur–721302, India.*

*2* *Lamont‐Doherty Earth Observatory, Columbia University, New York - 10964, NY, USA*

** To whom correspondence should be addressed. Email: danielmw@ldeo.columbia.edu*

**
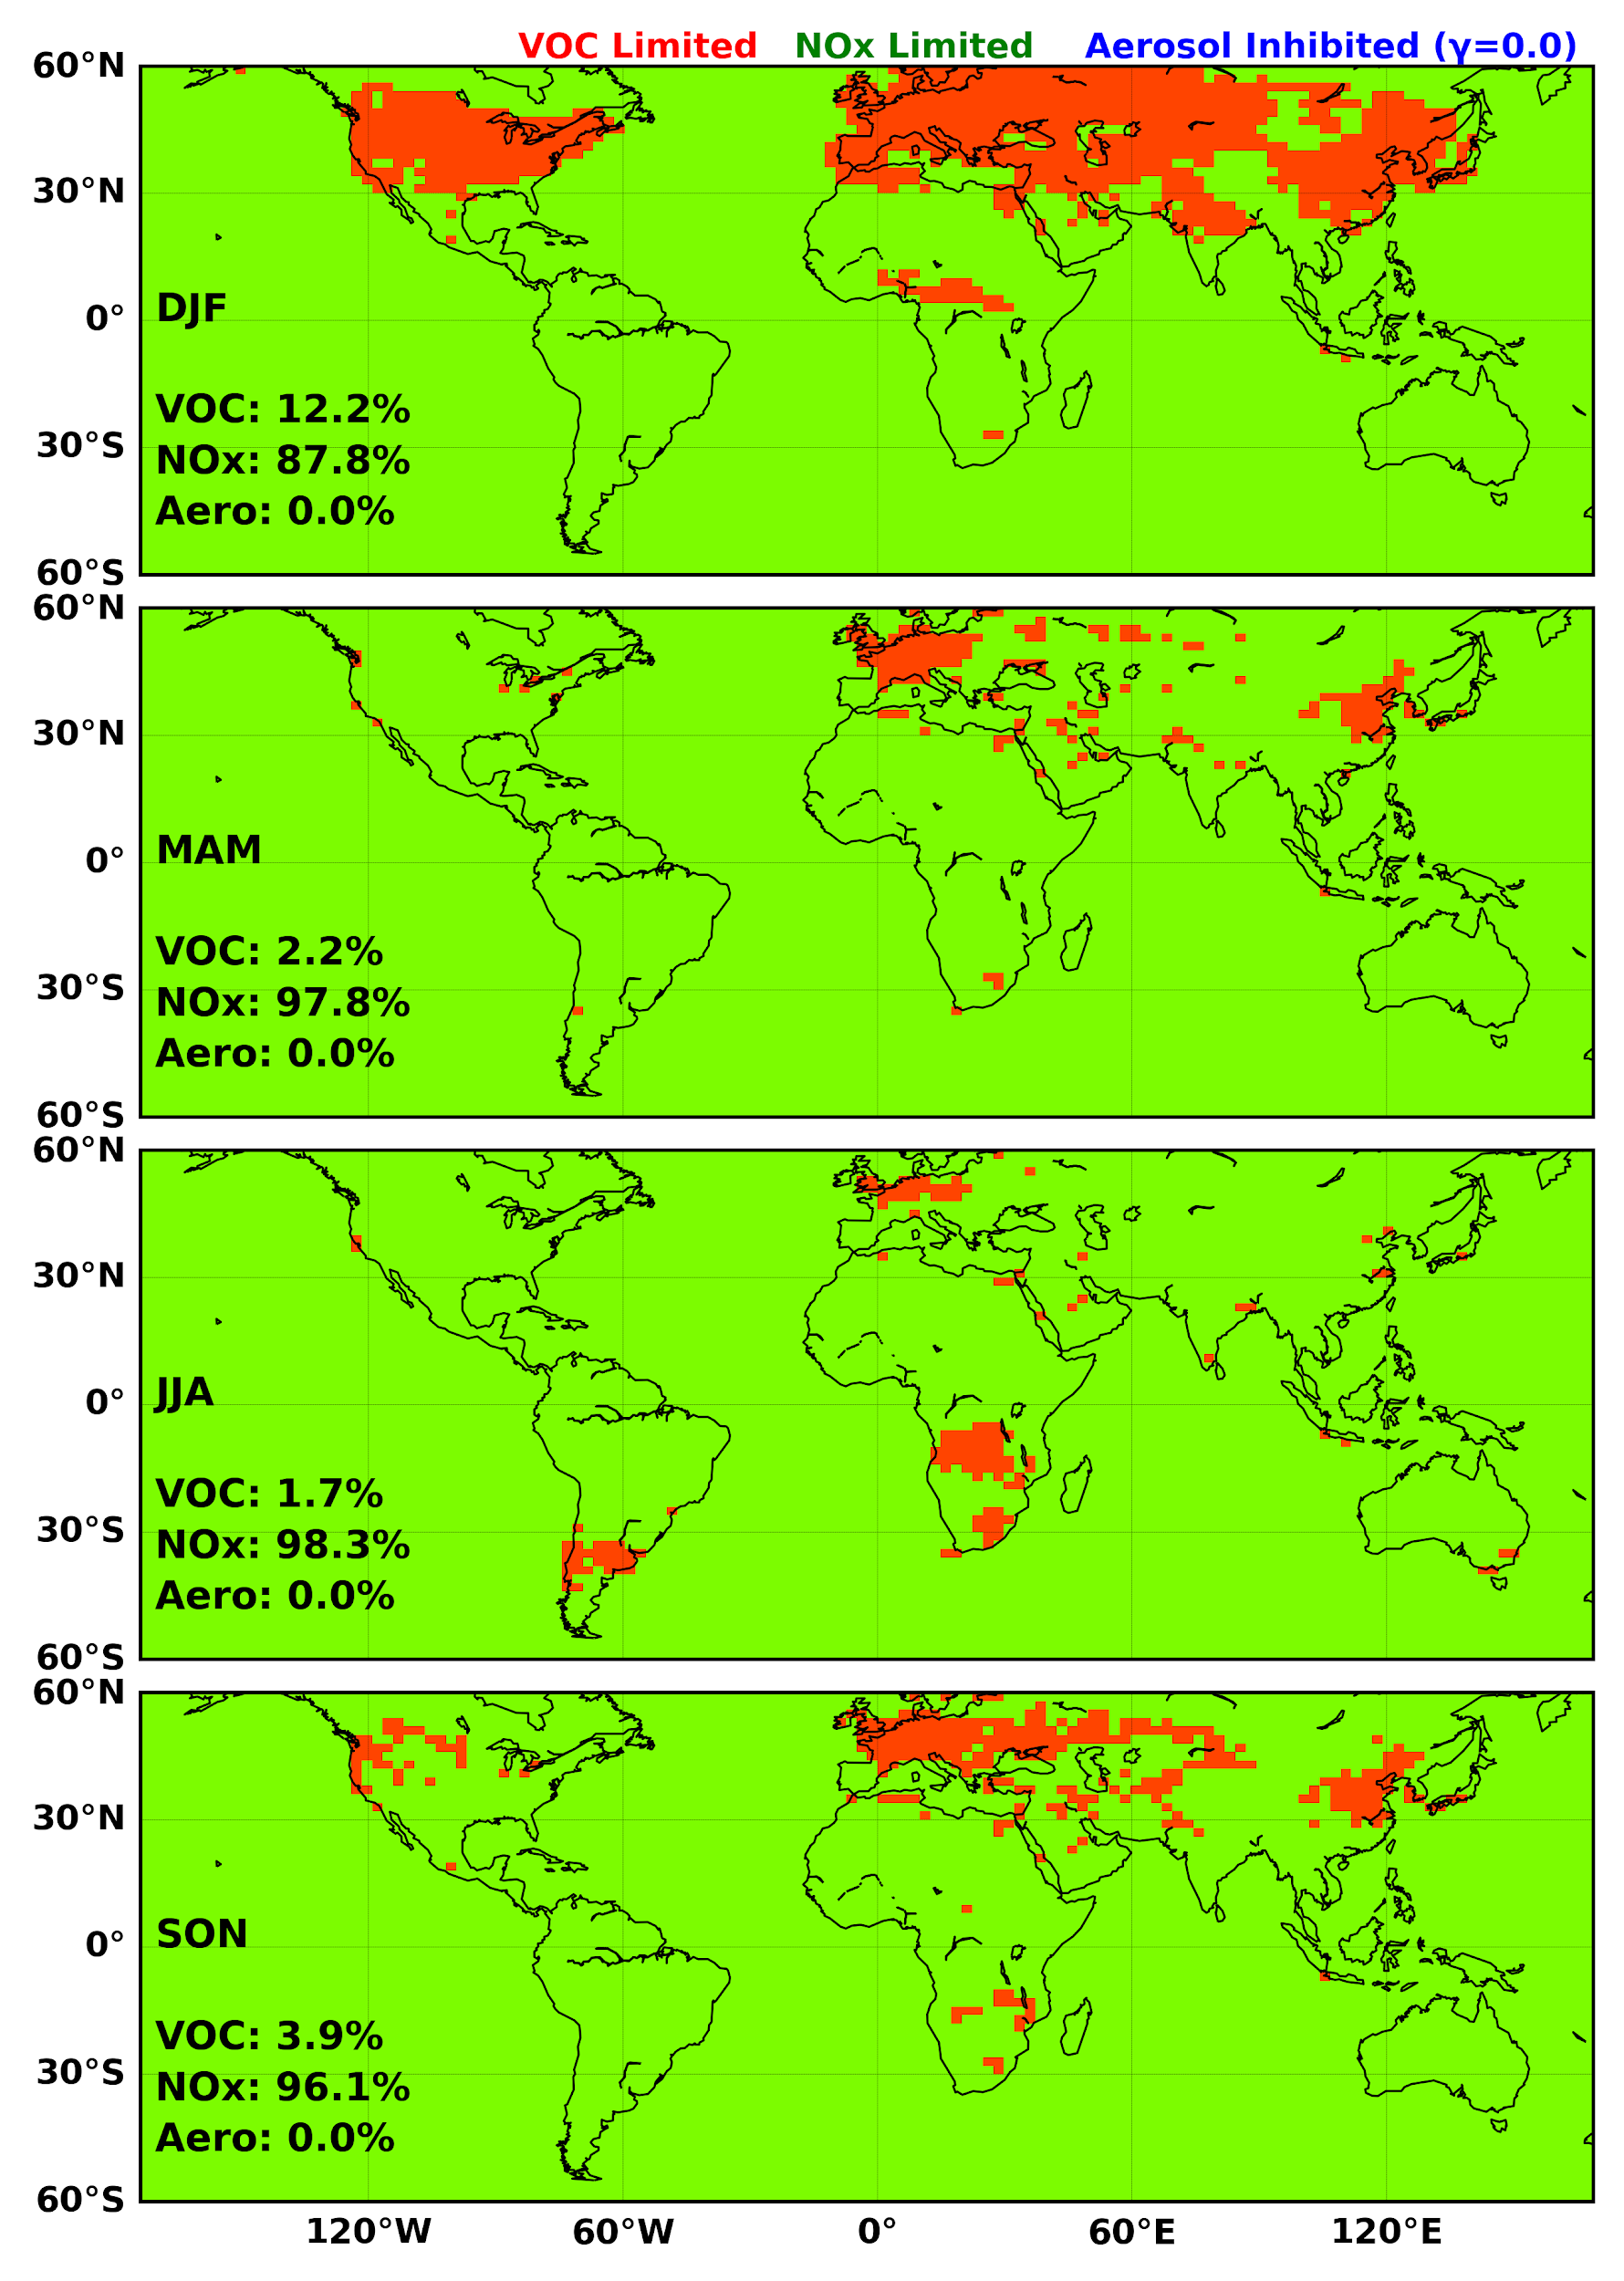
**

**Supplementary Fig. 1|** The regional distribution of various ozone generation photochemical regimes modelled with an aerosol uptake coefficient of 0 in 2018.

**
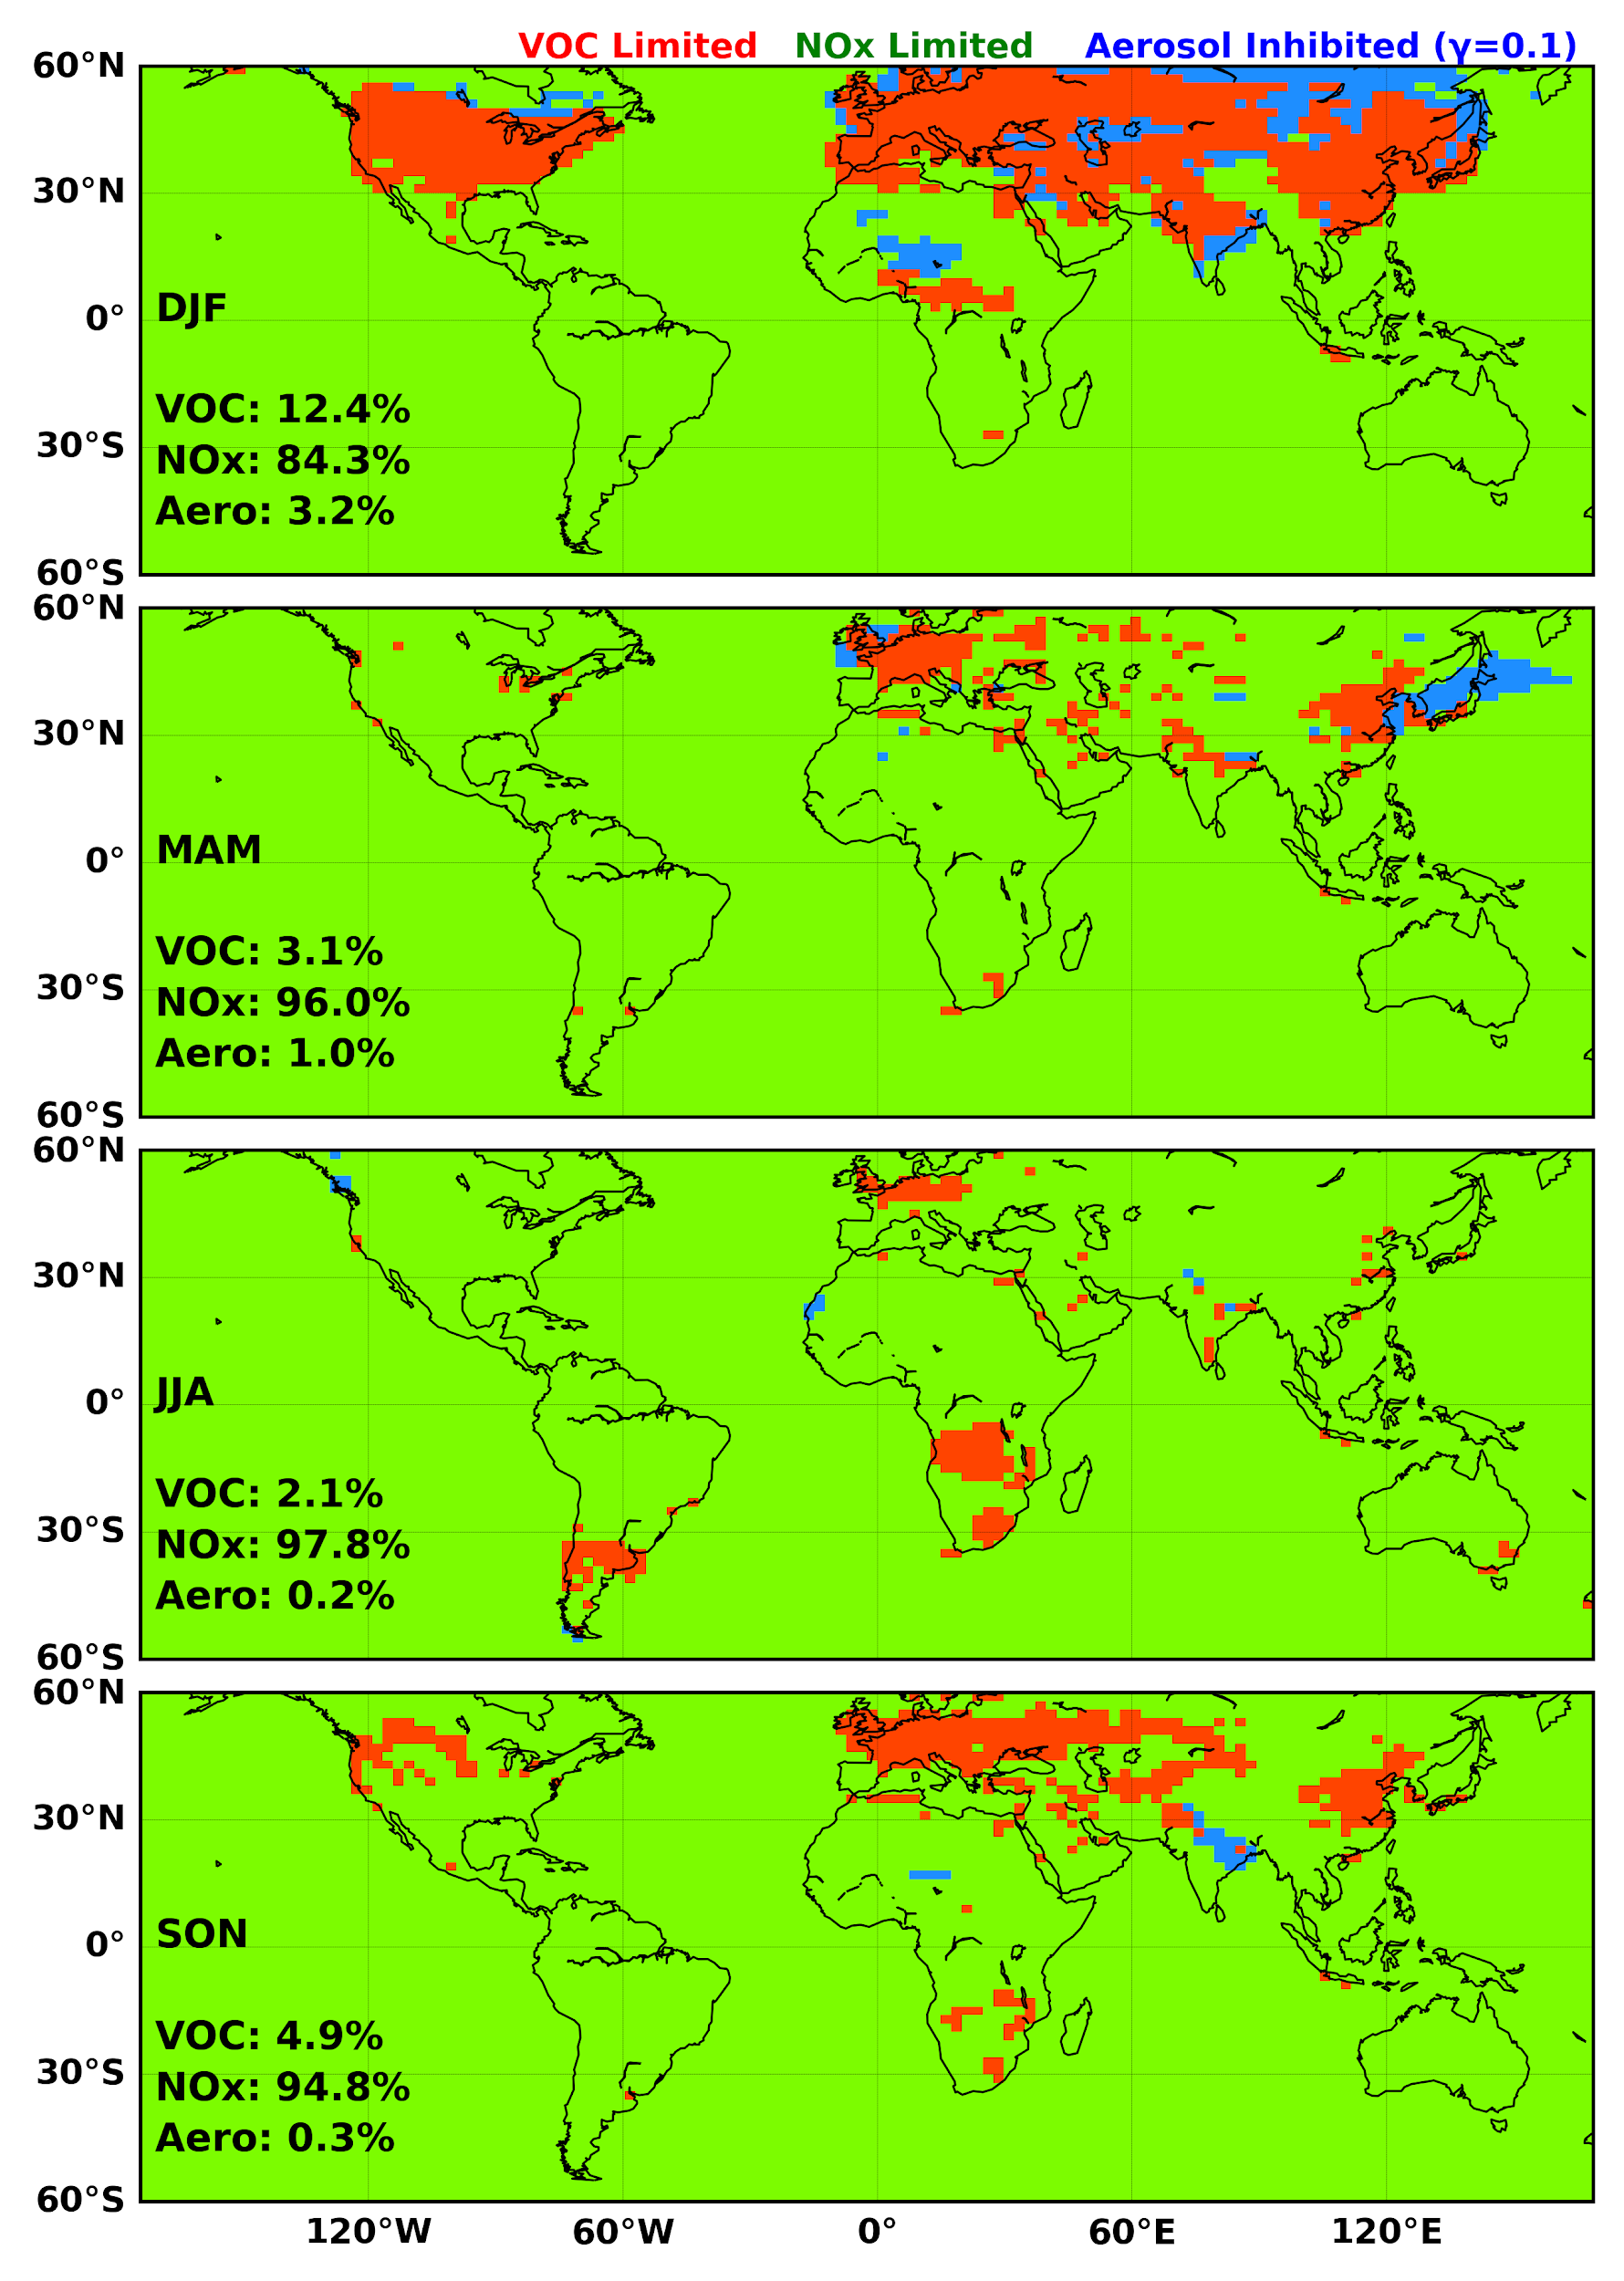
**

**Supplementary Fig. 2|** The regional distribution of various ozone generation photochemical regimes modelled with an aerosol uptake coefficient of 0.1 in 2018.

**
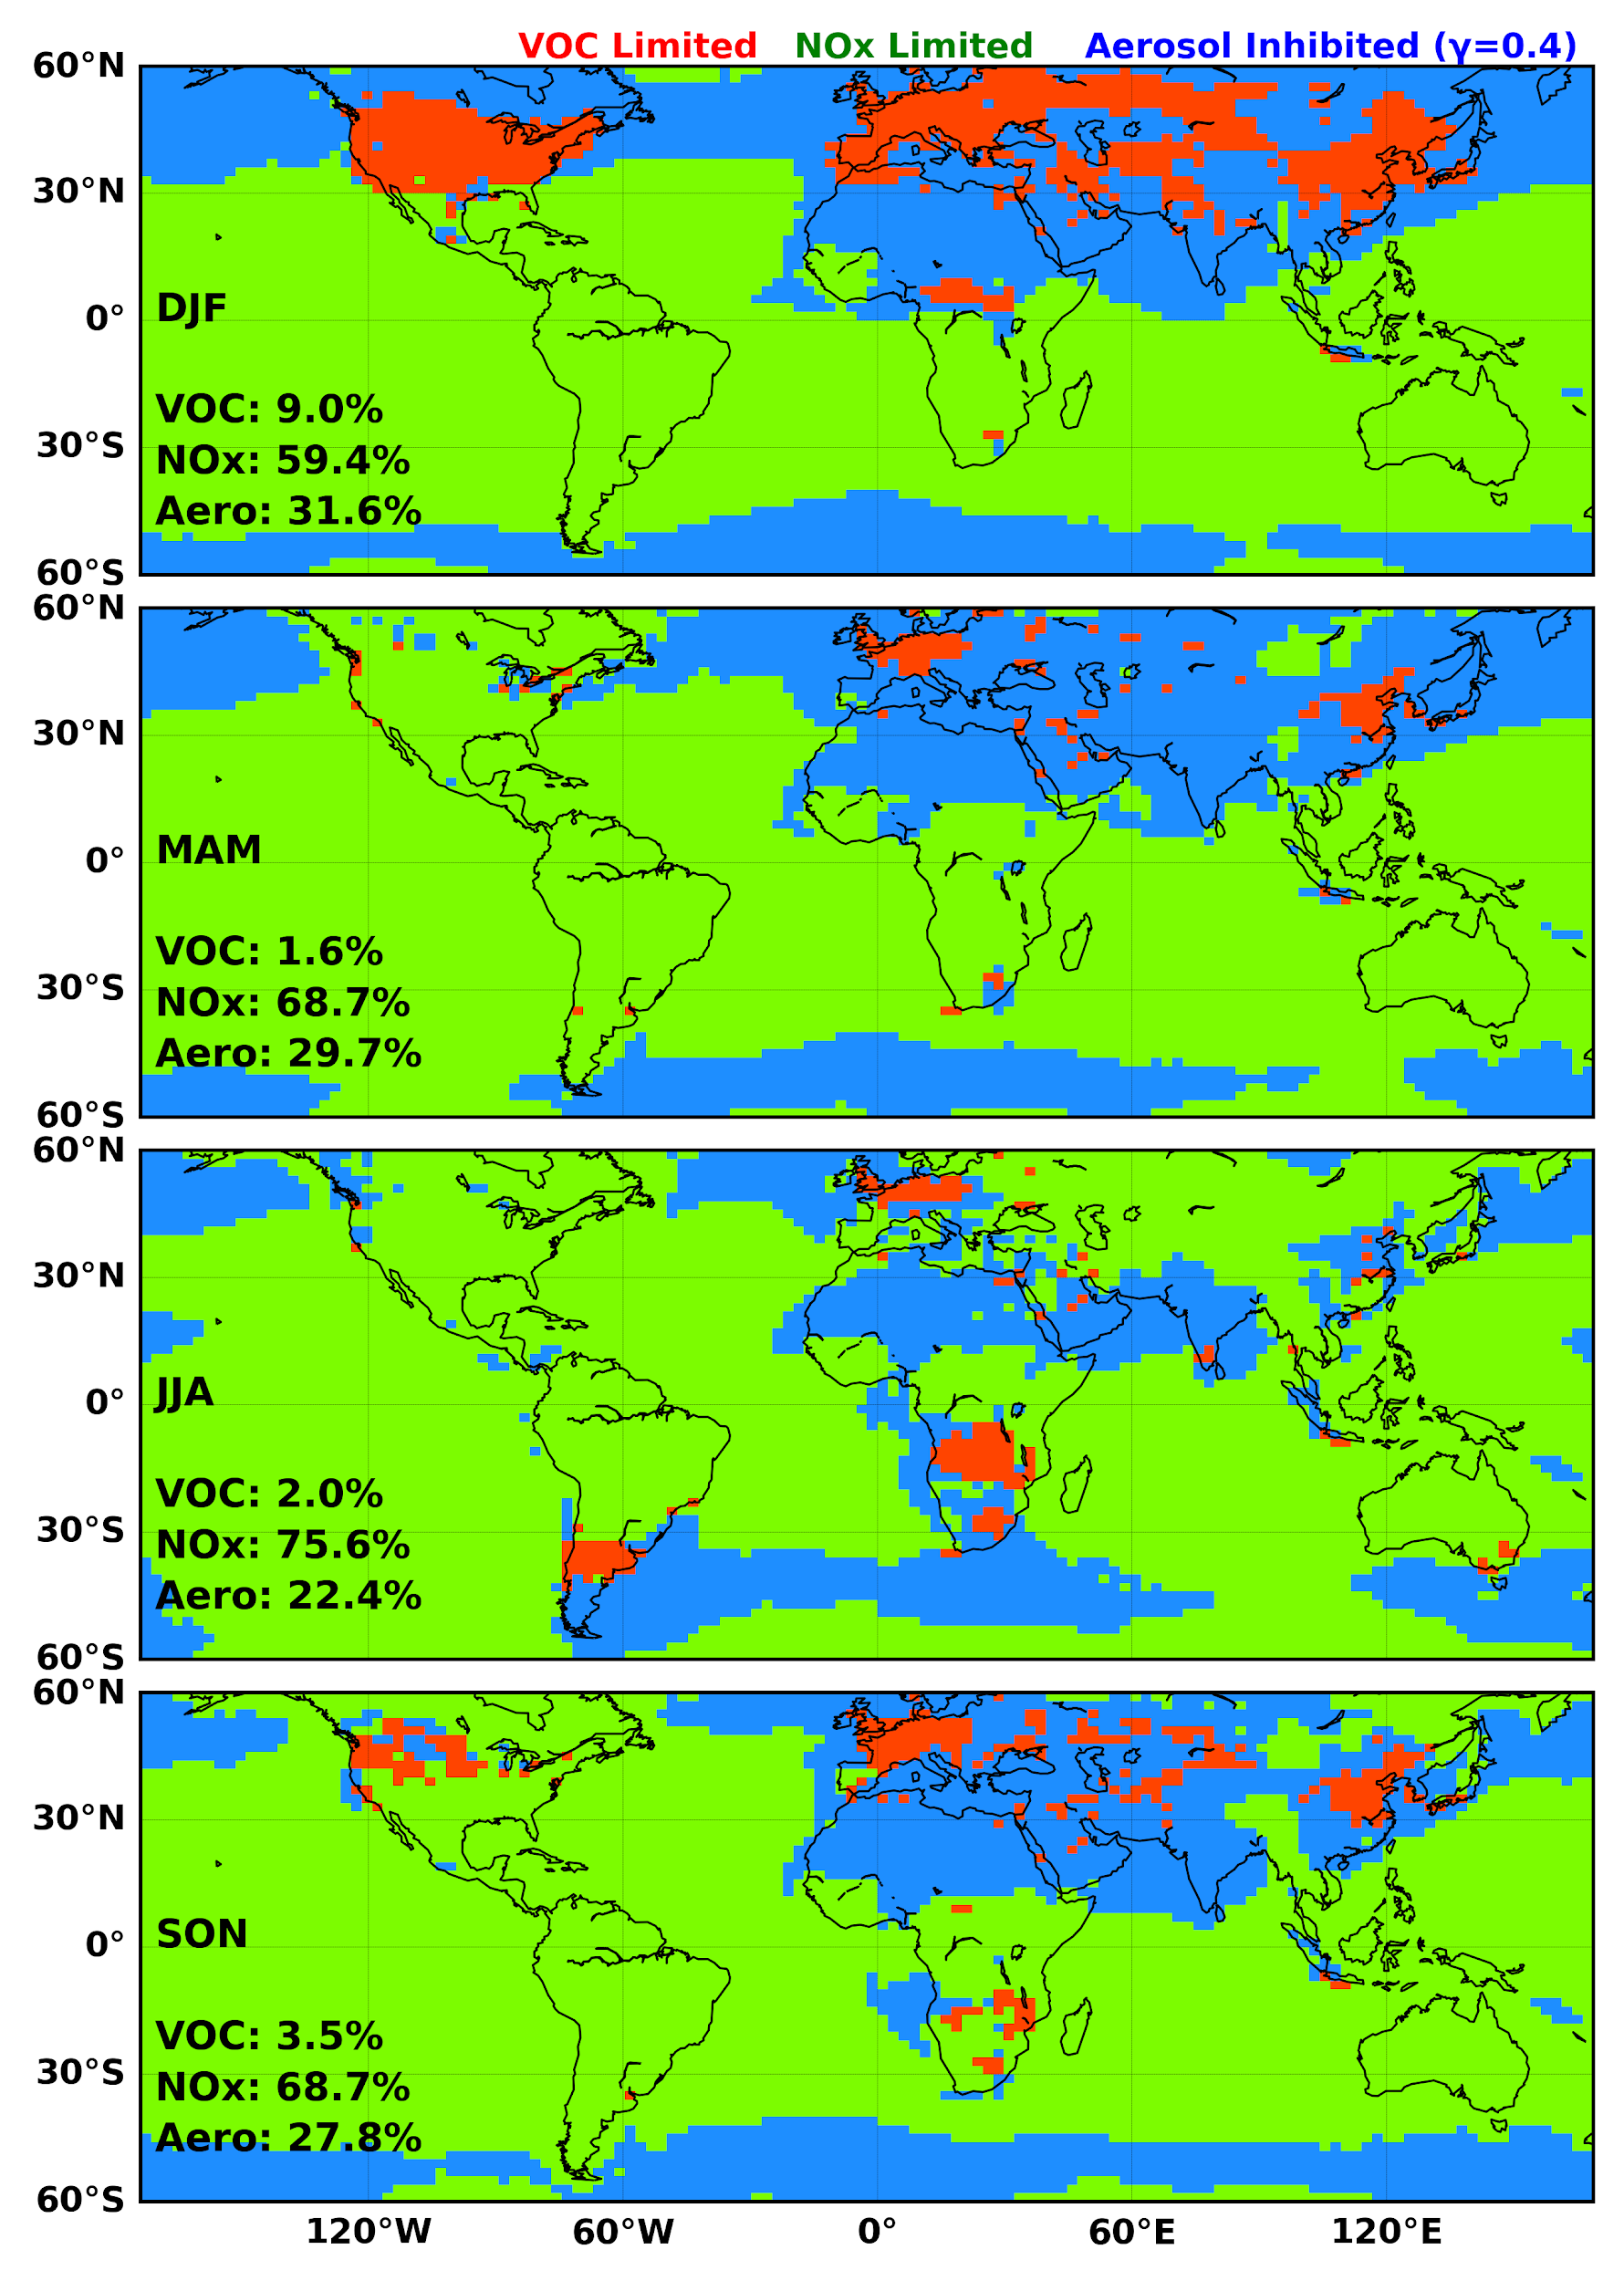
**

**Supplementary Fig. 3|** The regional distribution of various ozone generation photochemical regimes modelled with an aerosol uptake coefficient of 0.4 in 2018.

**
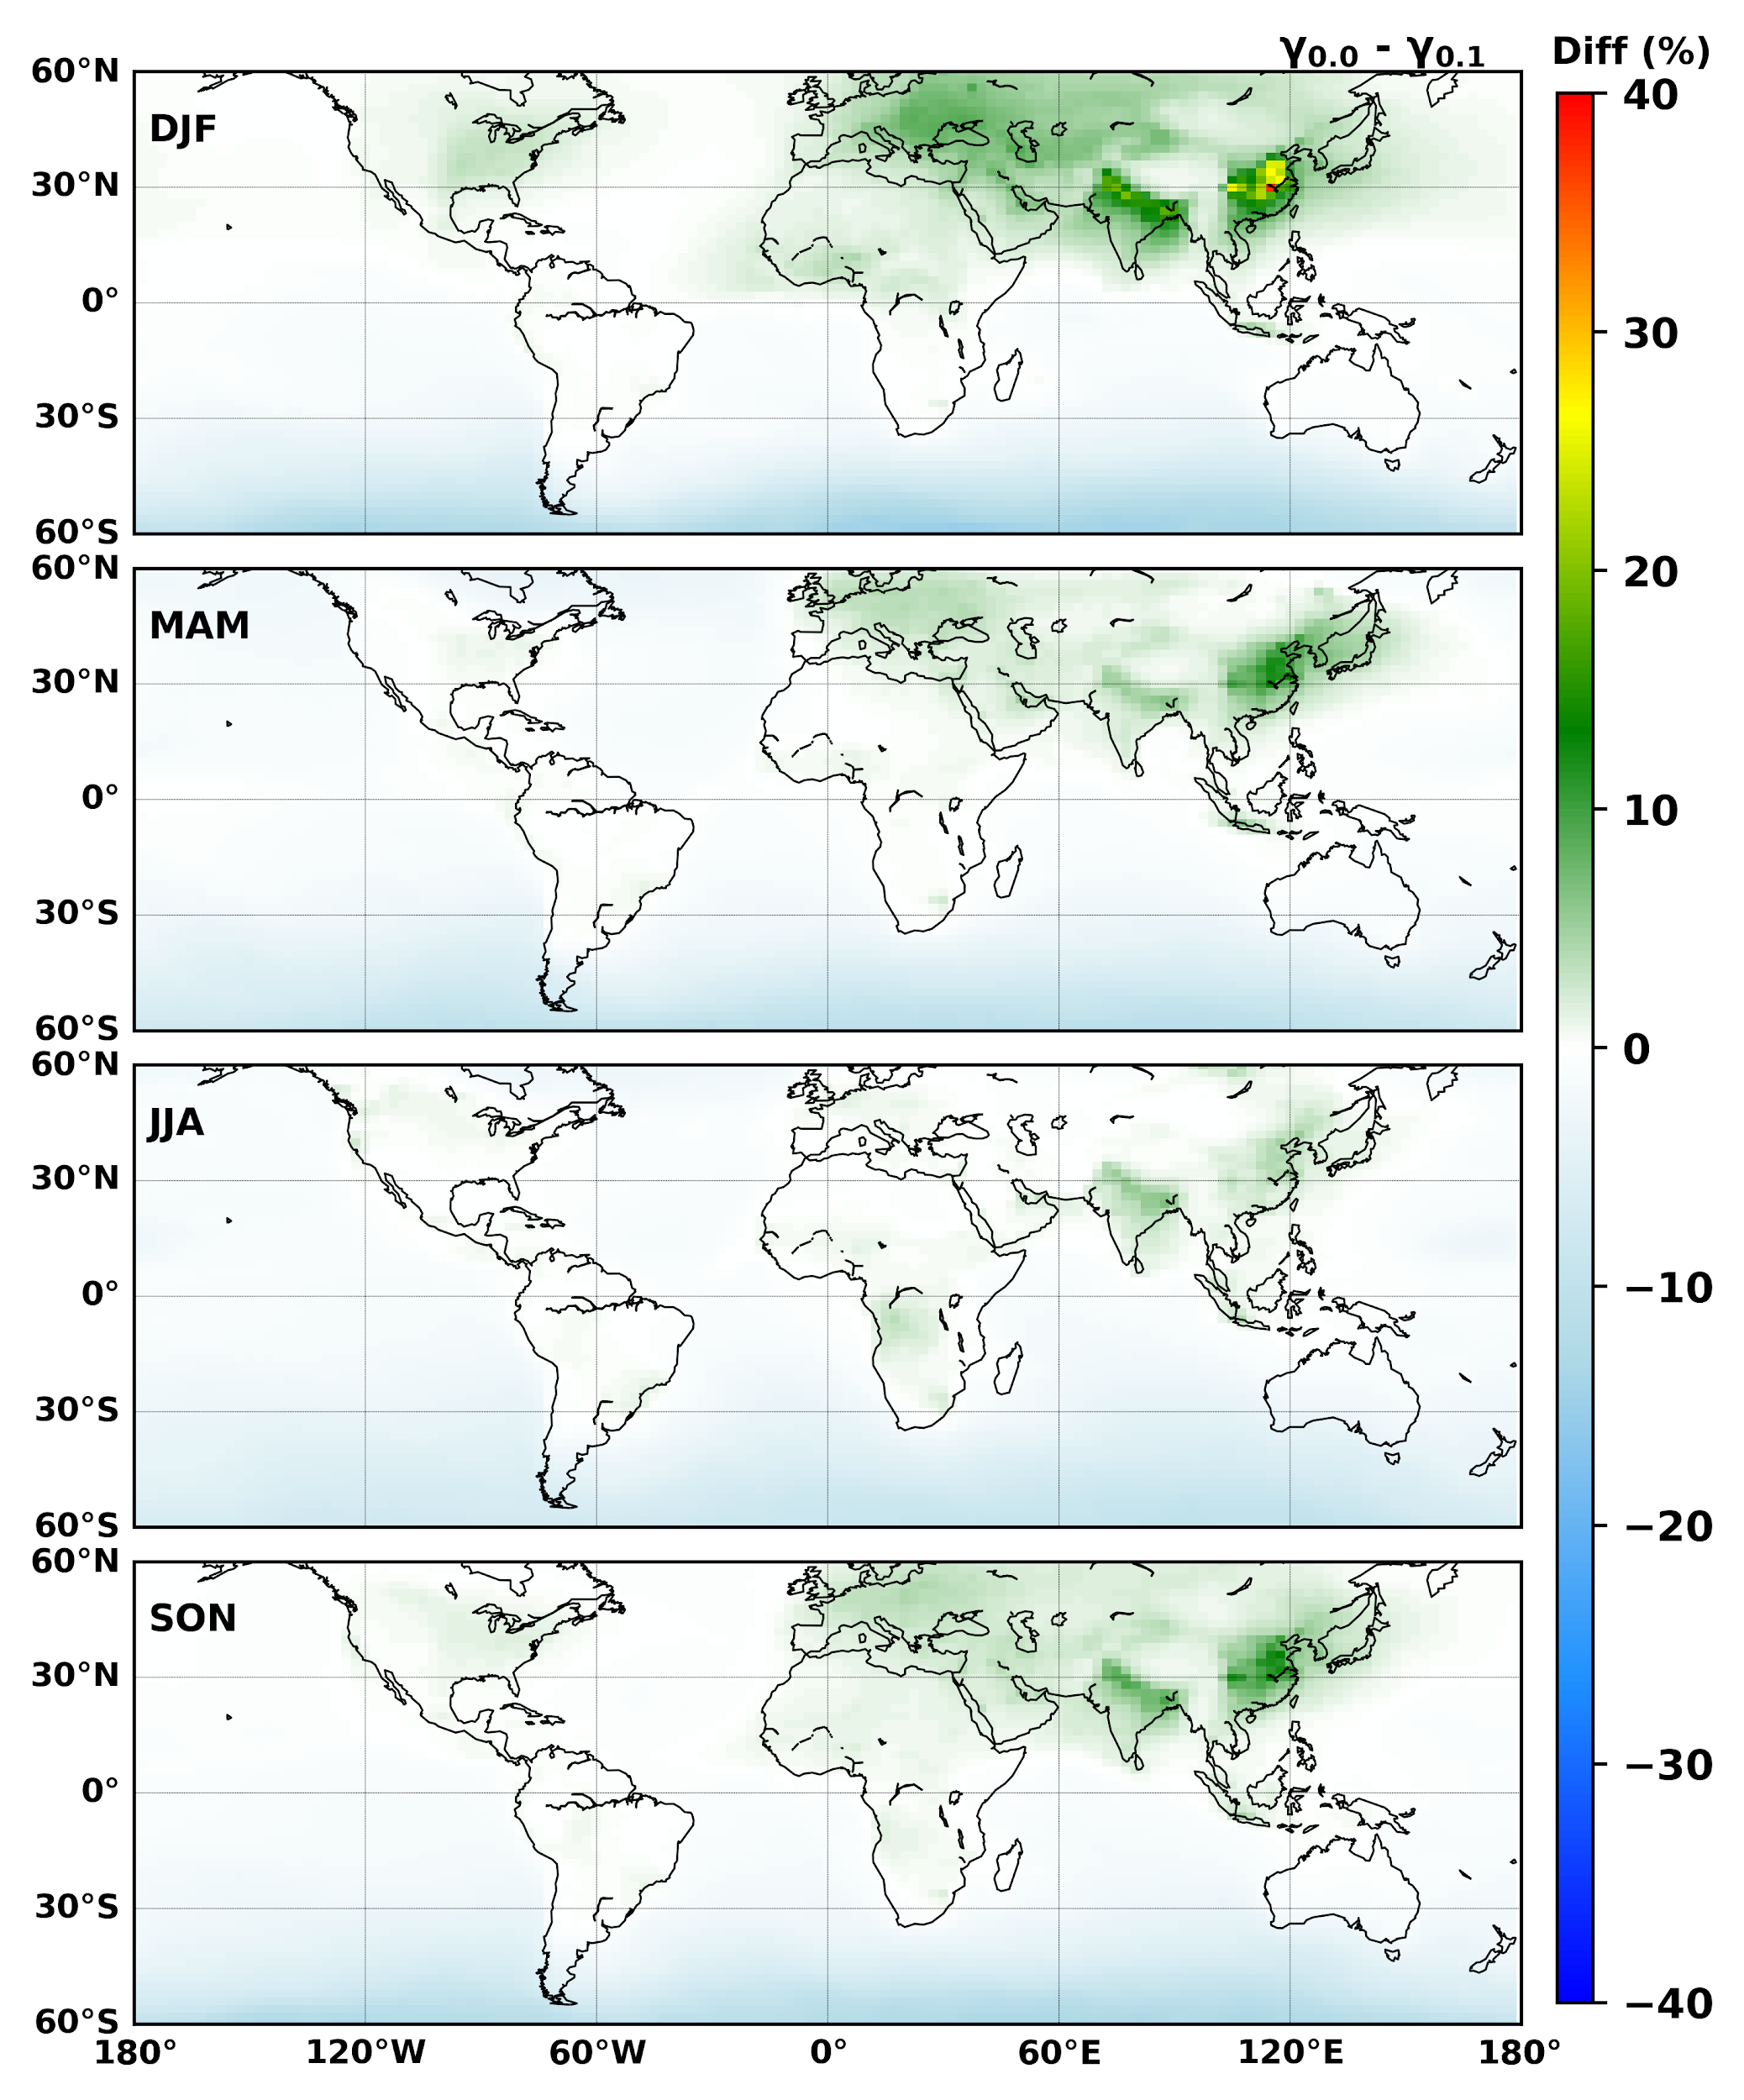
**

**Supplementary Fig. 4|** The percentage change in surface ozone between 0 aerosol uptake and 0.1 aerosol uptake values in 2018.

**
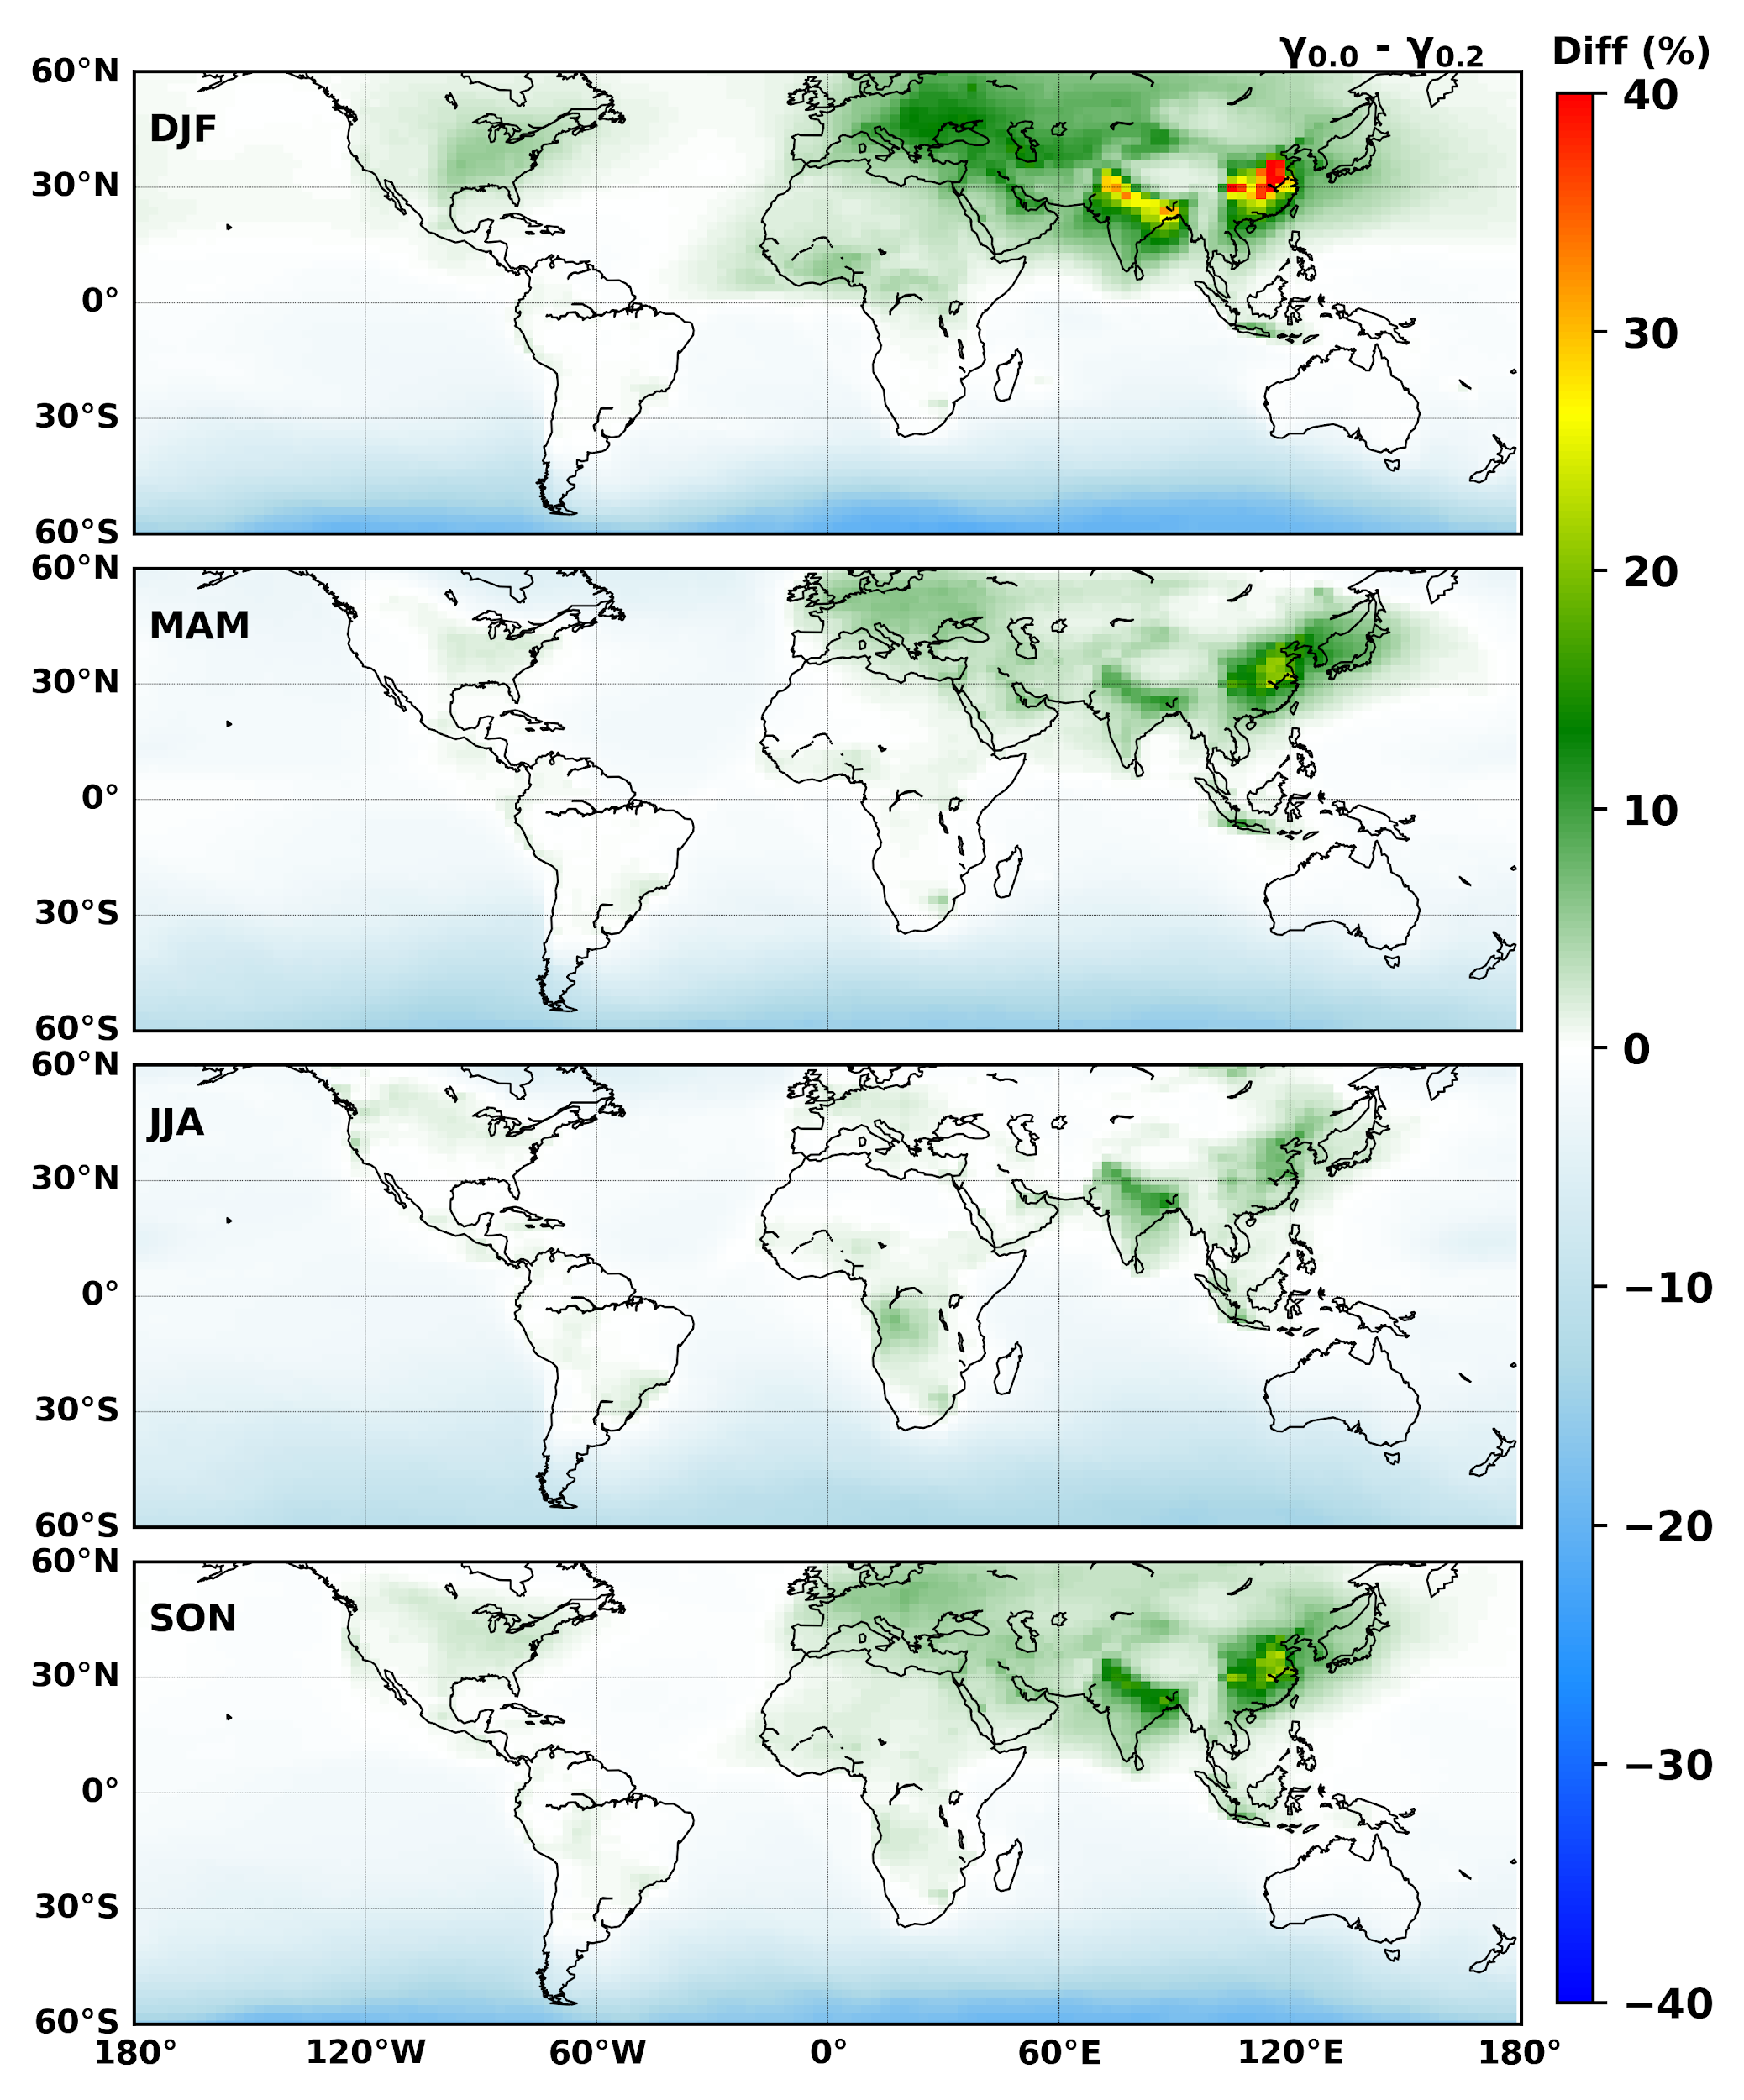
**

**Supplementary Fig. 5|** The percentage change in surface ozone between when γHO2 is0 and 0.2 in 2018.


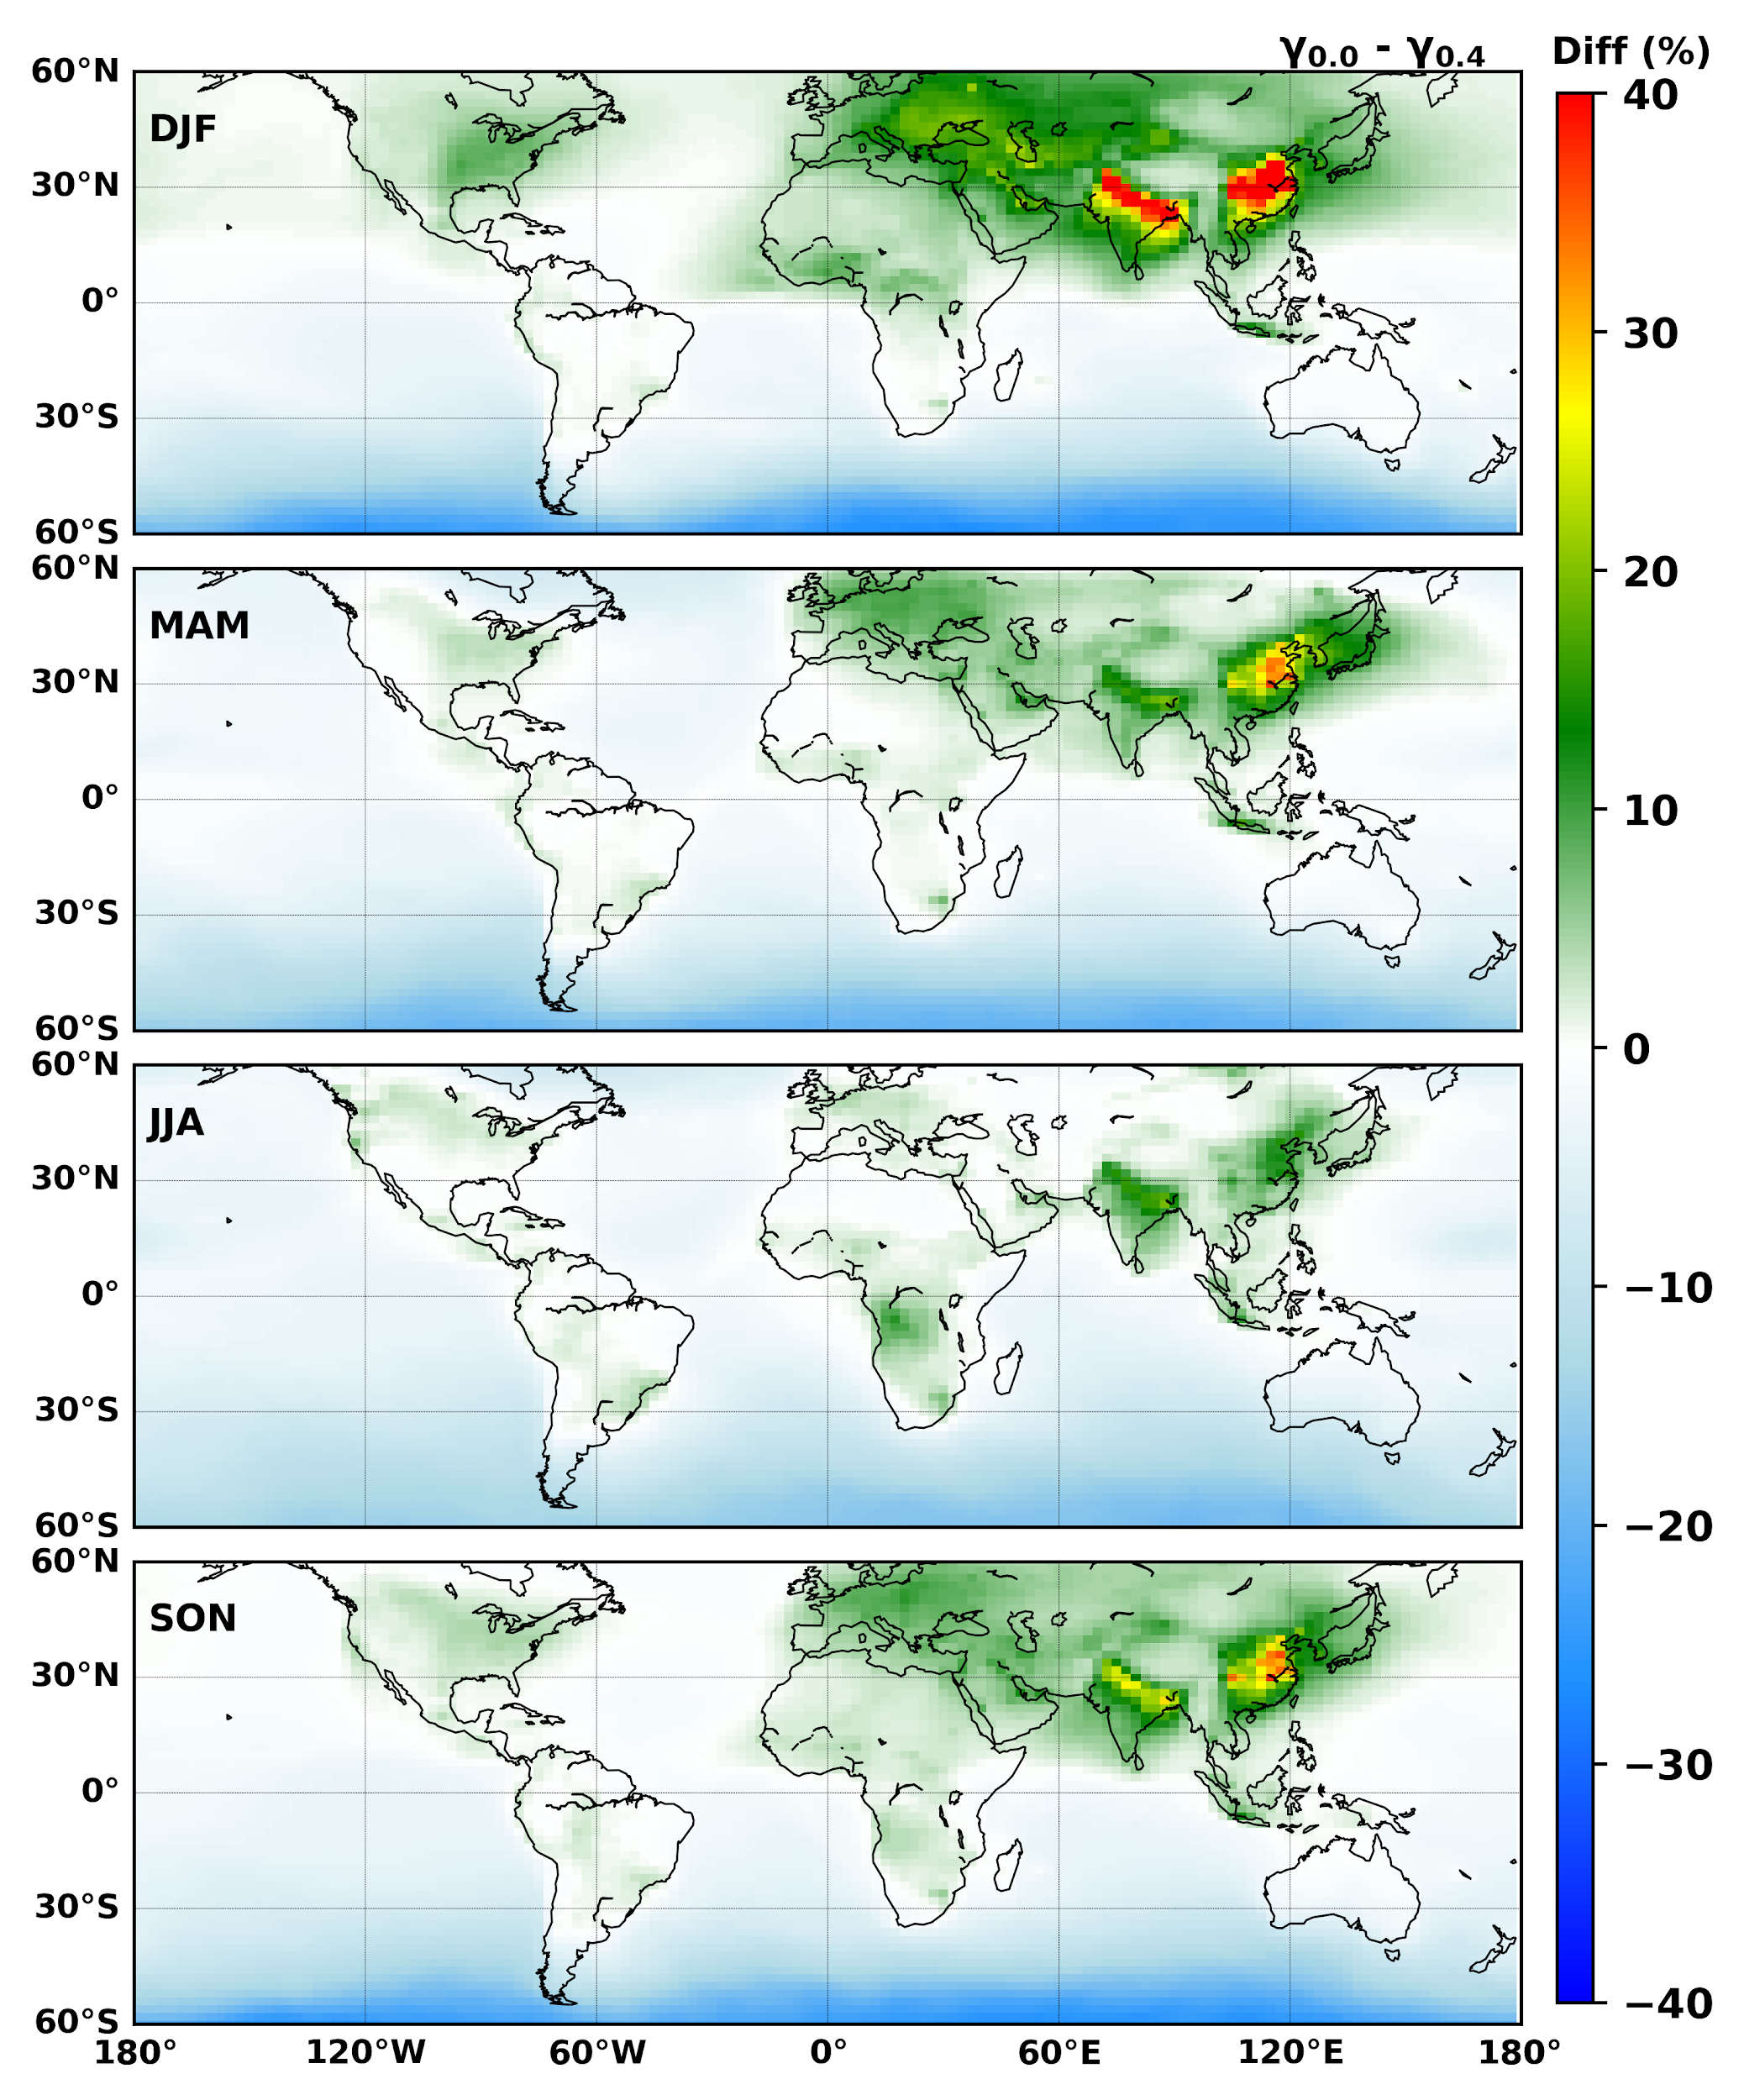


**Supplementary Fig. 6|** The percentage change in surface ozone between 0 aerosol uptake and 0.4 aerosol uptake values in 2018.


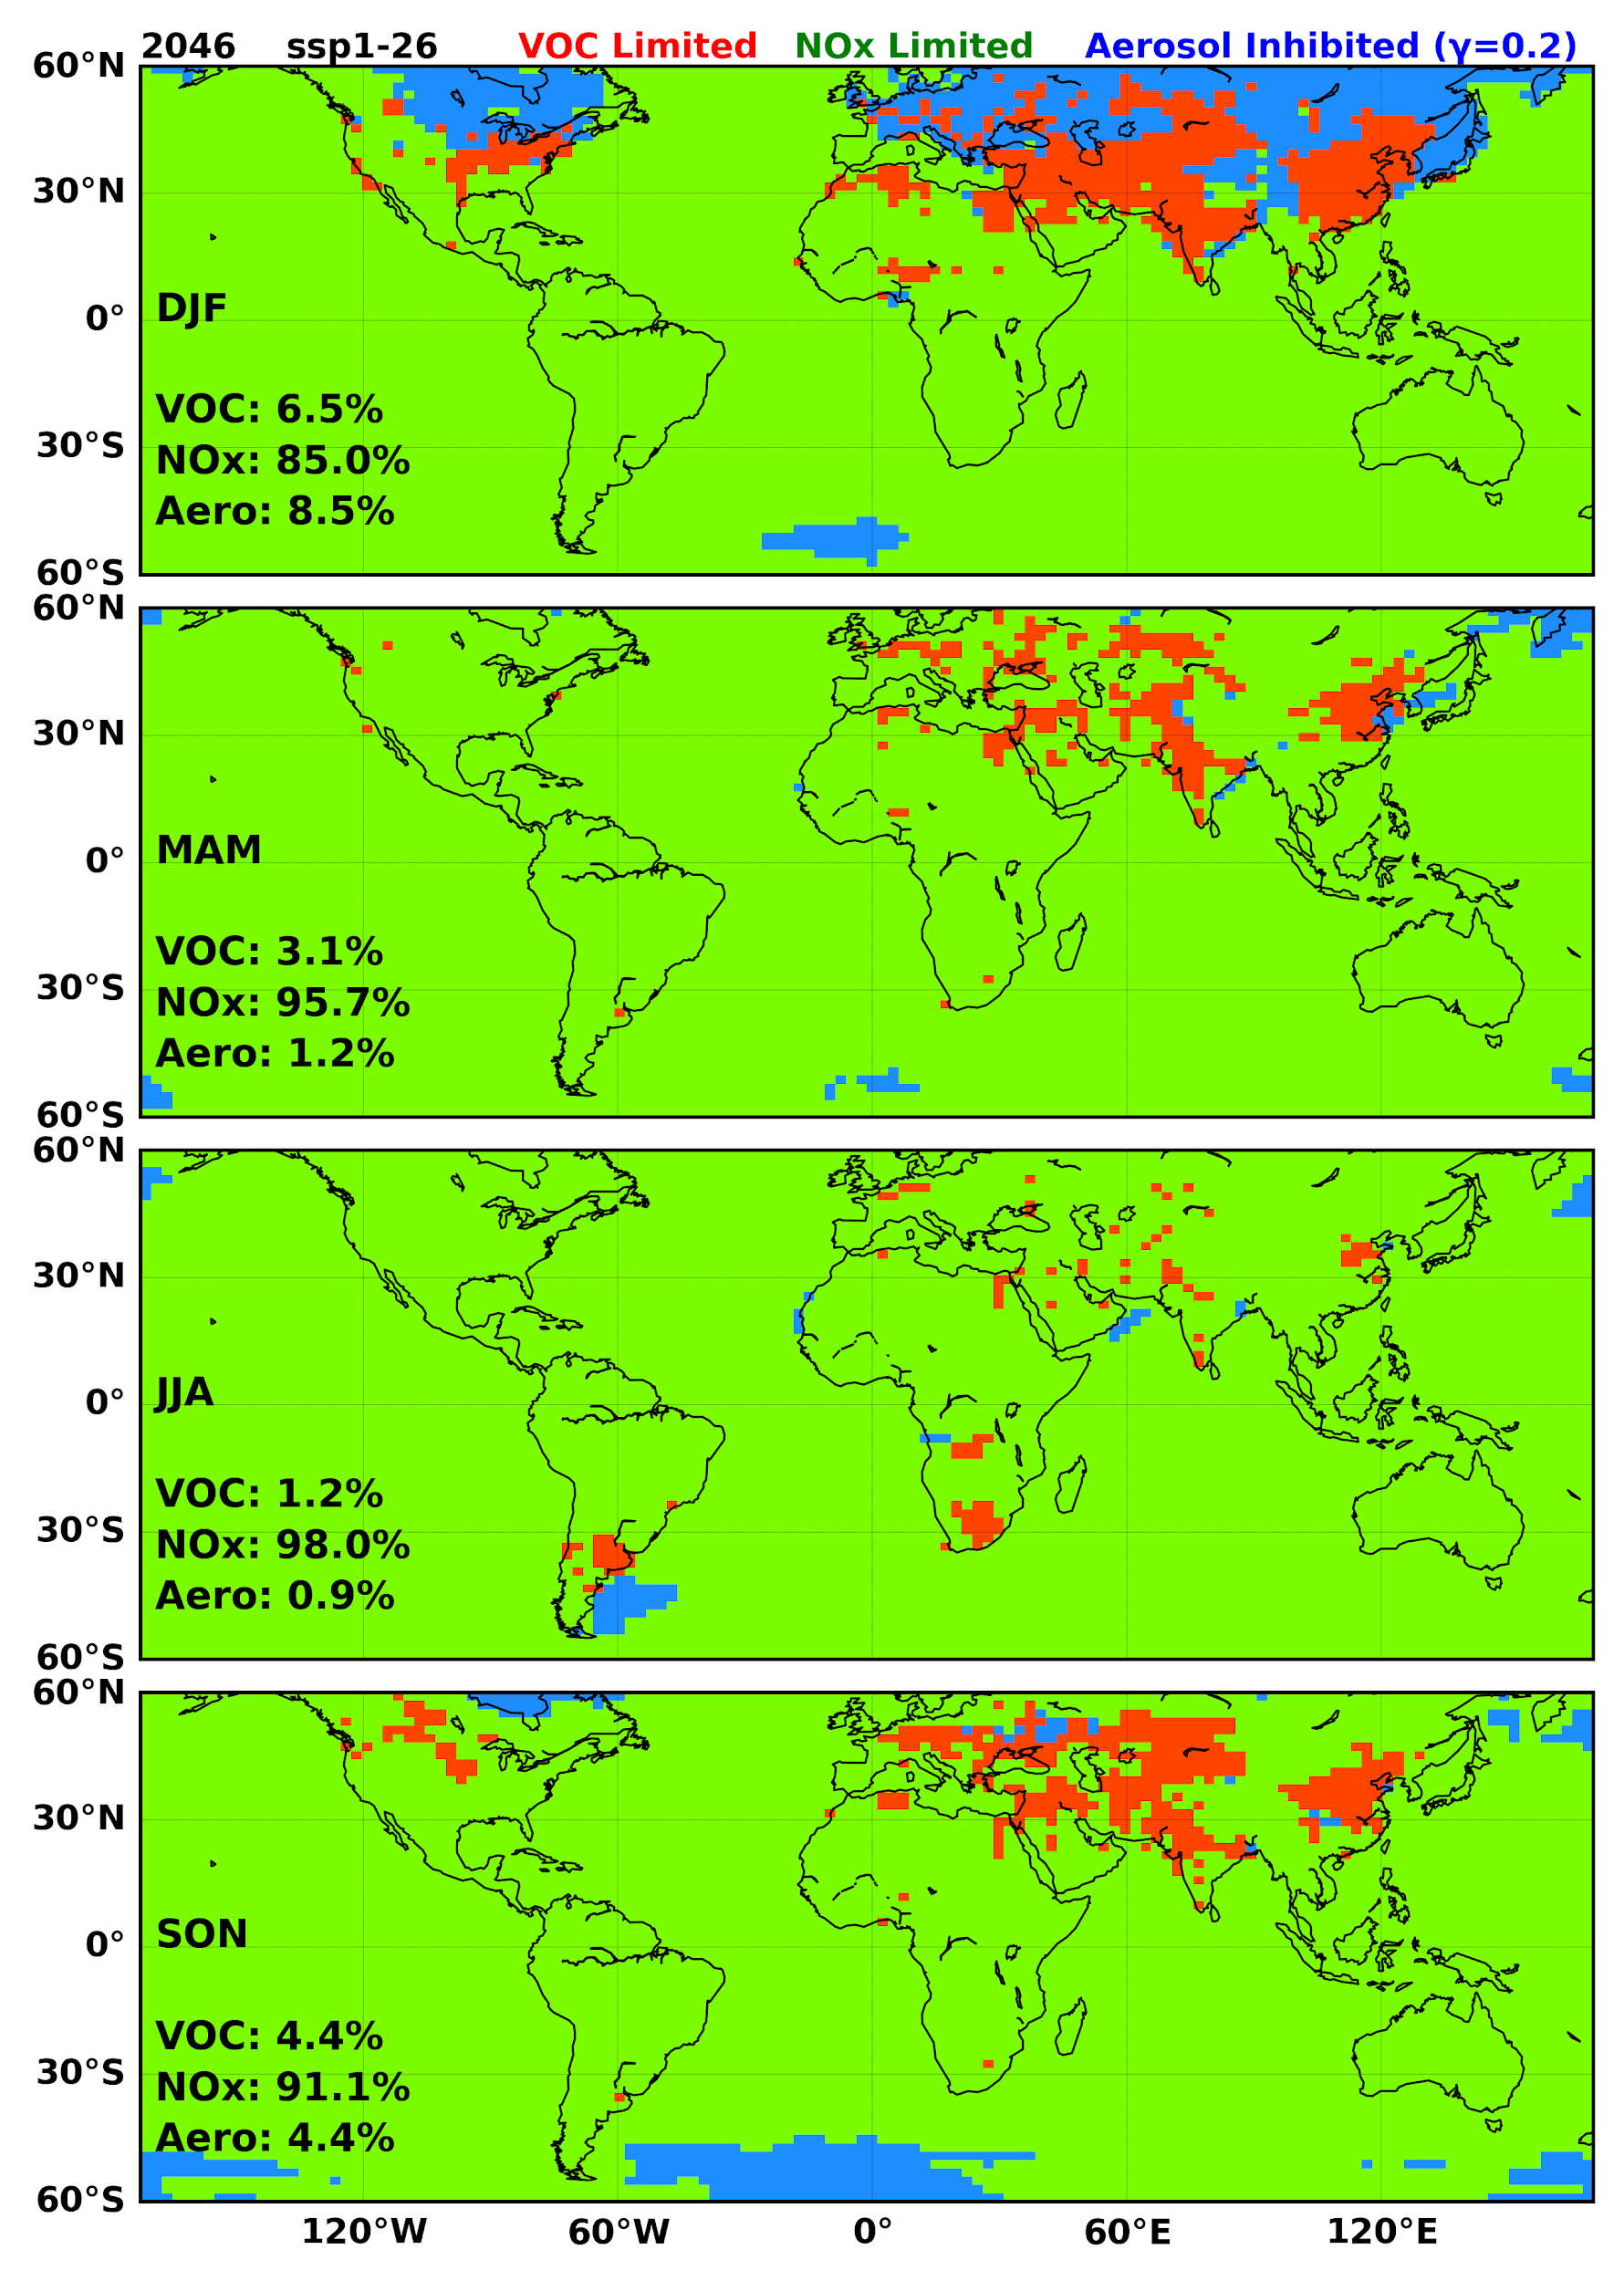


**Supplementary Fig. 7|** The regional distribution of ozone generation photochemical regimes modelled with an aerosol uptake coefficient of 0.2 in the SSP 1-2.6 scenario for 2046


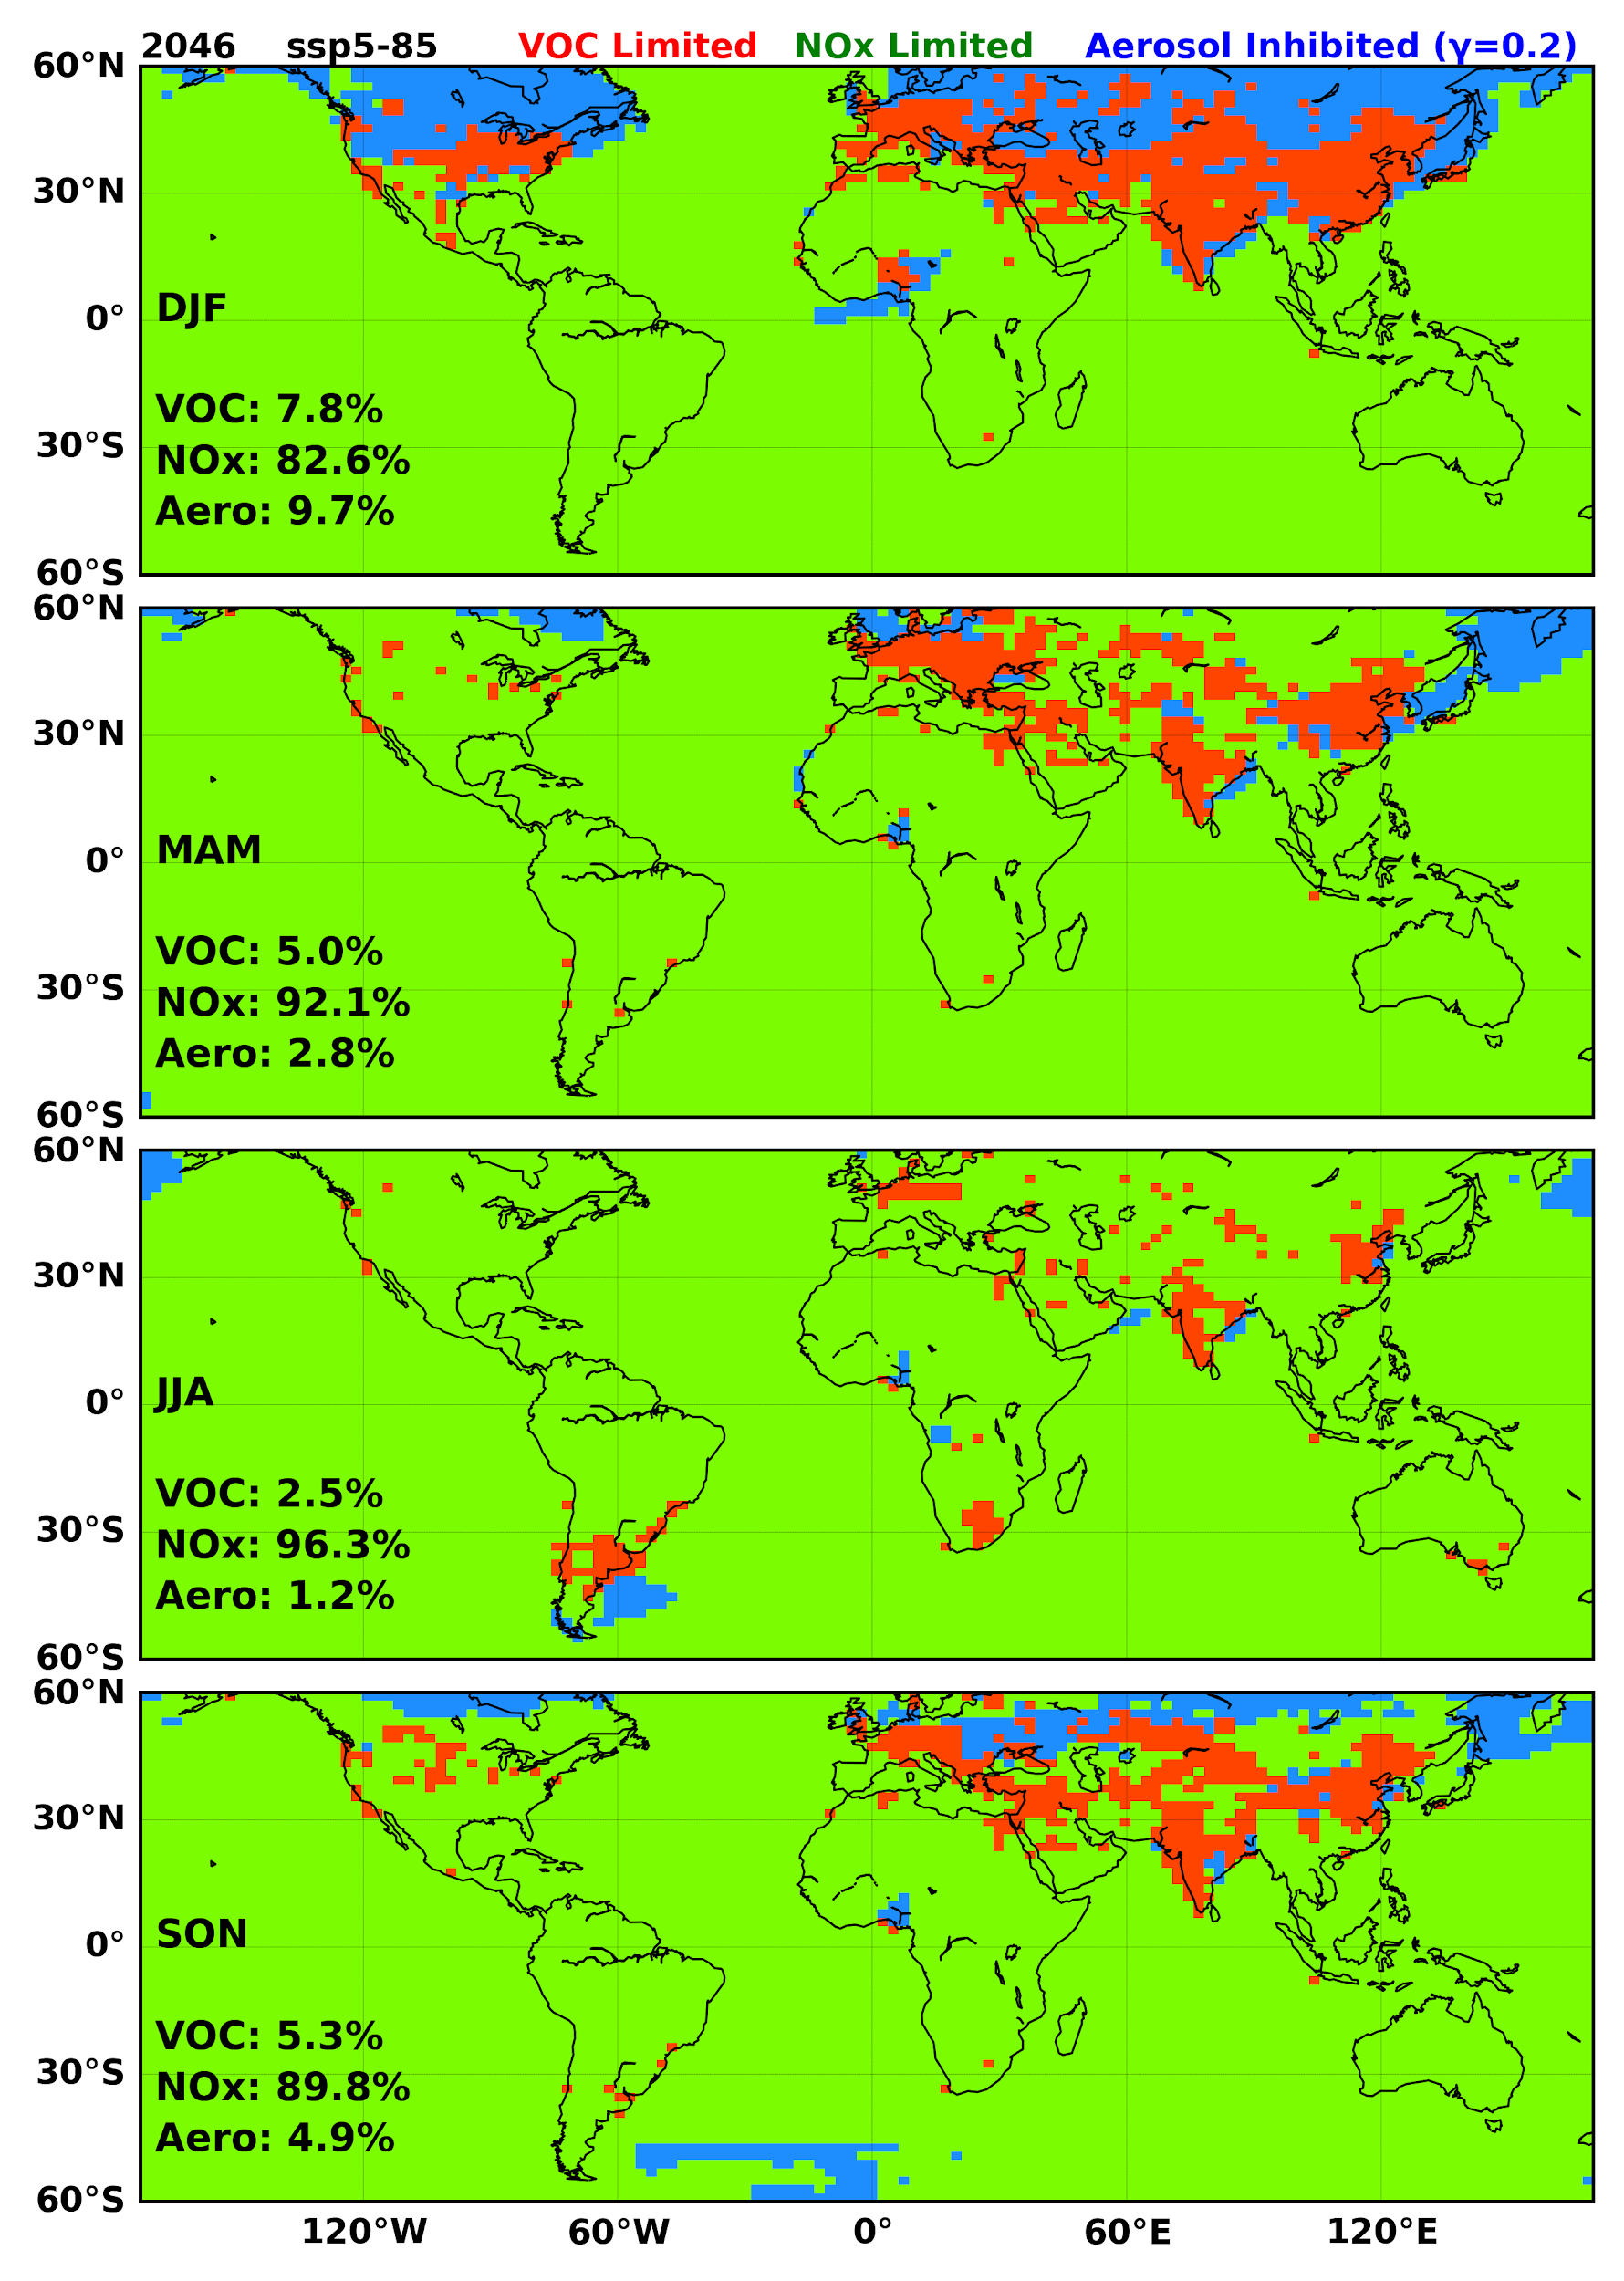


**Supplementary Fig. 8|** The regional distribution of ozone generation photochemical regimes modelled with an aerosol uptake coefficient of 0.2 in the SSP 5-8.5 scenario for 2046

**
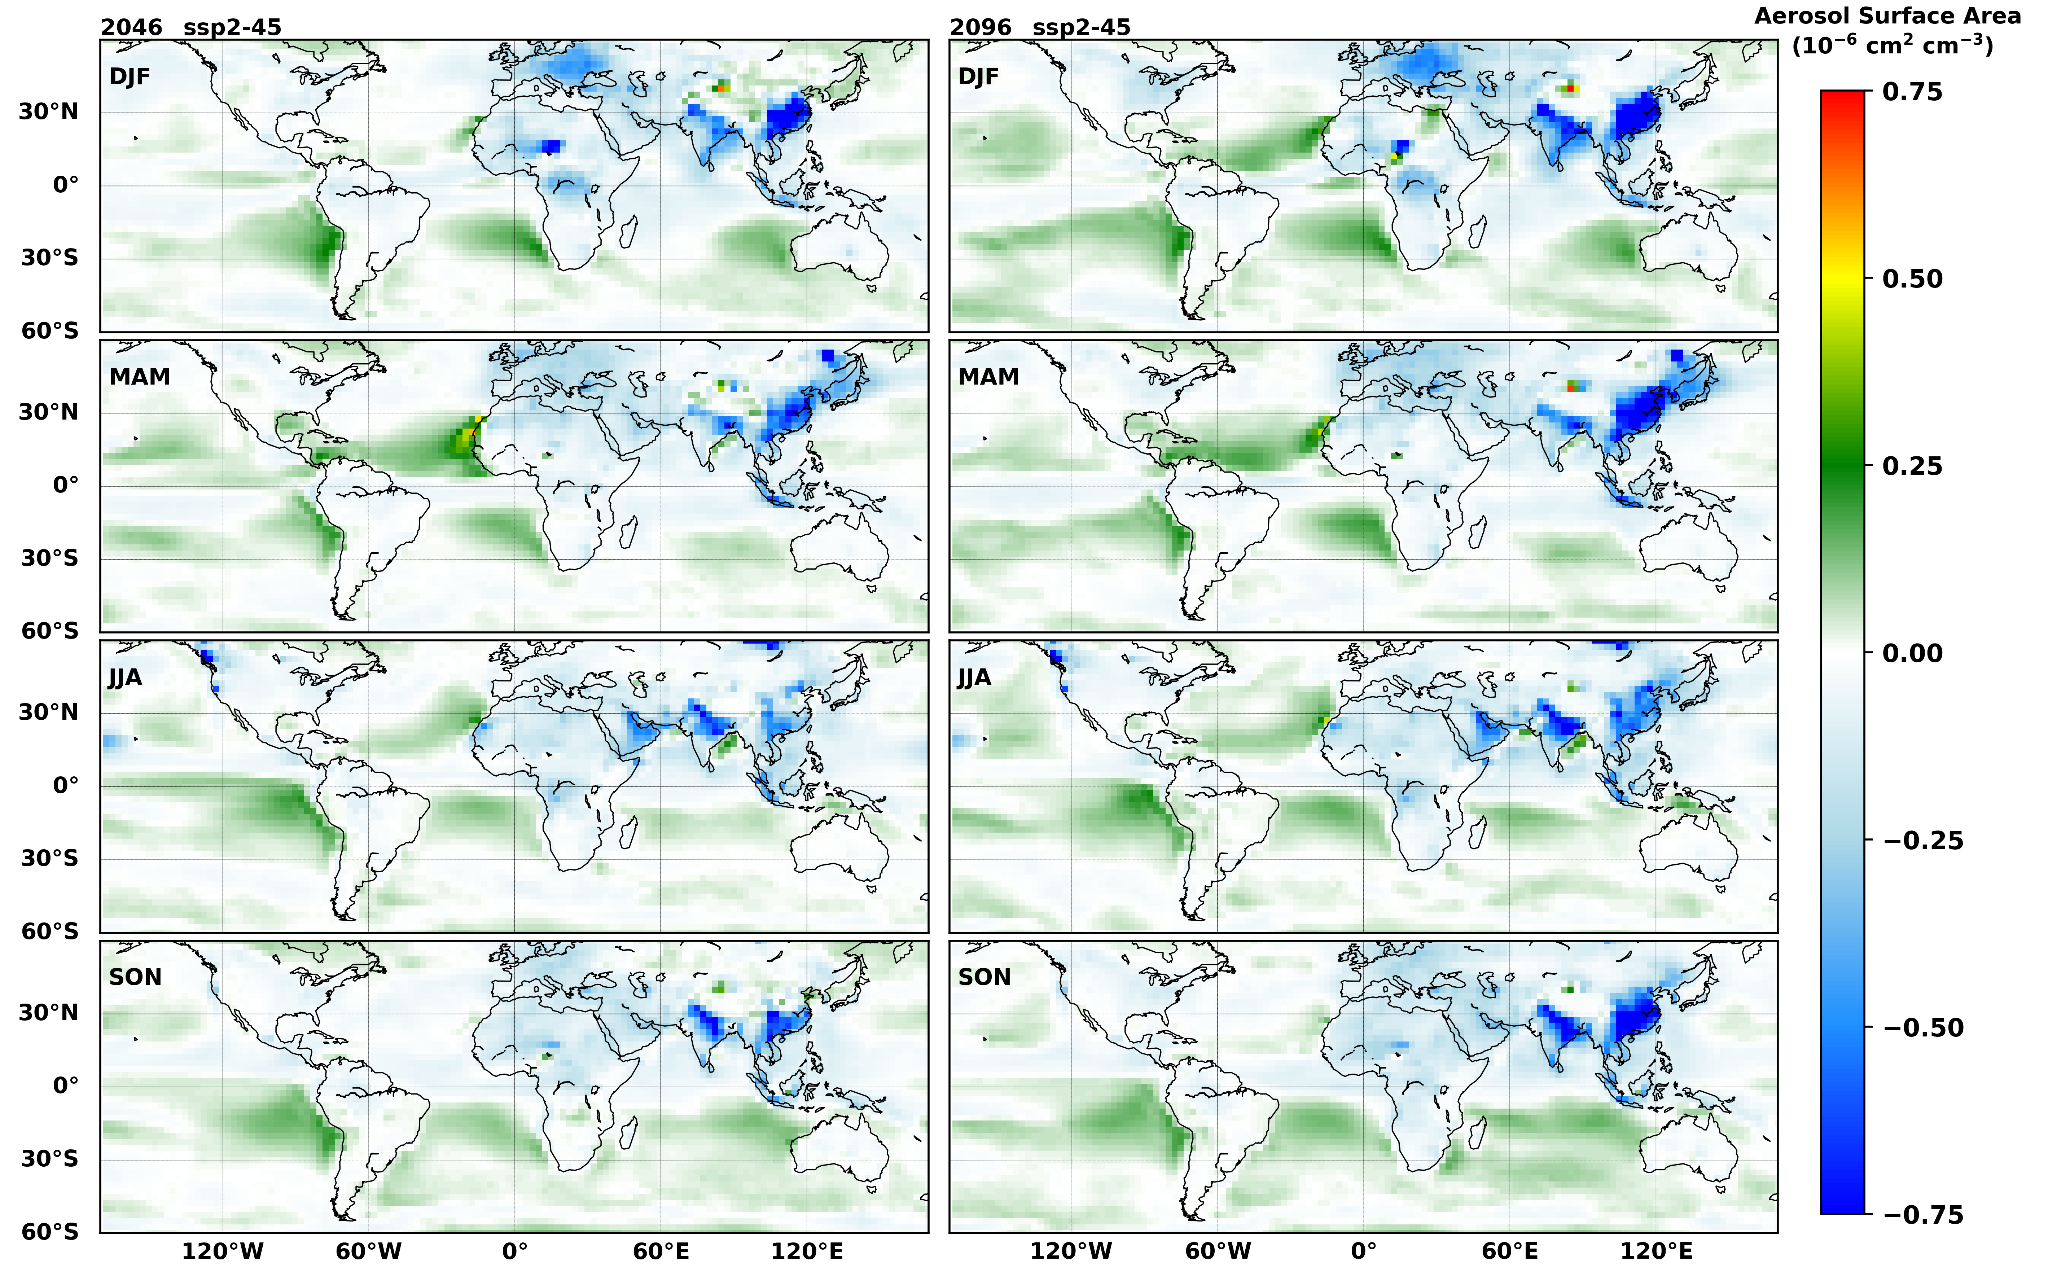
**

**Supplementary Fig. 9|** The change in Aerosol surface area density in SSP 2-4.5 for **[left]** 2046 and **[right]** 2096 when compared to that of 2018.

**
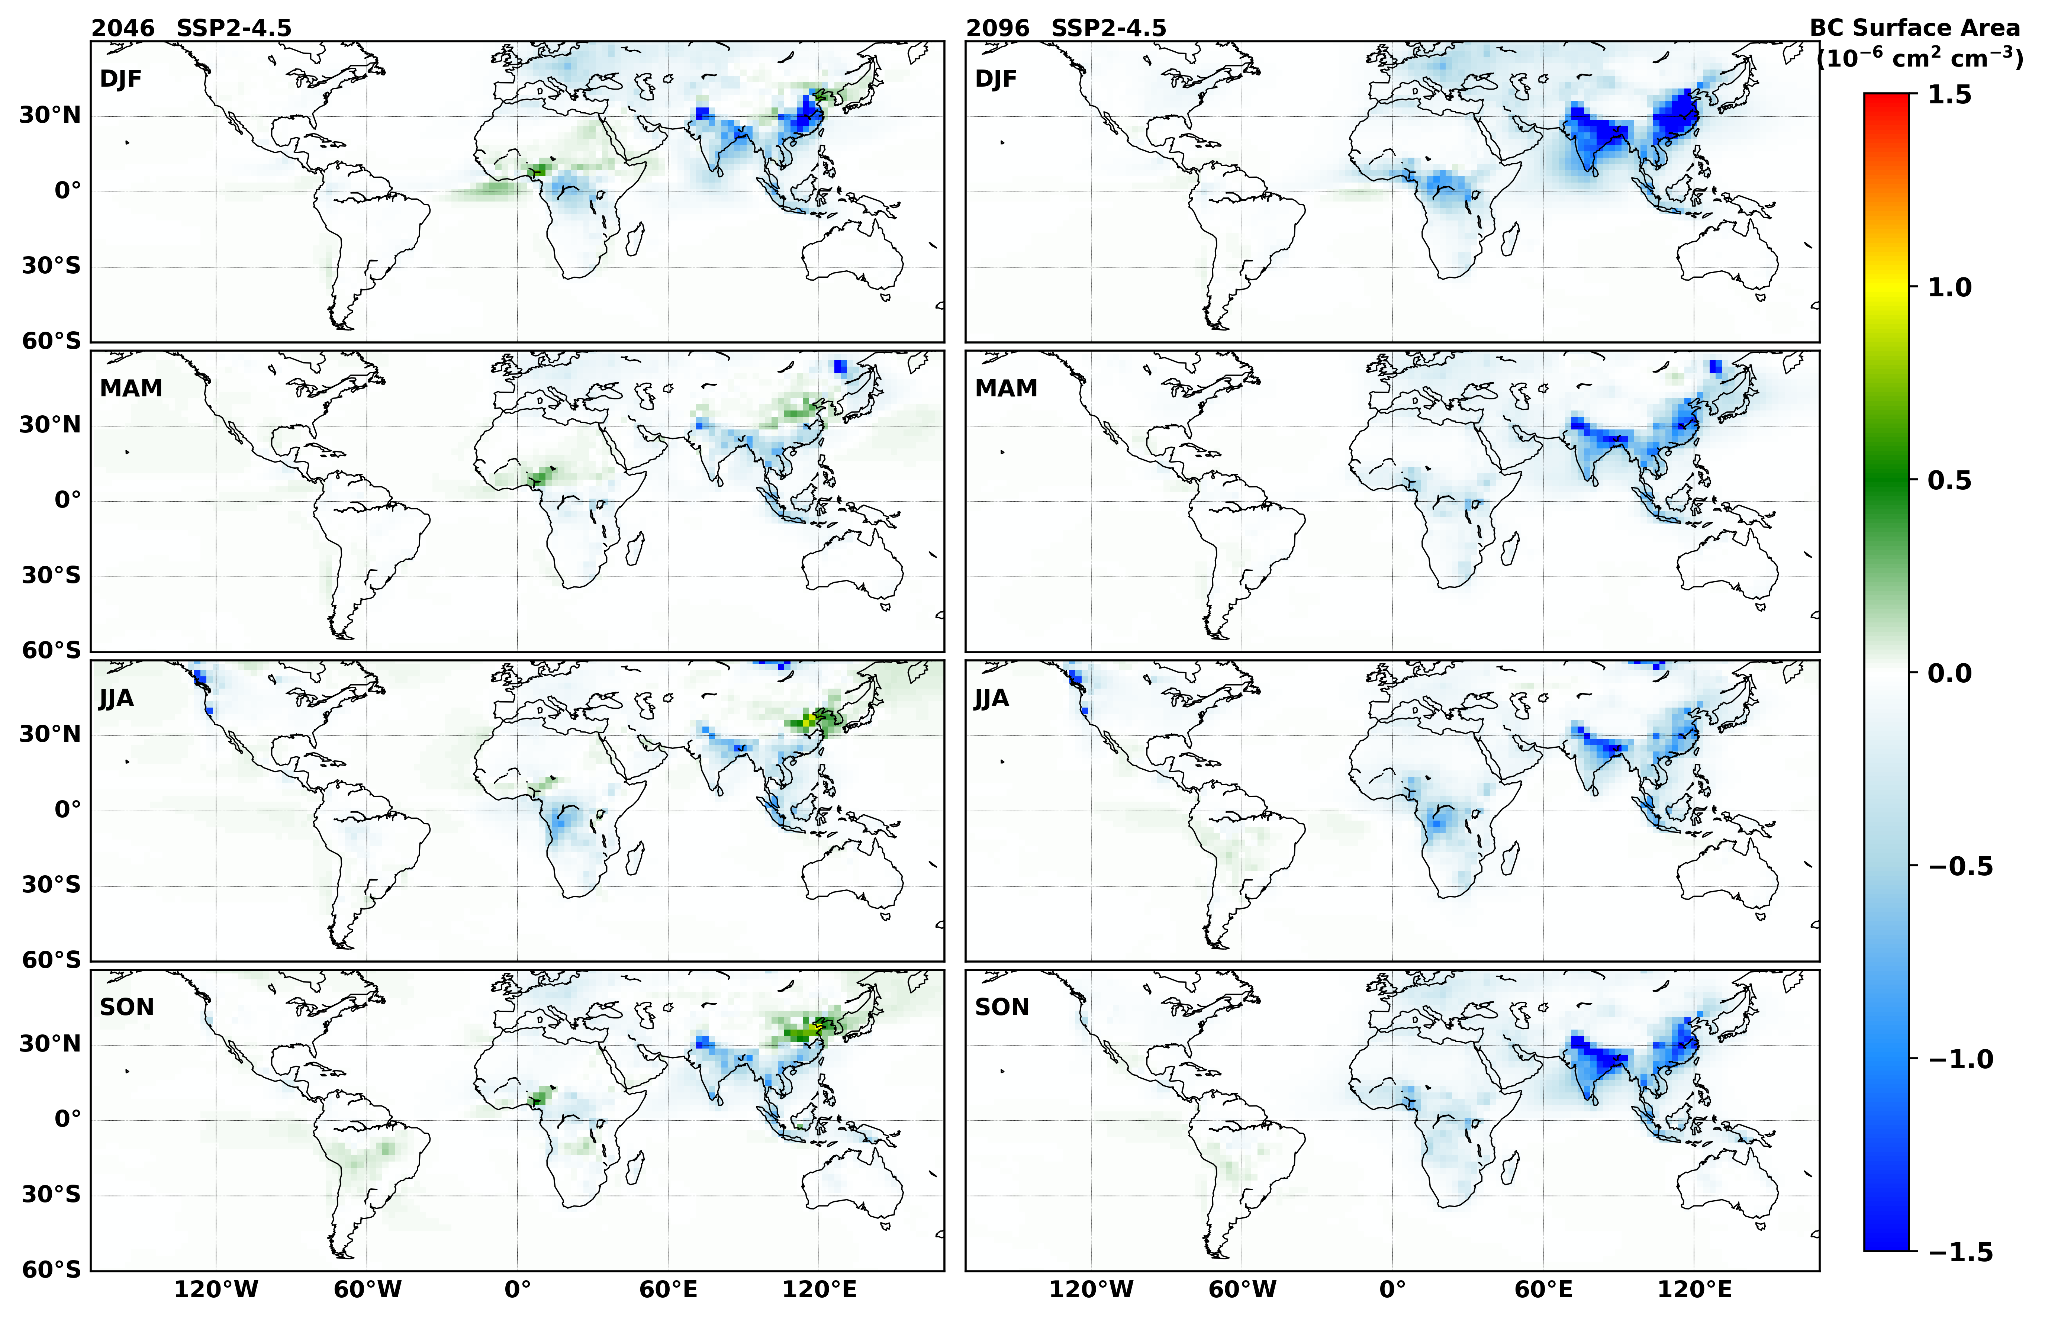
**

**Supplementary Fig. 10|** The change in Black Carbon Aerosol surface area density in SSP 2-4.5 for **[left]** 2046 and **[right]** 2096 when compared to that of 2018.

**
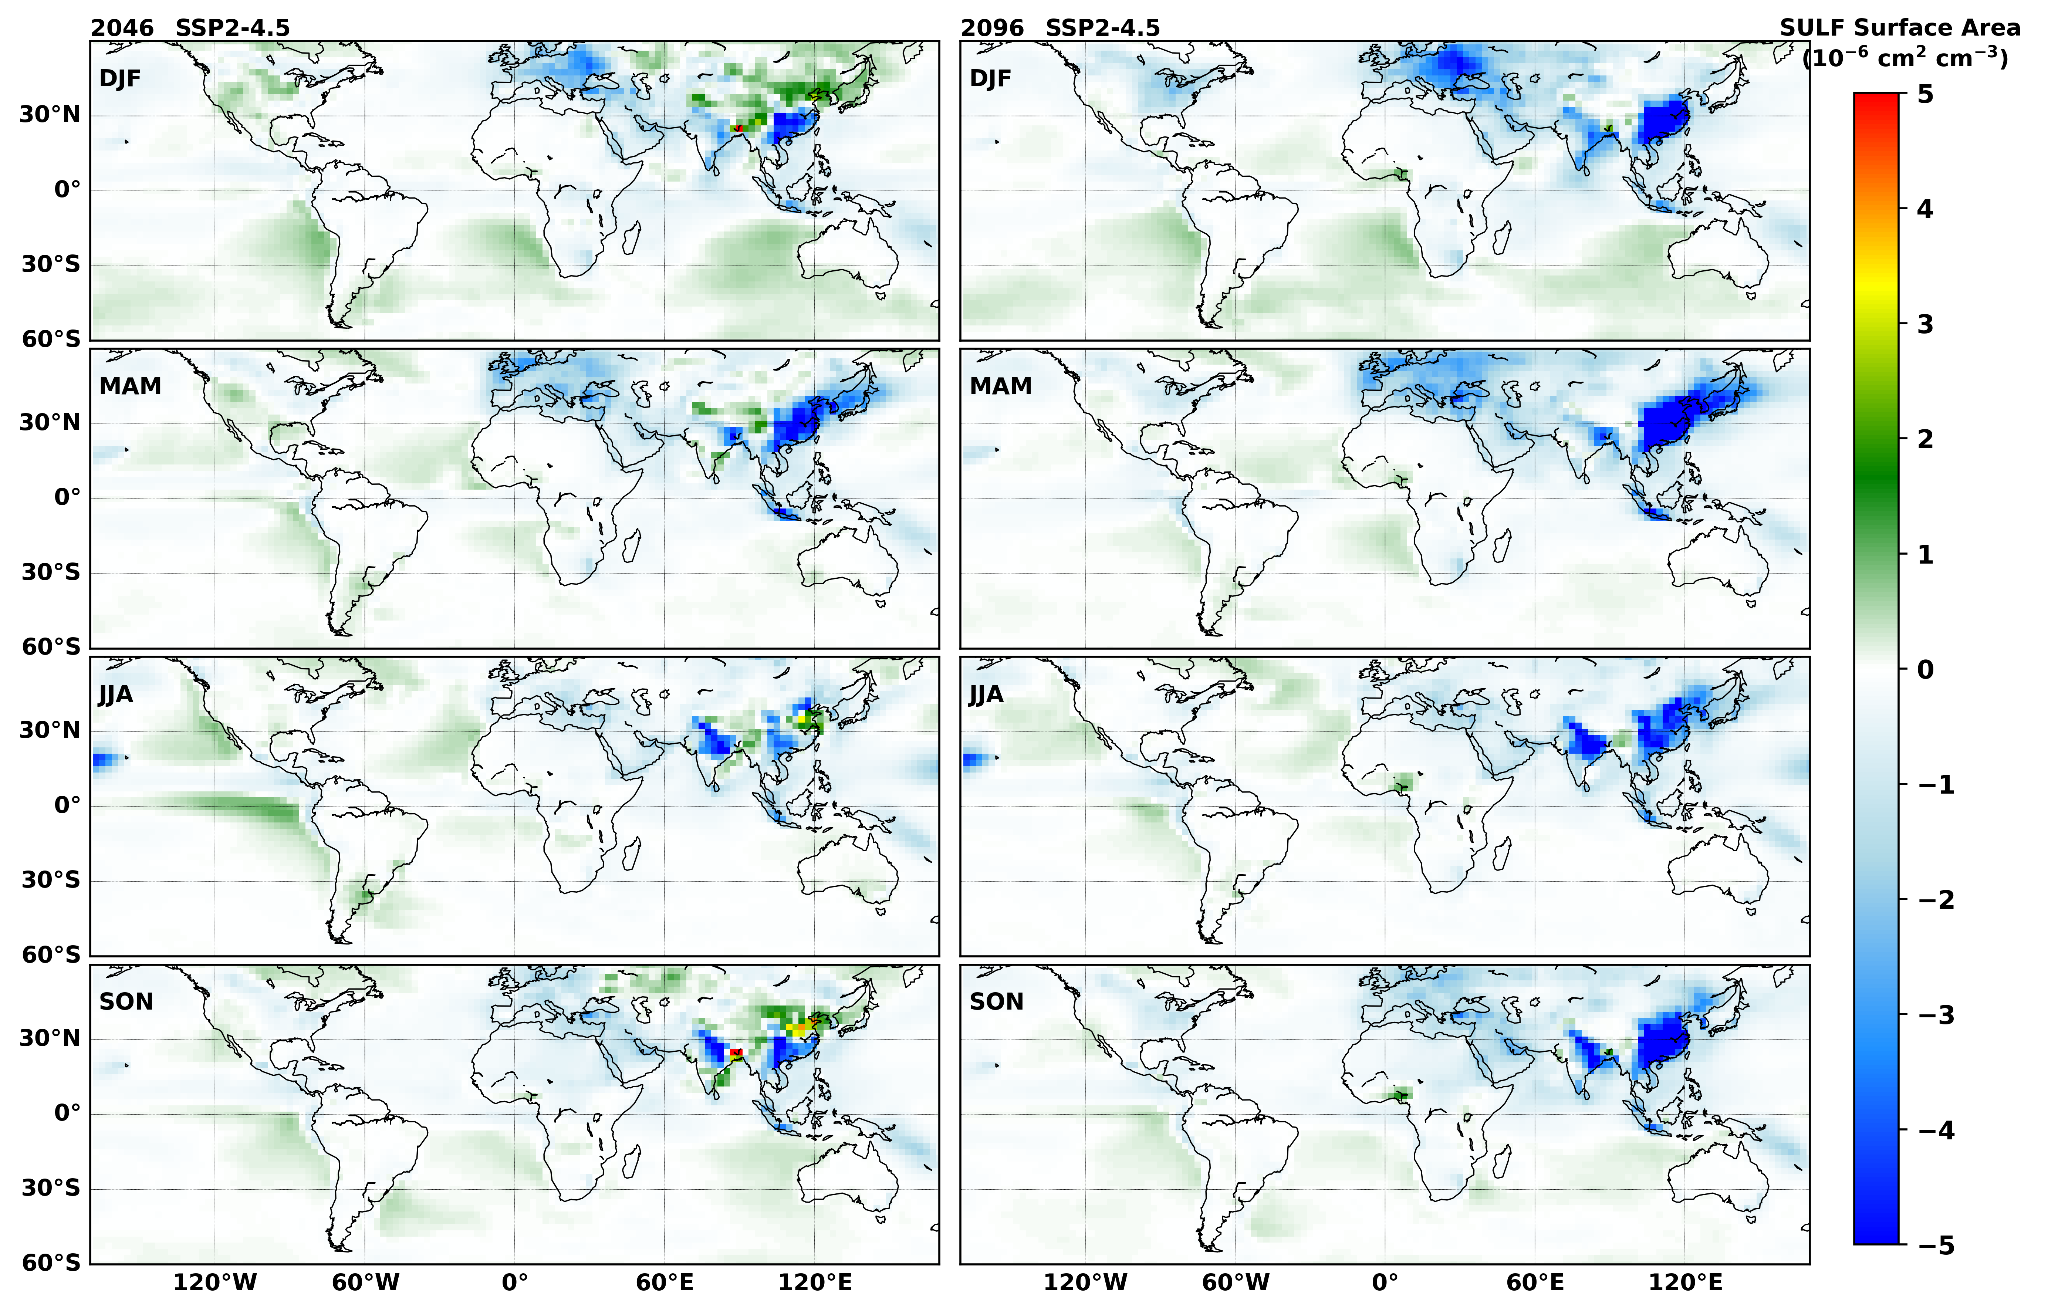
**

**Supplementary Fig. 11|** The change in Sulphate Aerosol surface area density in SSP 2-4.5 for **[left]** 2046 and **[right]** 2096 when compared to that of 2018.


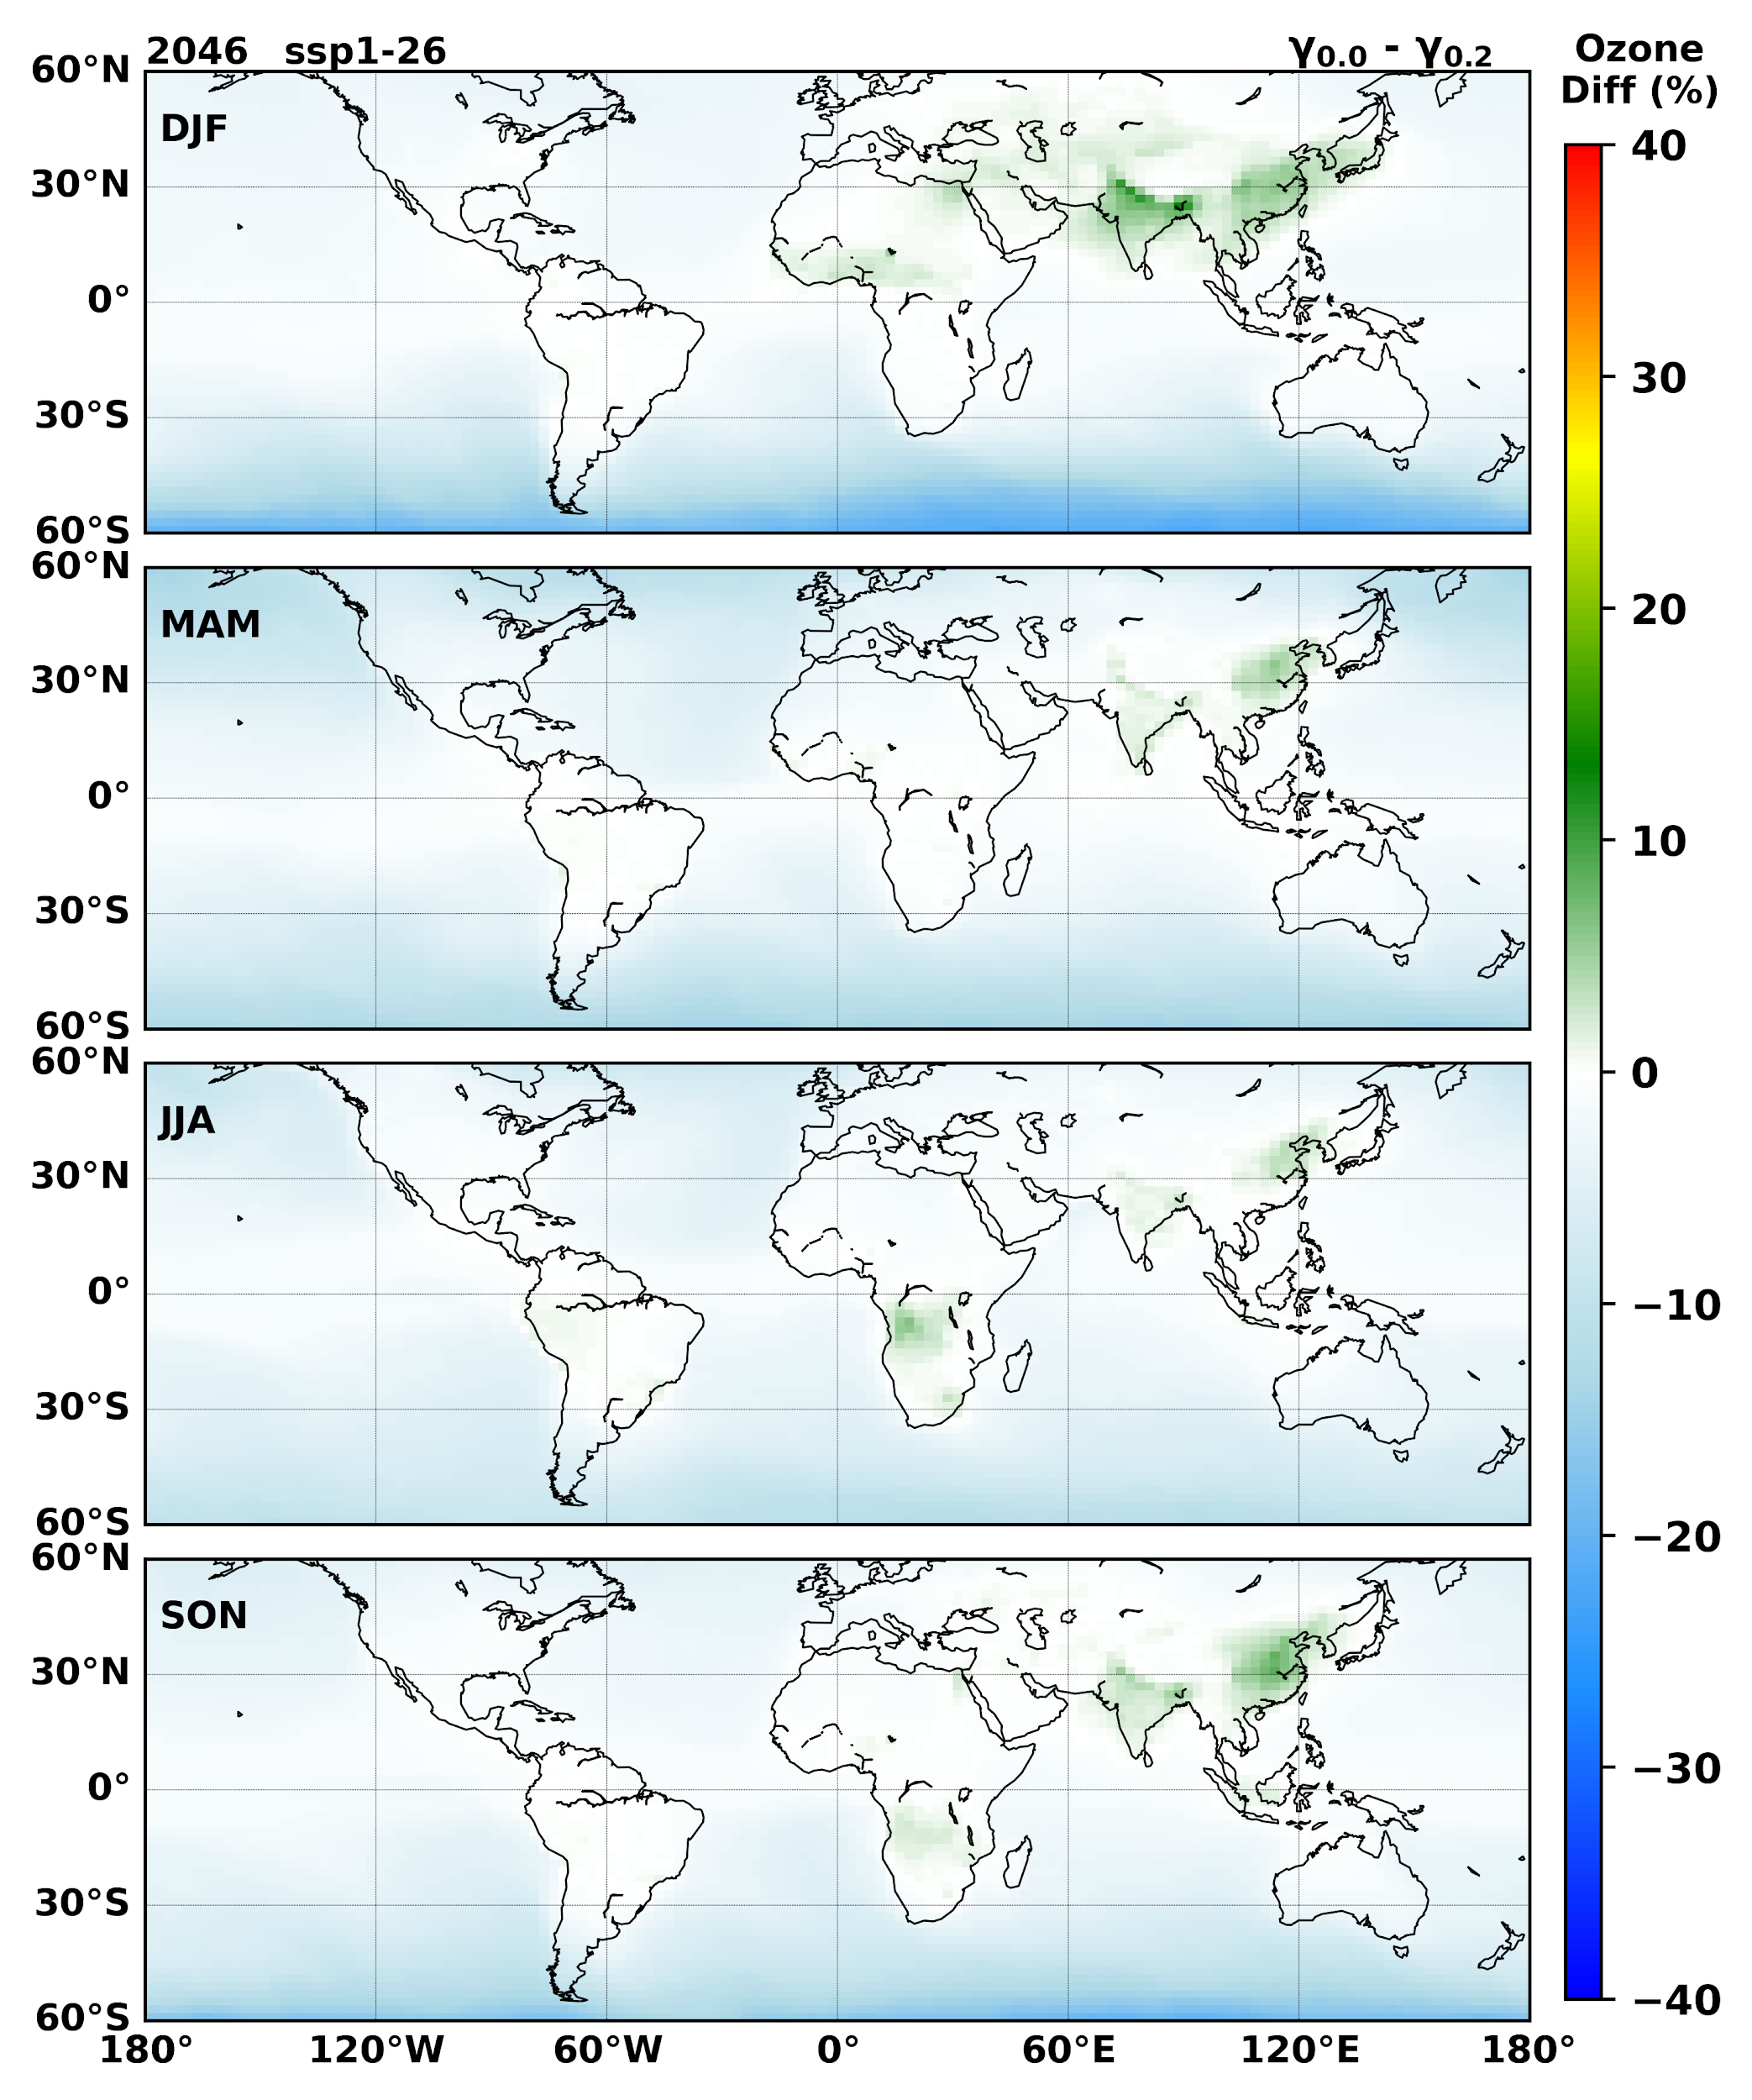


**Supplementary Fig. 12|** The percentage change in surface ozone between 0 aerosol uptake and 0.2 aerosol uptake values for the SSP 1-2.6 scenario in 2046.


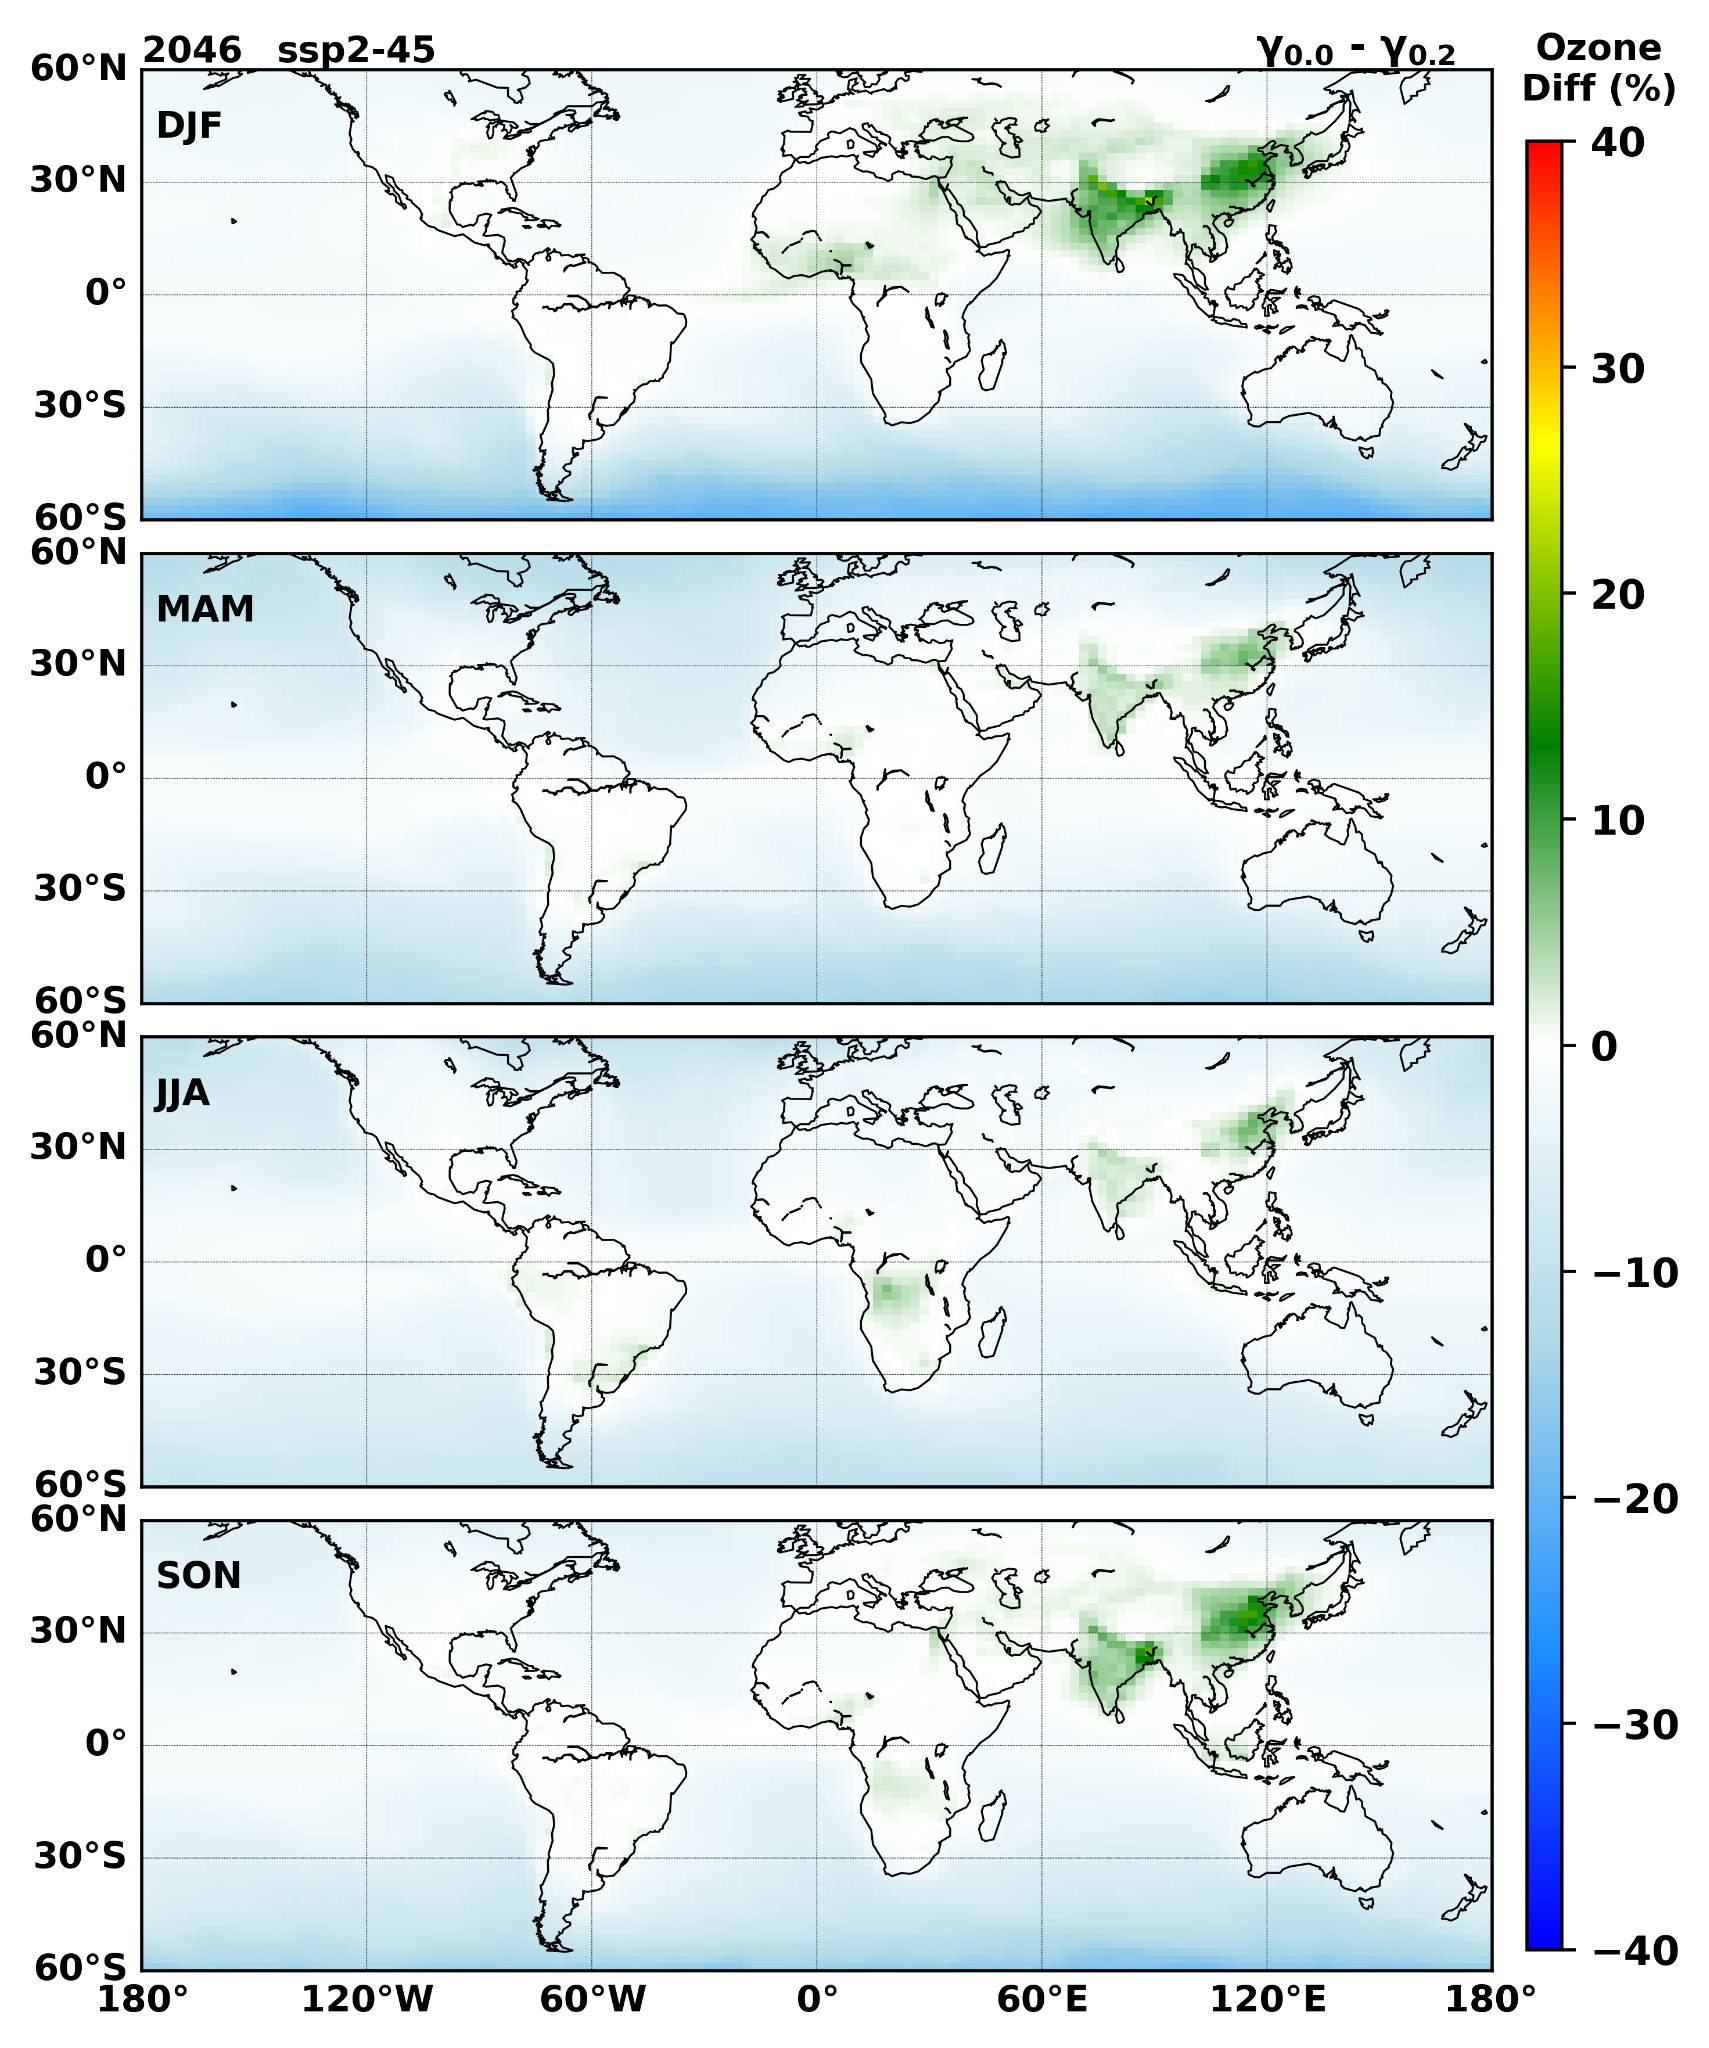


**Supplementary Fig. 13|** The percentage change in surface ozone between 0 aerosol uptake and 0.2 aerosol uptake values for the SSP 2-4.5 scenario in 2046.


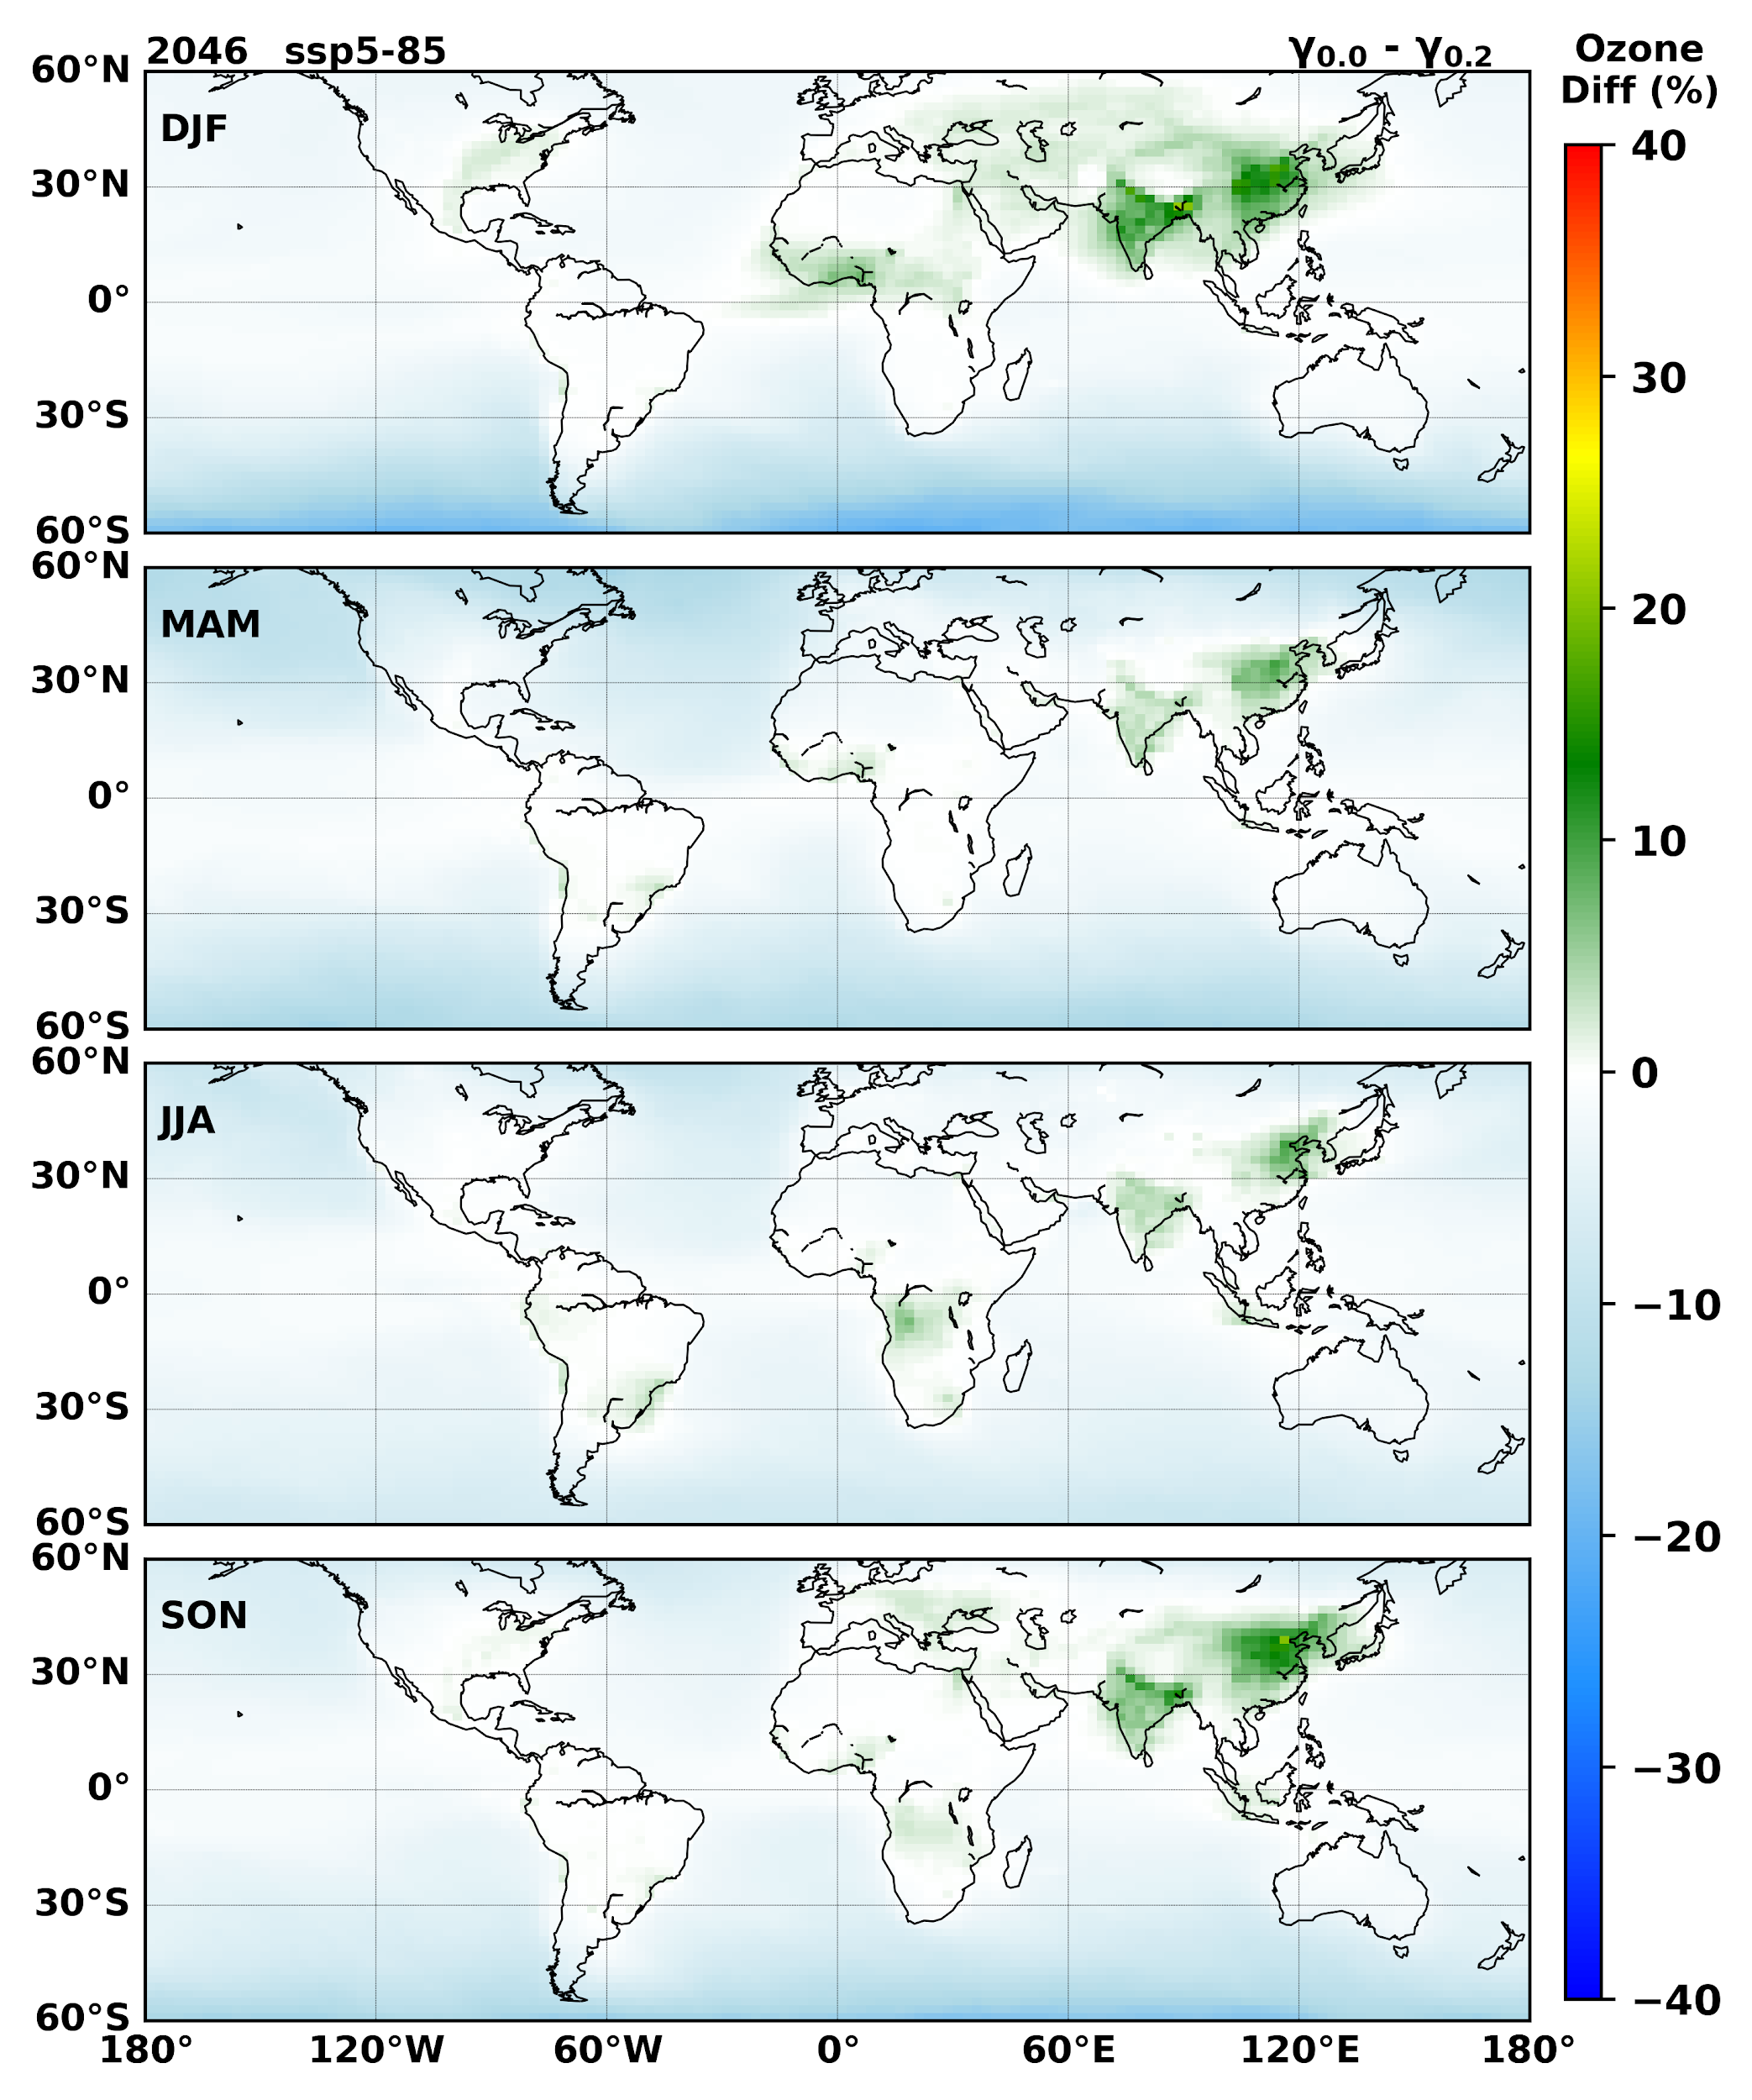


**Supplementary Fig. 14|** The percentage change in surface ozone between 0 aerosol uptake and 0.2 aerosol uptake values for the SSP 5-8.5 scenario in 2046.


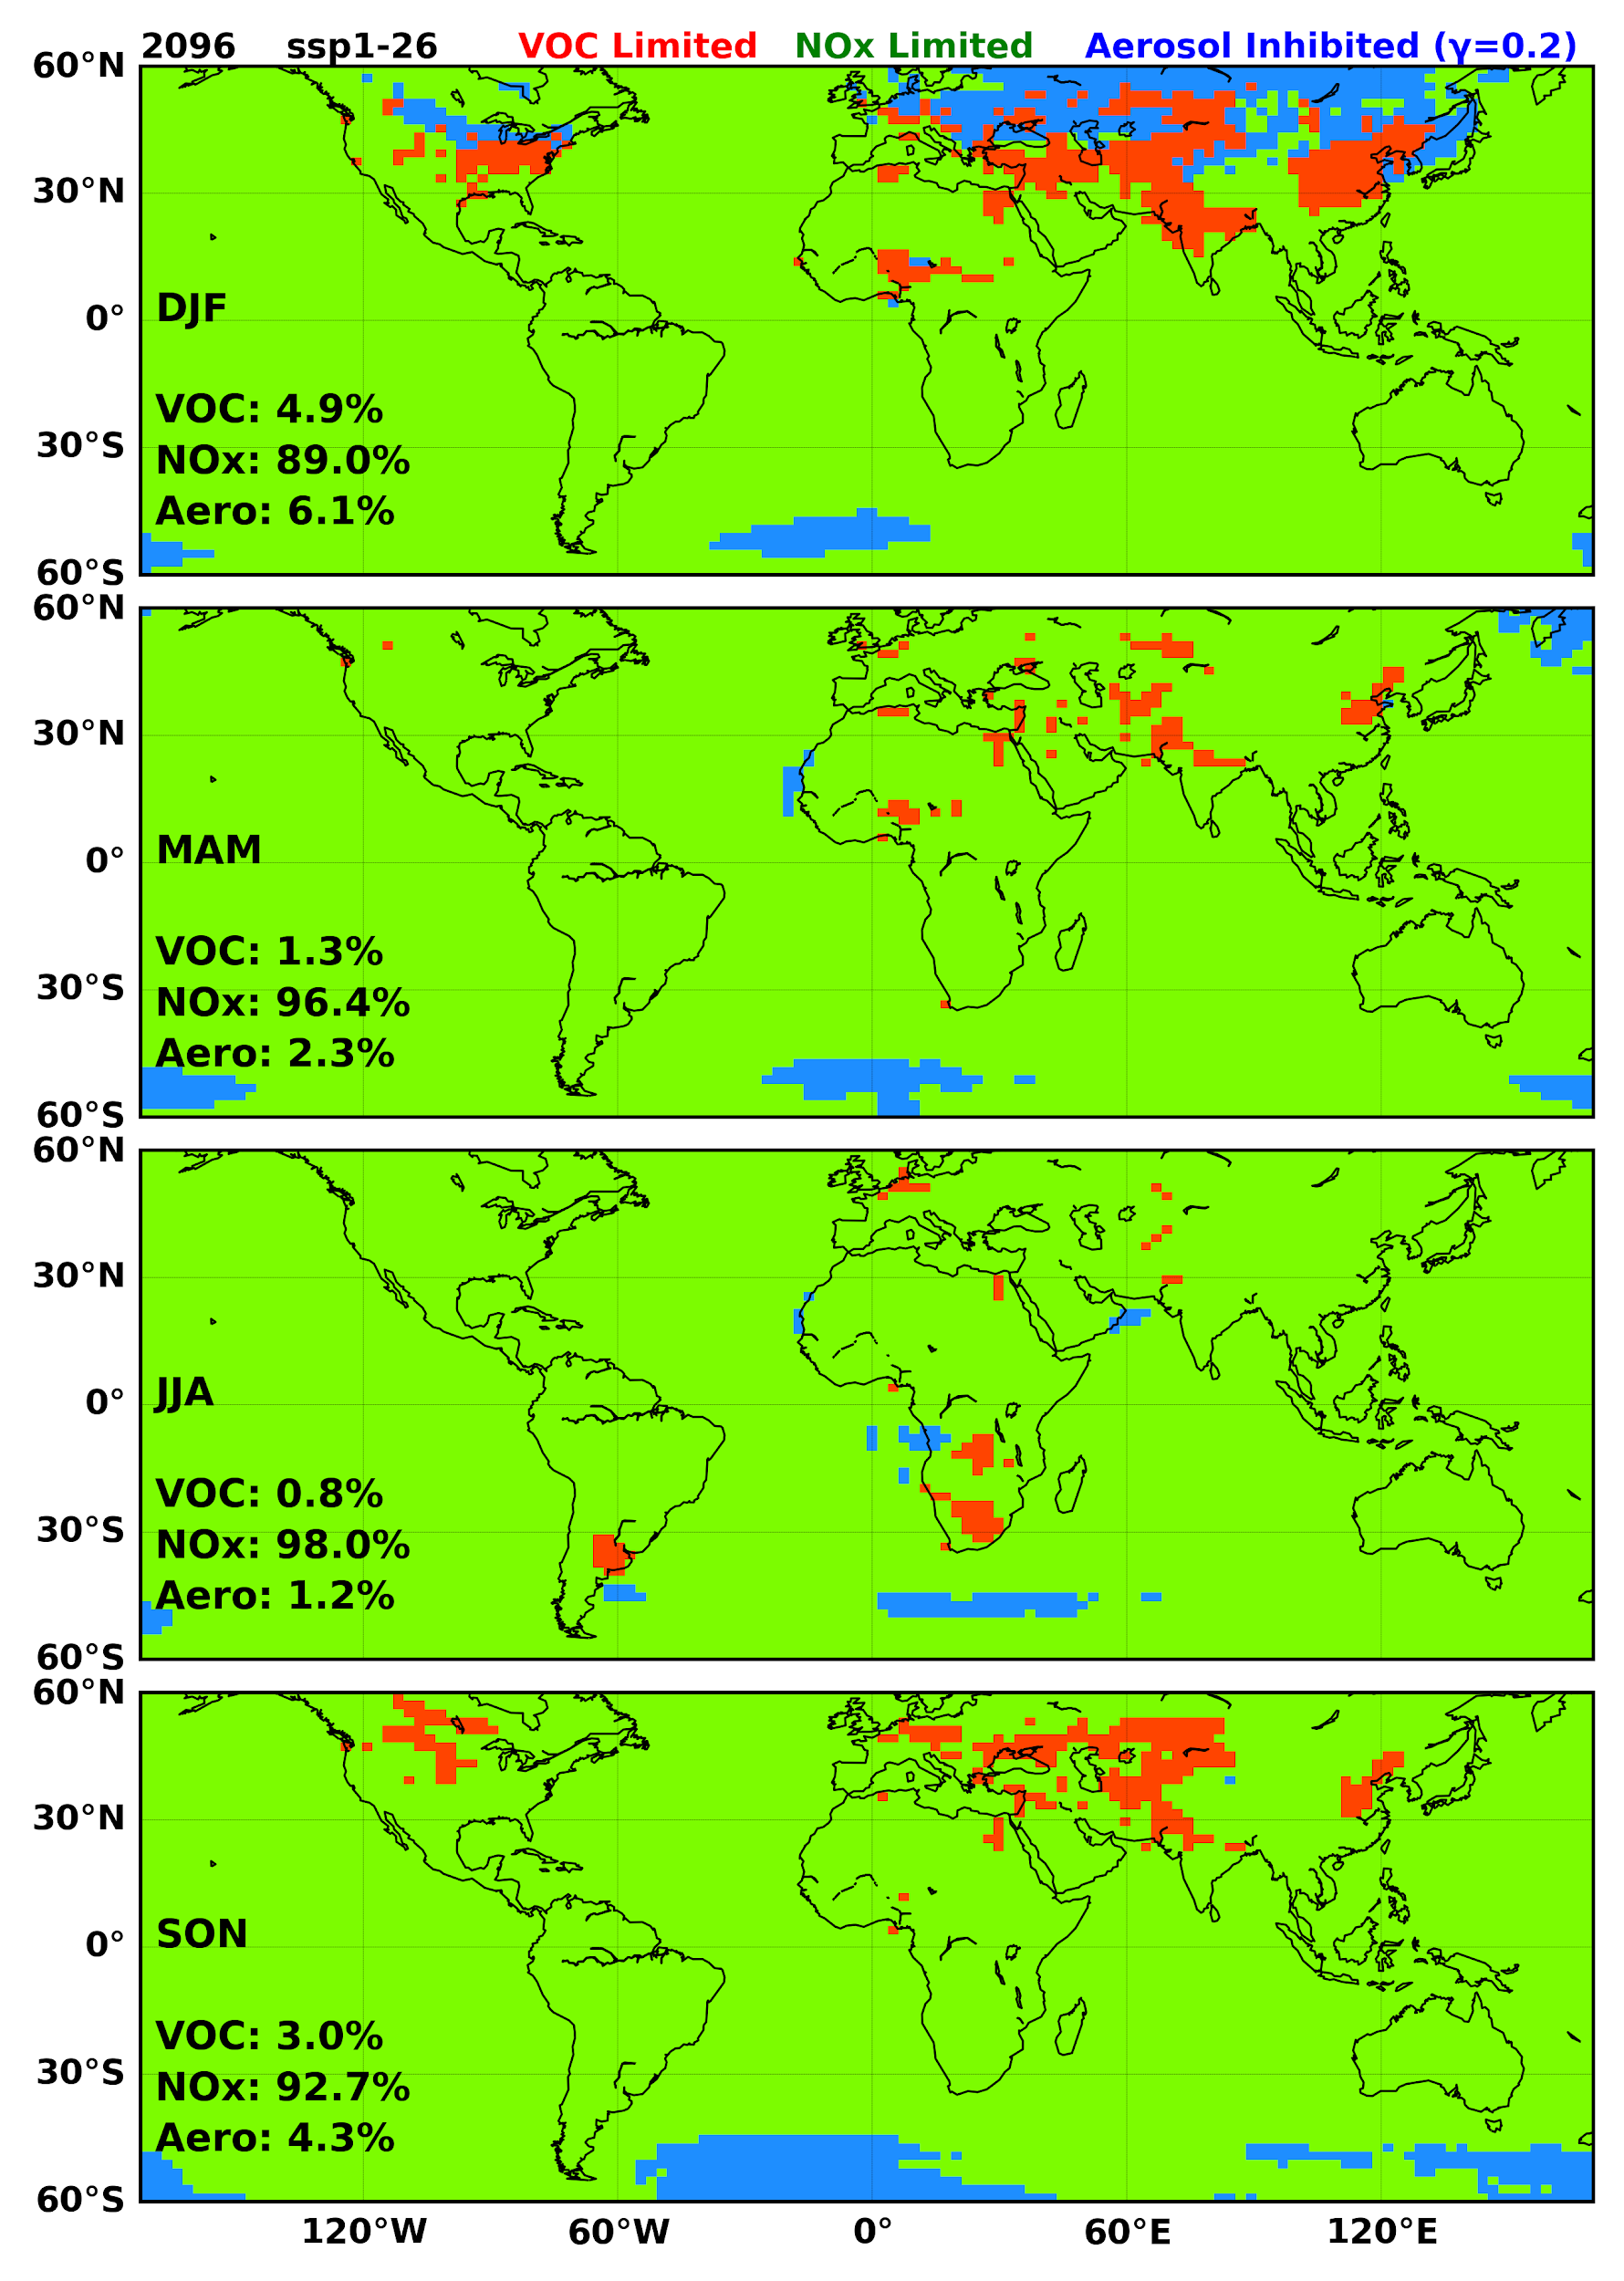


**Supplementary Fig. 15|** The regional distribution of ozone generation photochemical regimes modelled with an aerosol uptake coefficient of 0.2 in the SSP 1-2.6 scenario for 2096.


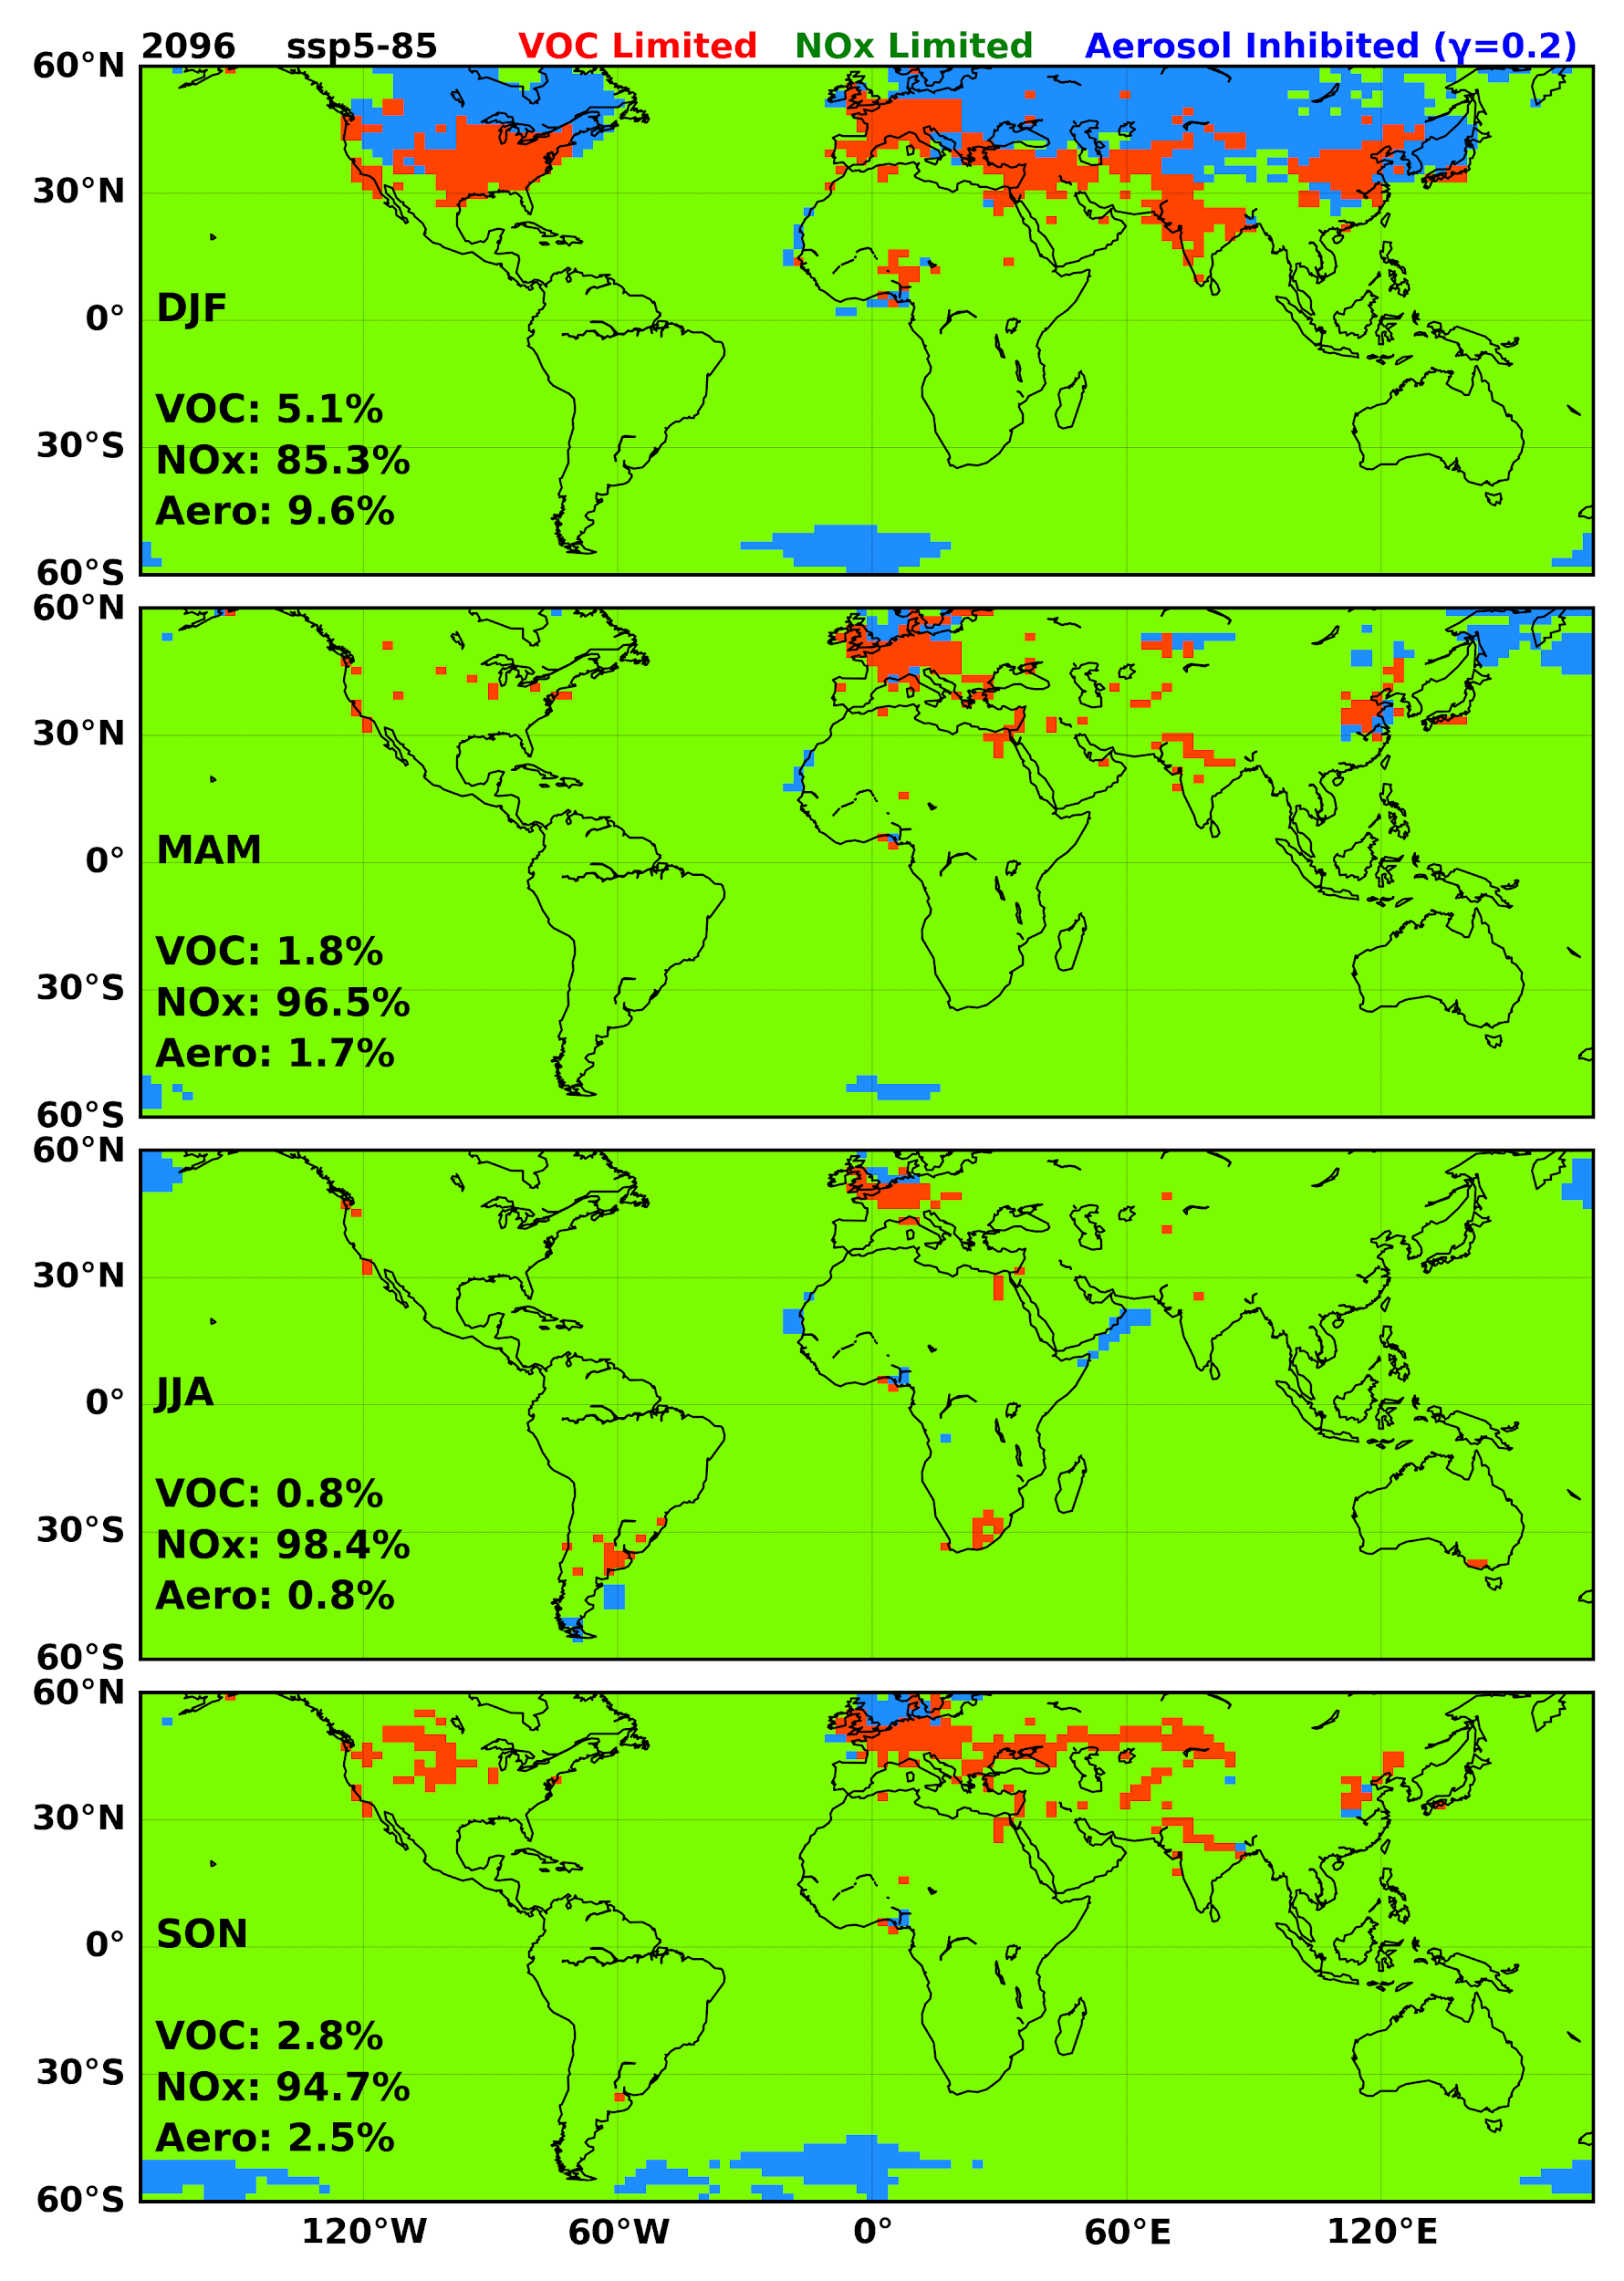


**Supplementary Fig. 16|** The regional distribution of ozone generation photochemical regimes modelled with an aerosol uptake coefficient of 0.2 in the SSP 5-8.5 scenario for 2096


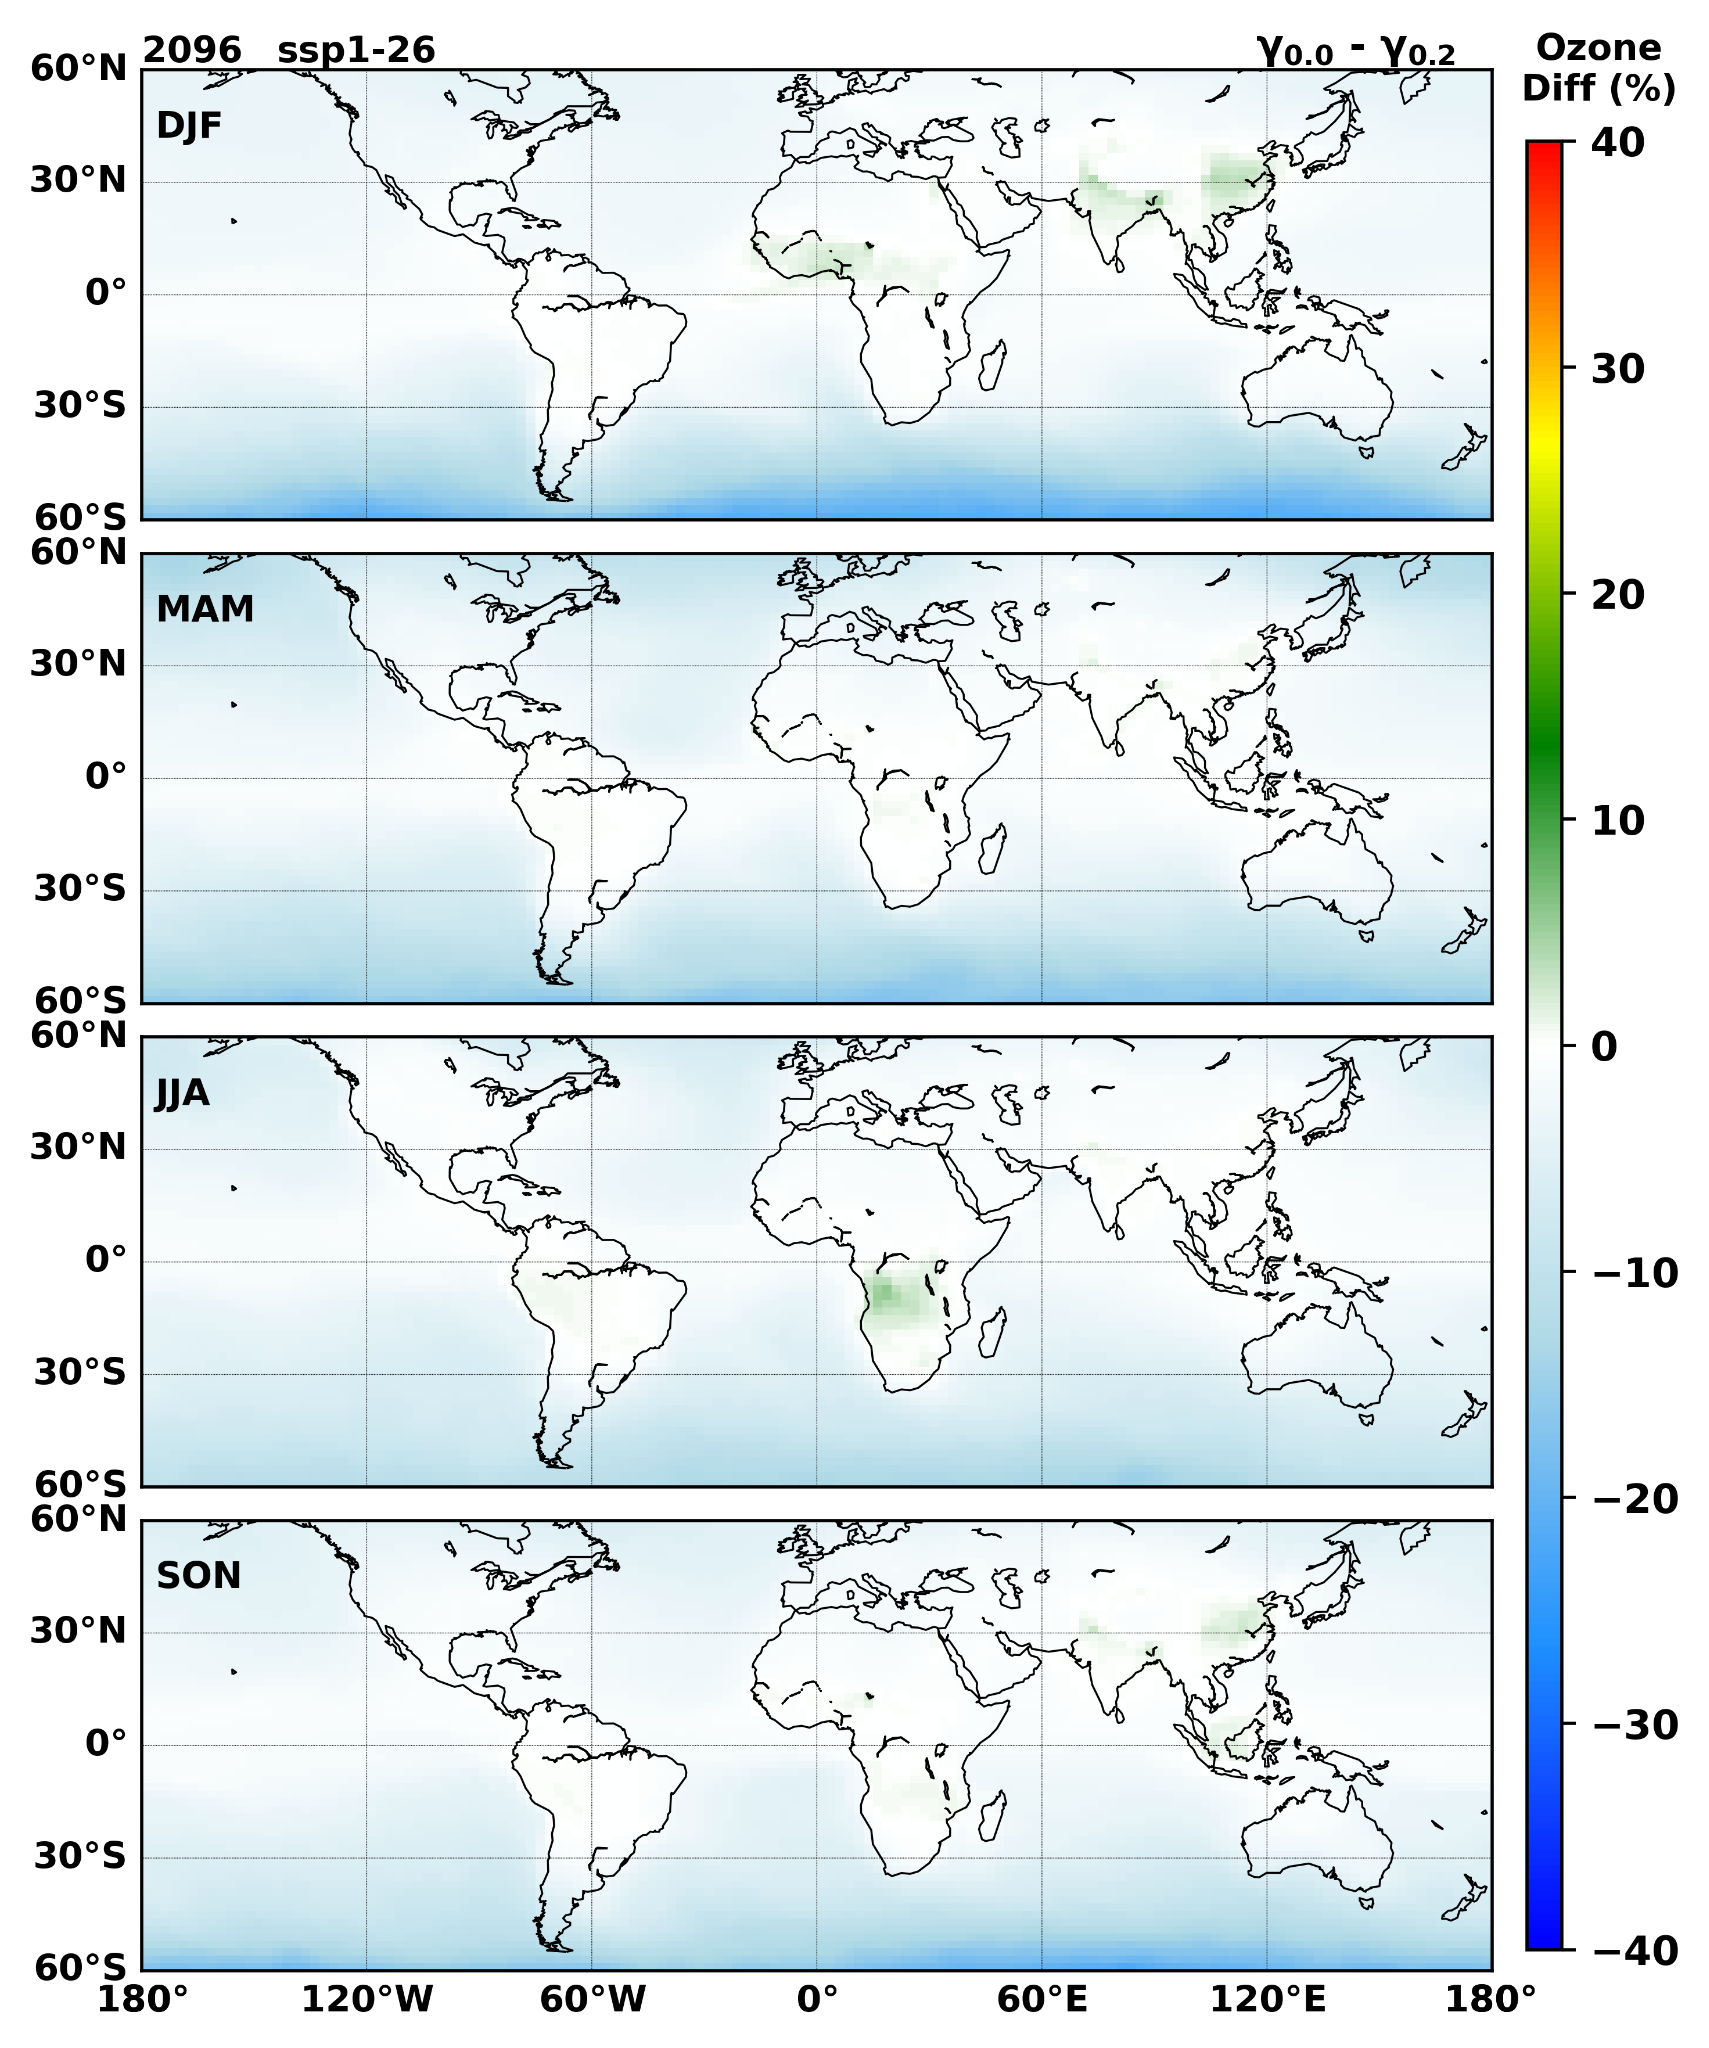


**Supplementary Fig. 17|** The percentage change in surface ozone between 0 aerosol uptake and 0.2 aerosol uptake values for the SSP 1-2.6 scenario in 2096.


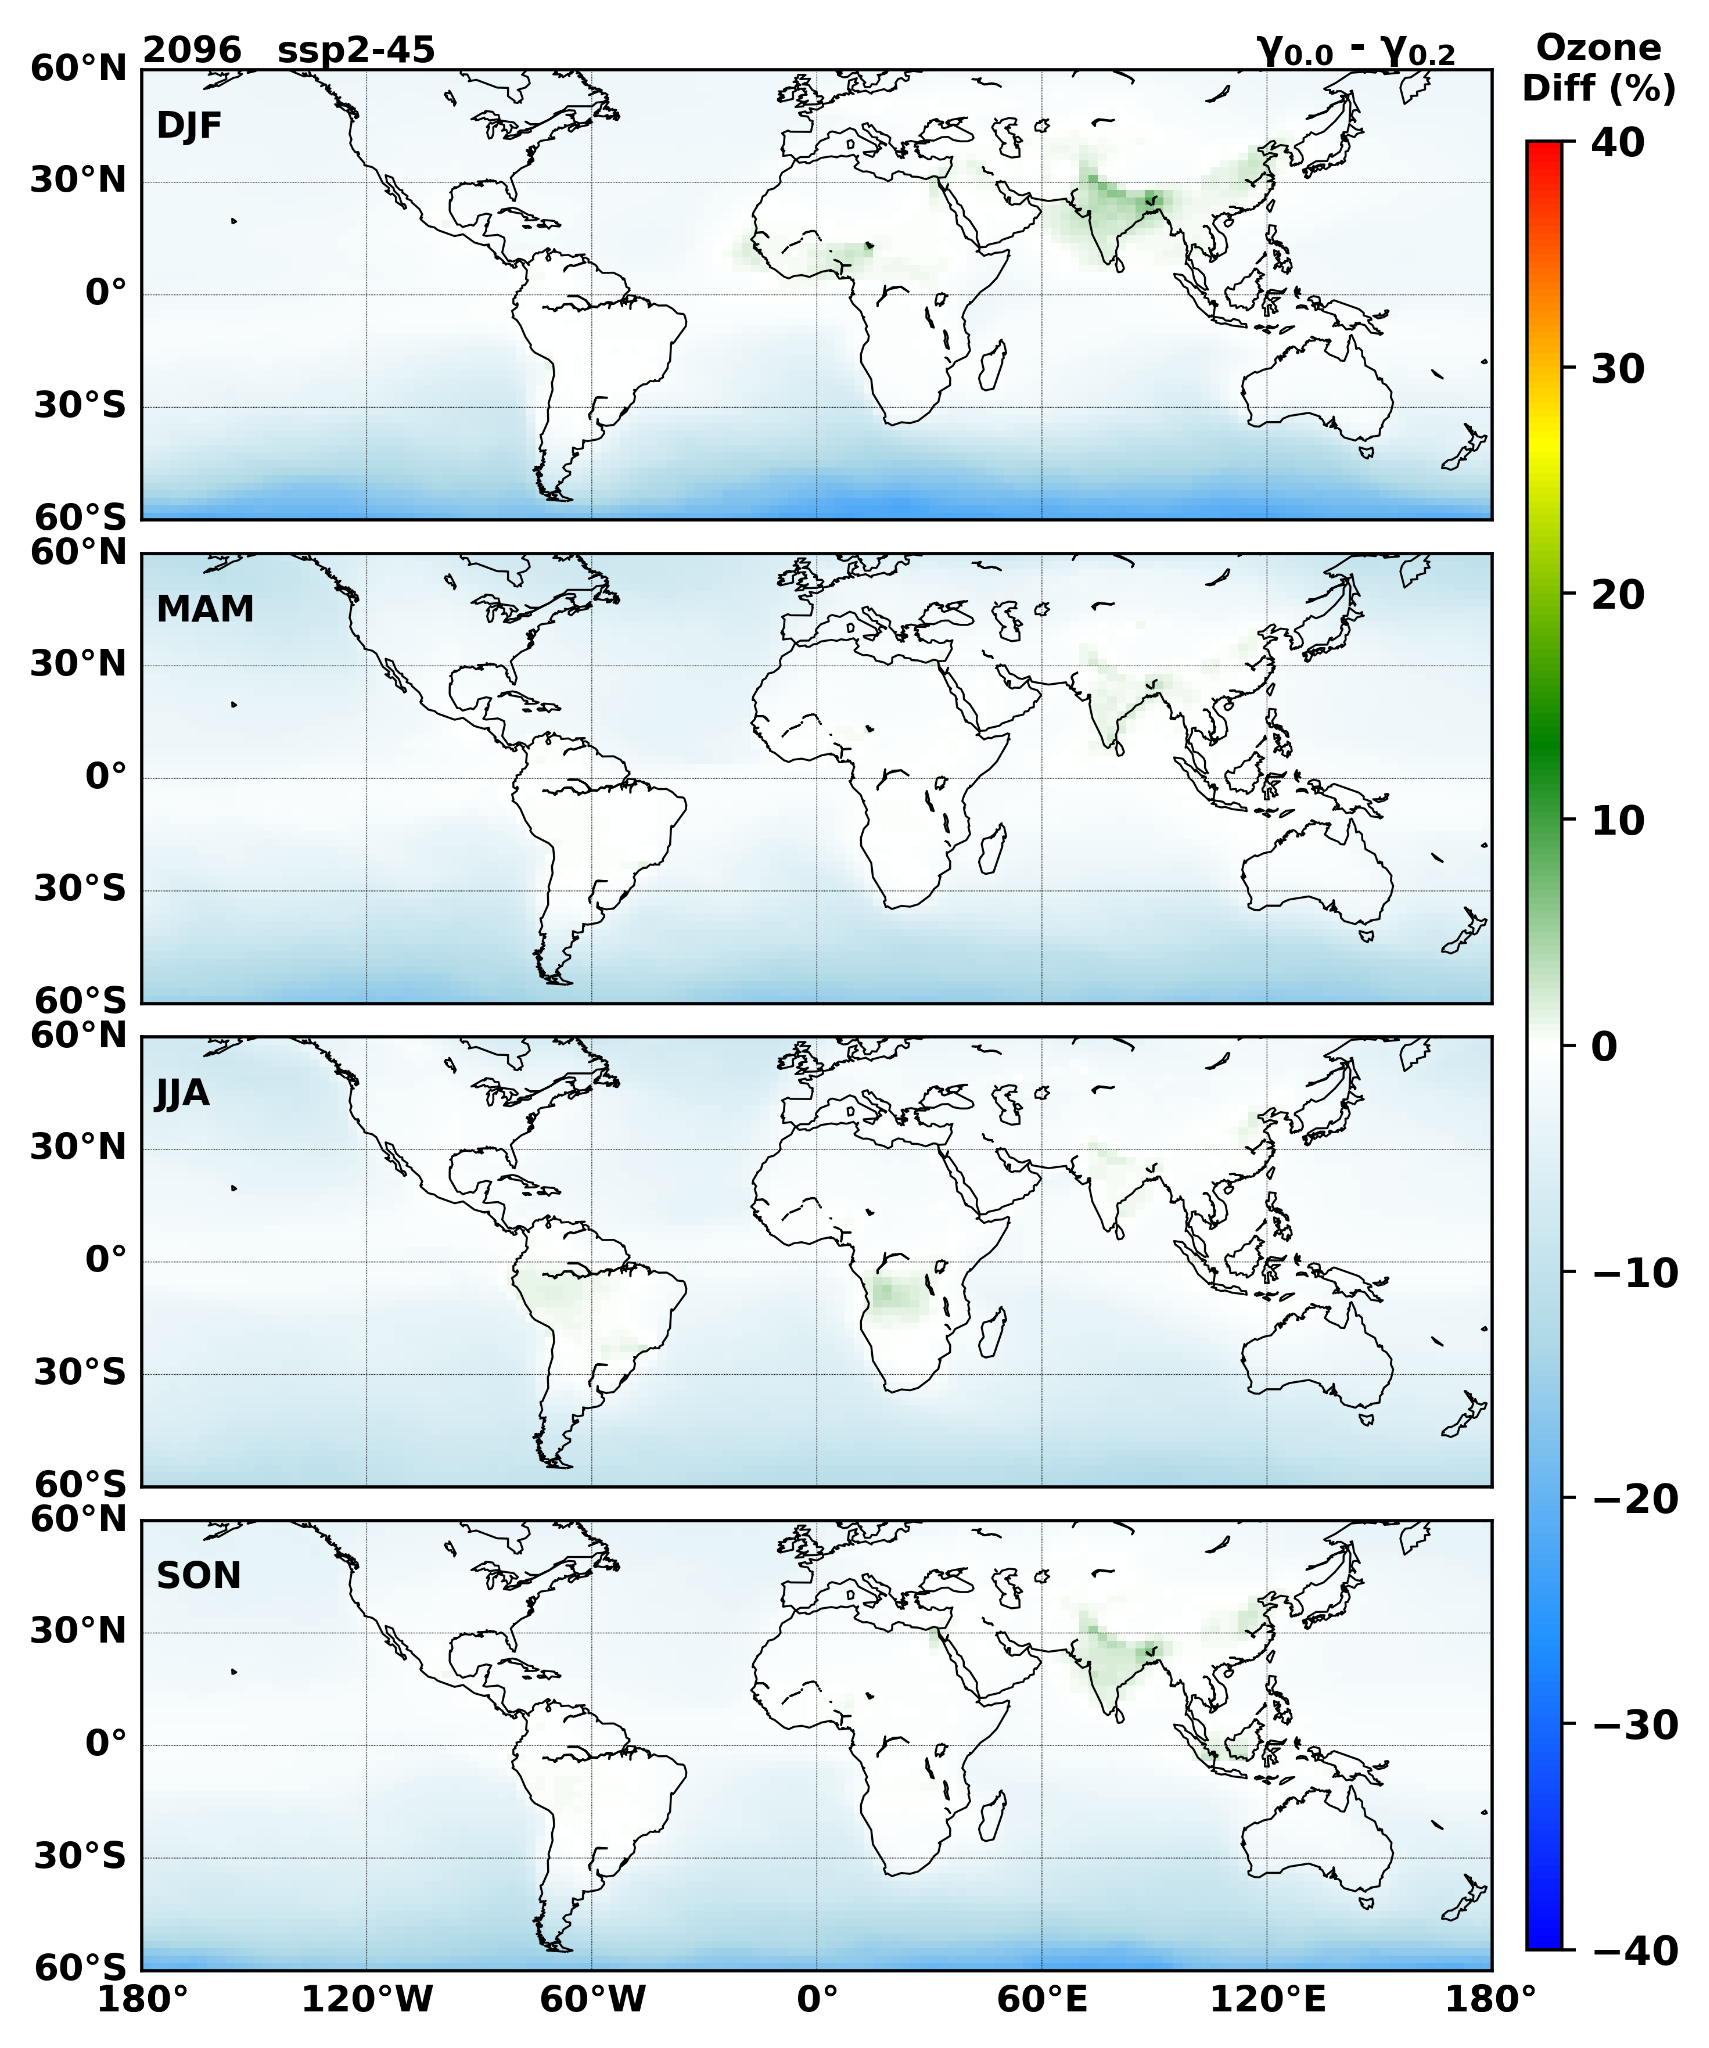


**Supplementary Fig. 18|** The percentage change in surface ozone between 0 aerosol uptake and 0.2 aerosol uptake values for the SSP 2-4.5 scenario in 2096.


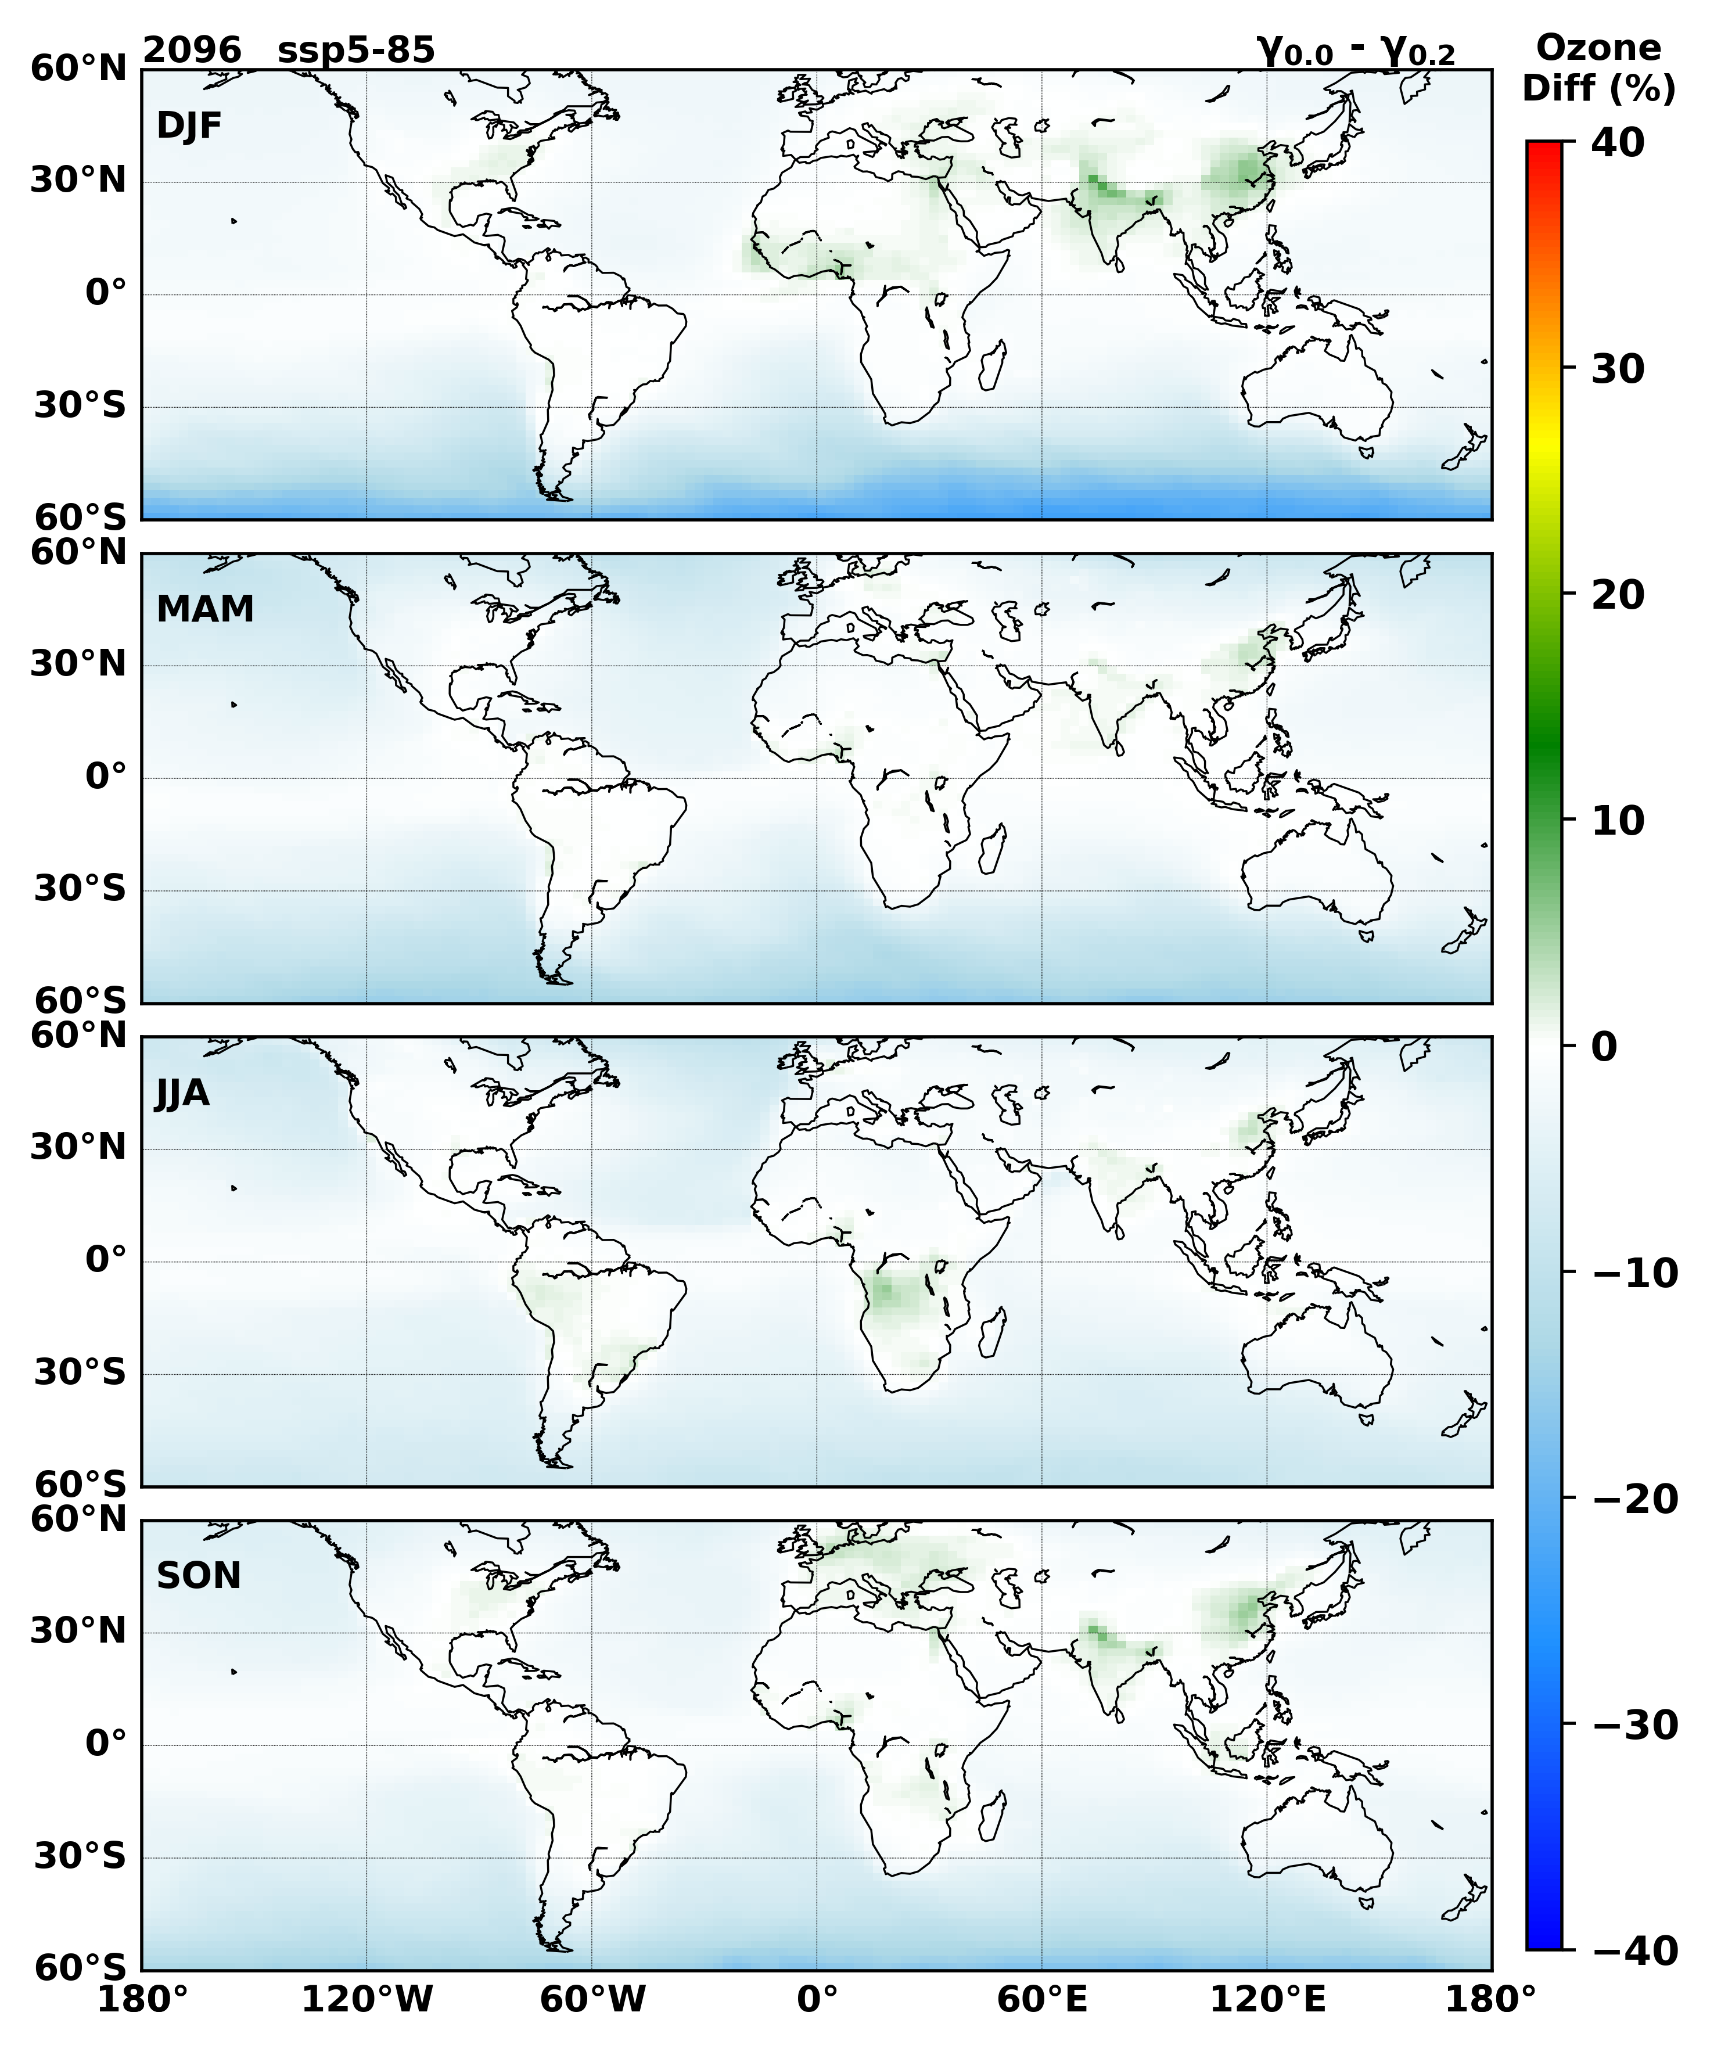


**Supplementary Fig. 19|** The percentage change in surface ozone between 0 aerosol uptake and 0.2 aerosol uptake values for the SSP 5-8.5 scenario in 2096.


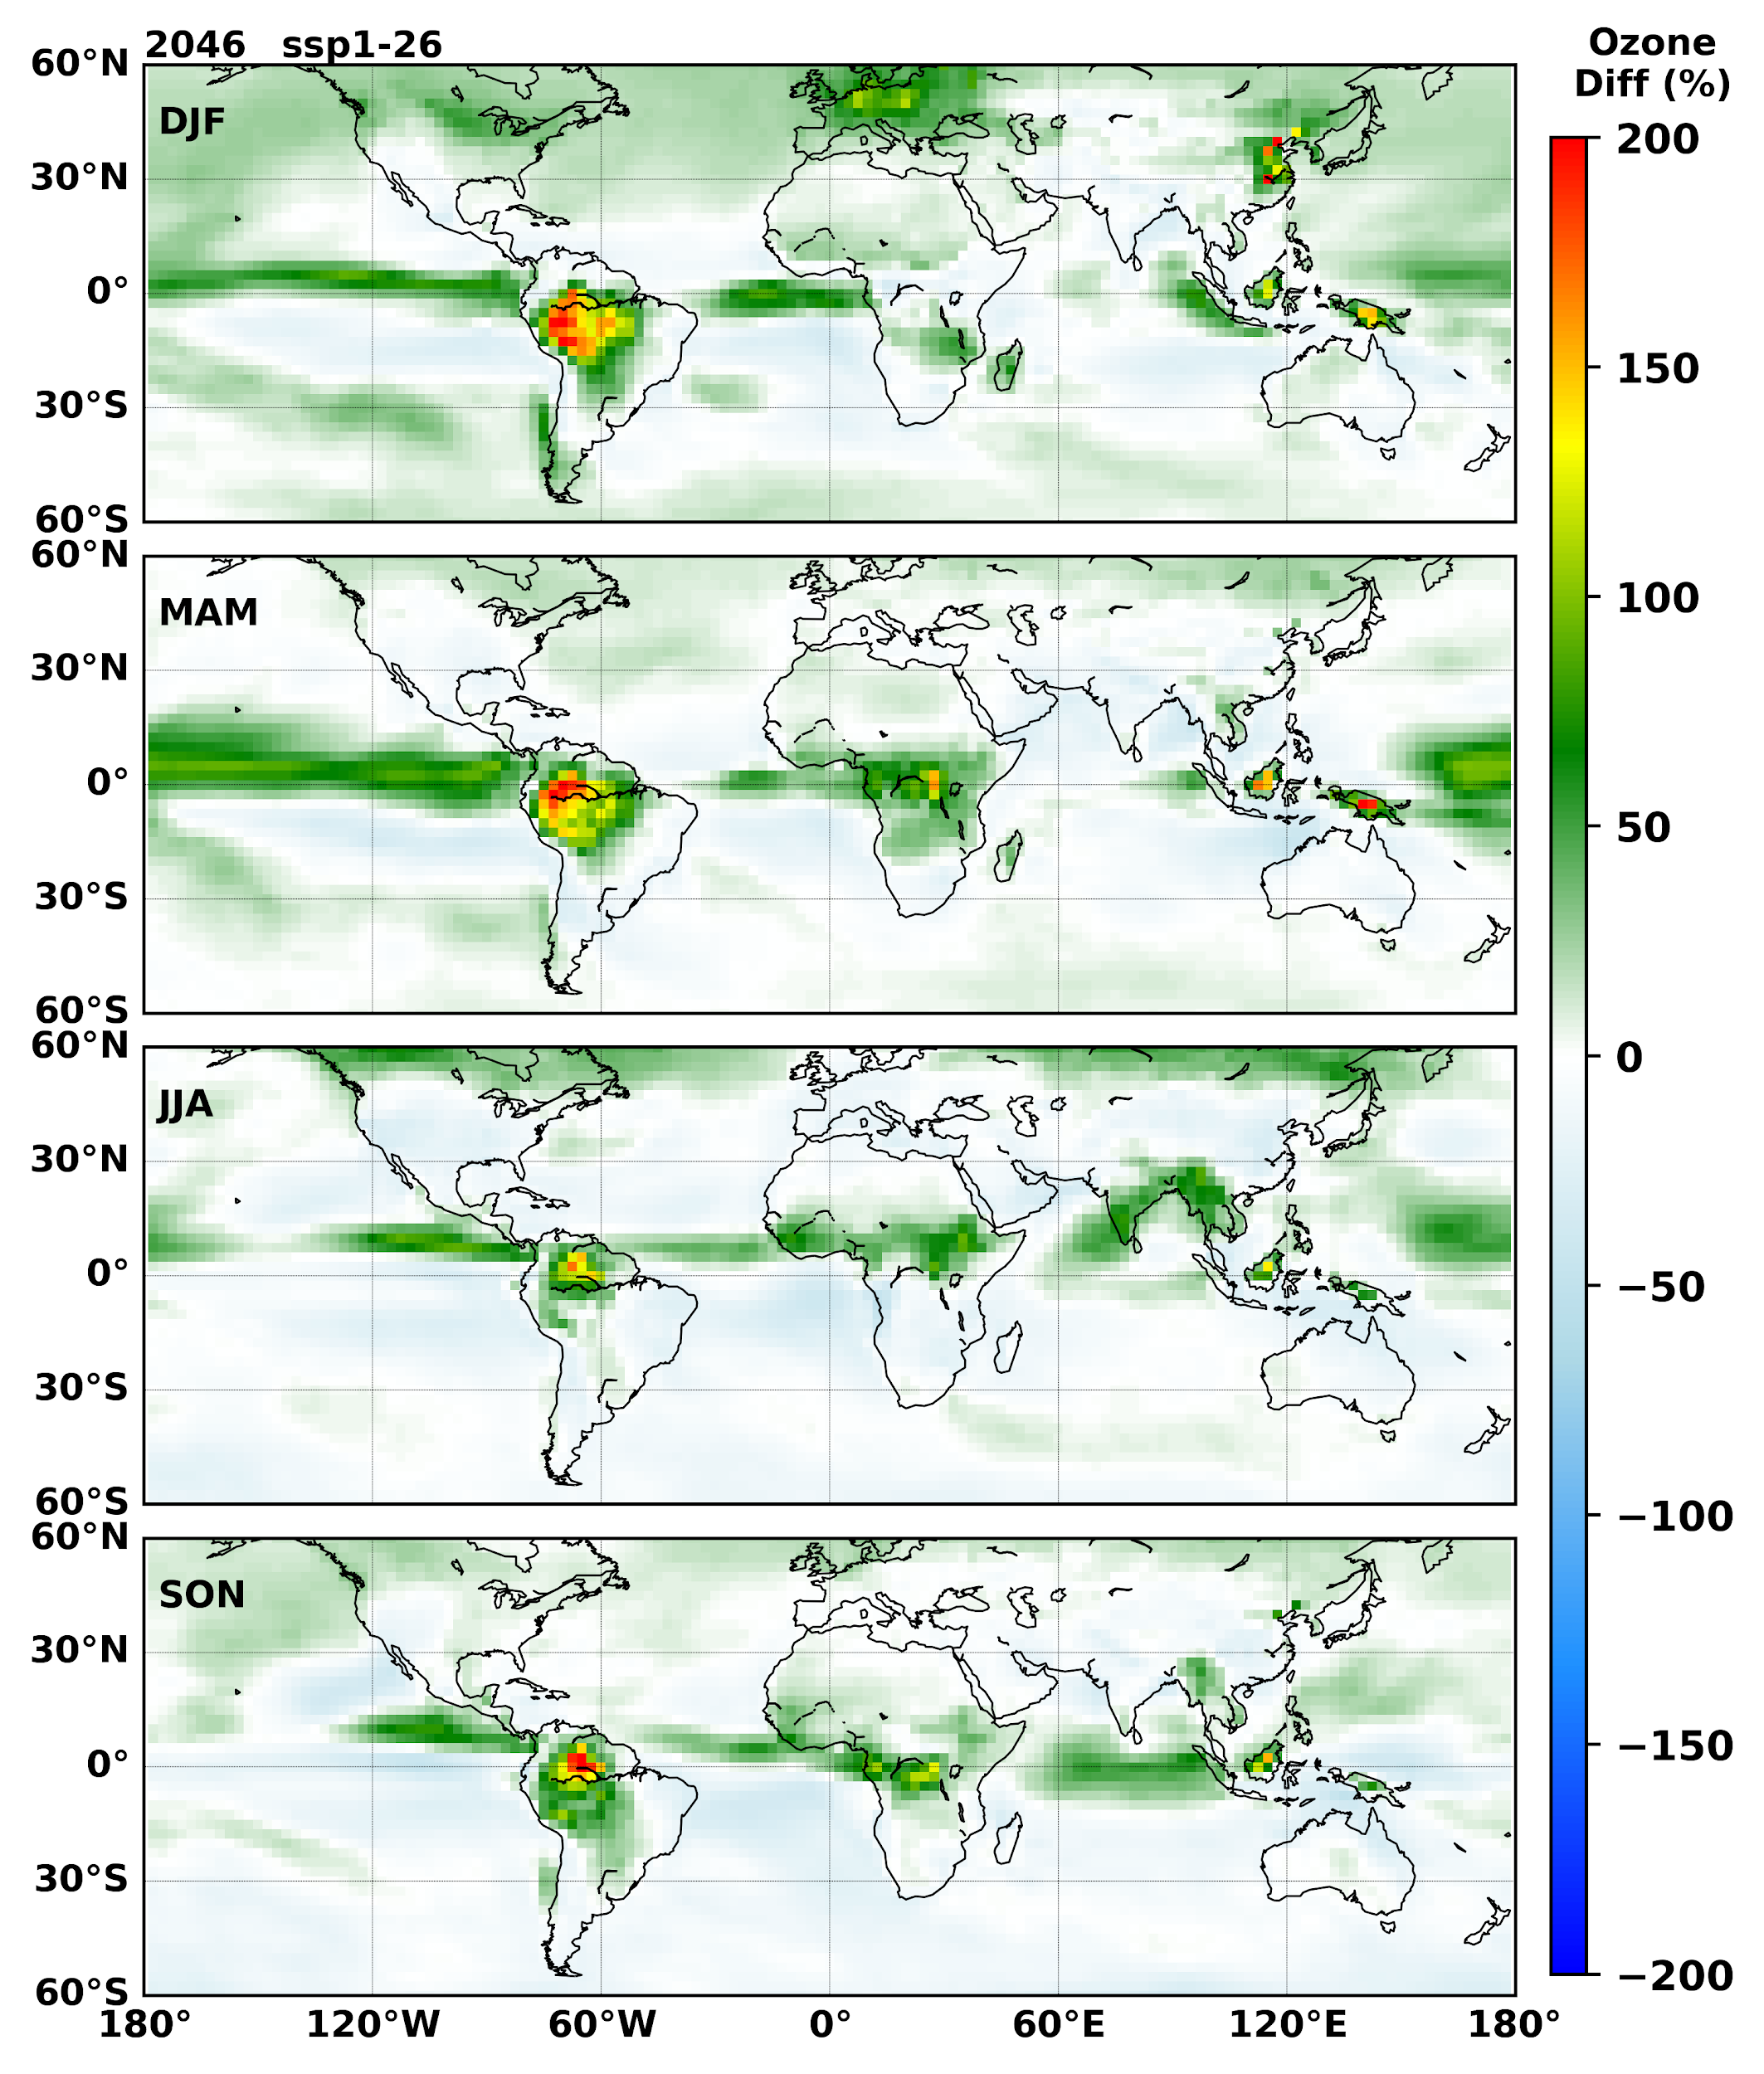


**Supplementary Fig. 20|** The percentage change in surface ozone for the year 2046 when compared to that of 2018 for the SSP 1-2.6 scenario.


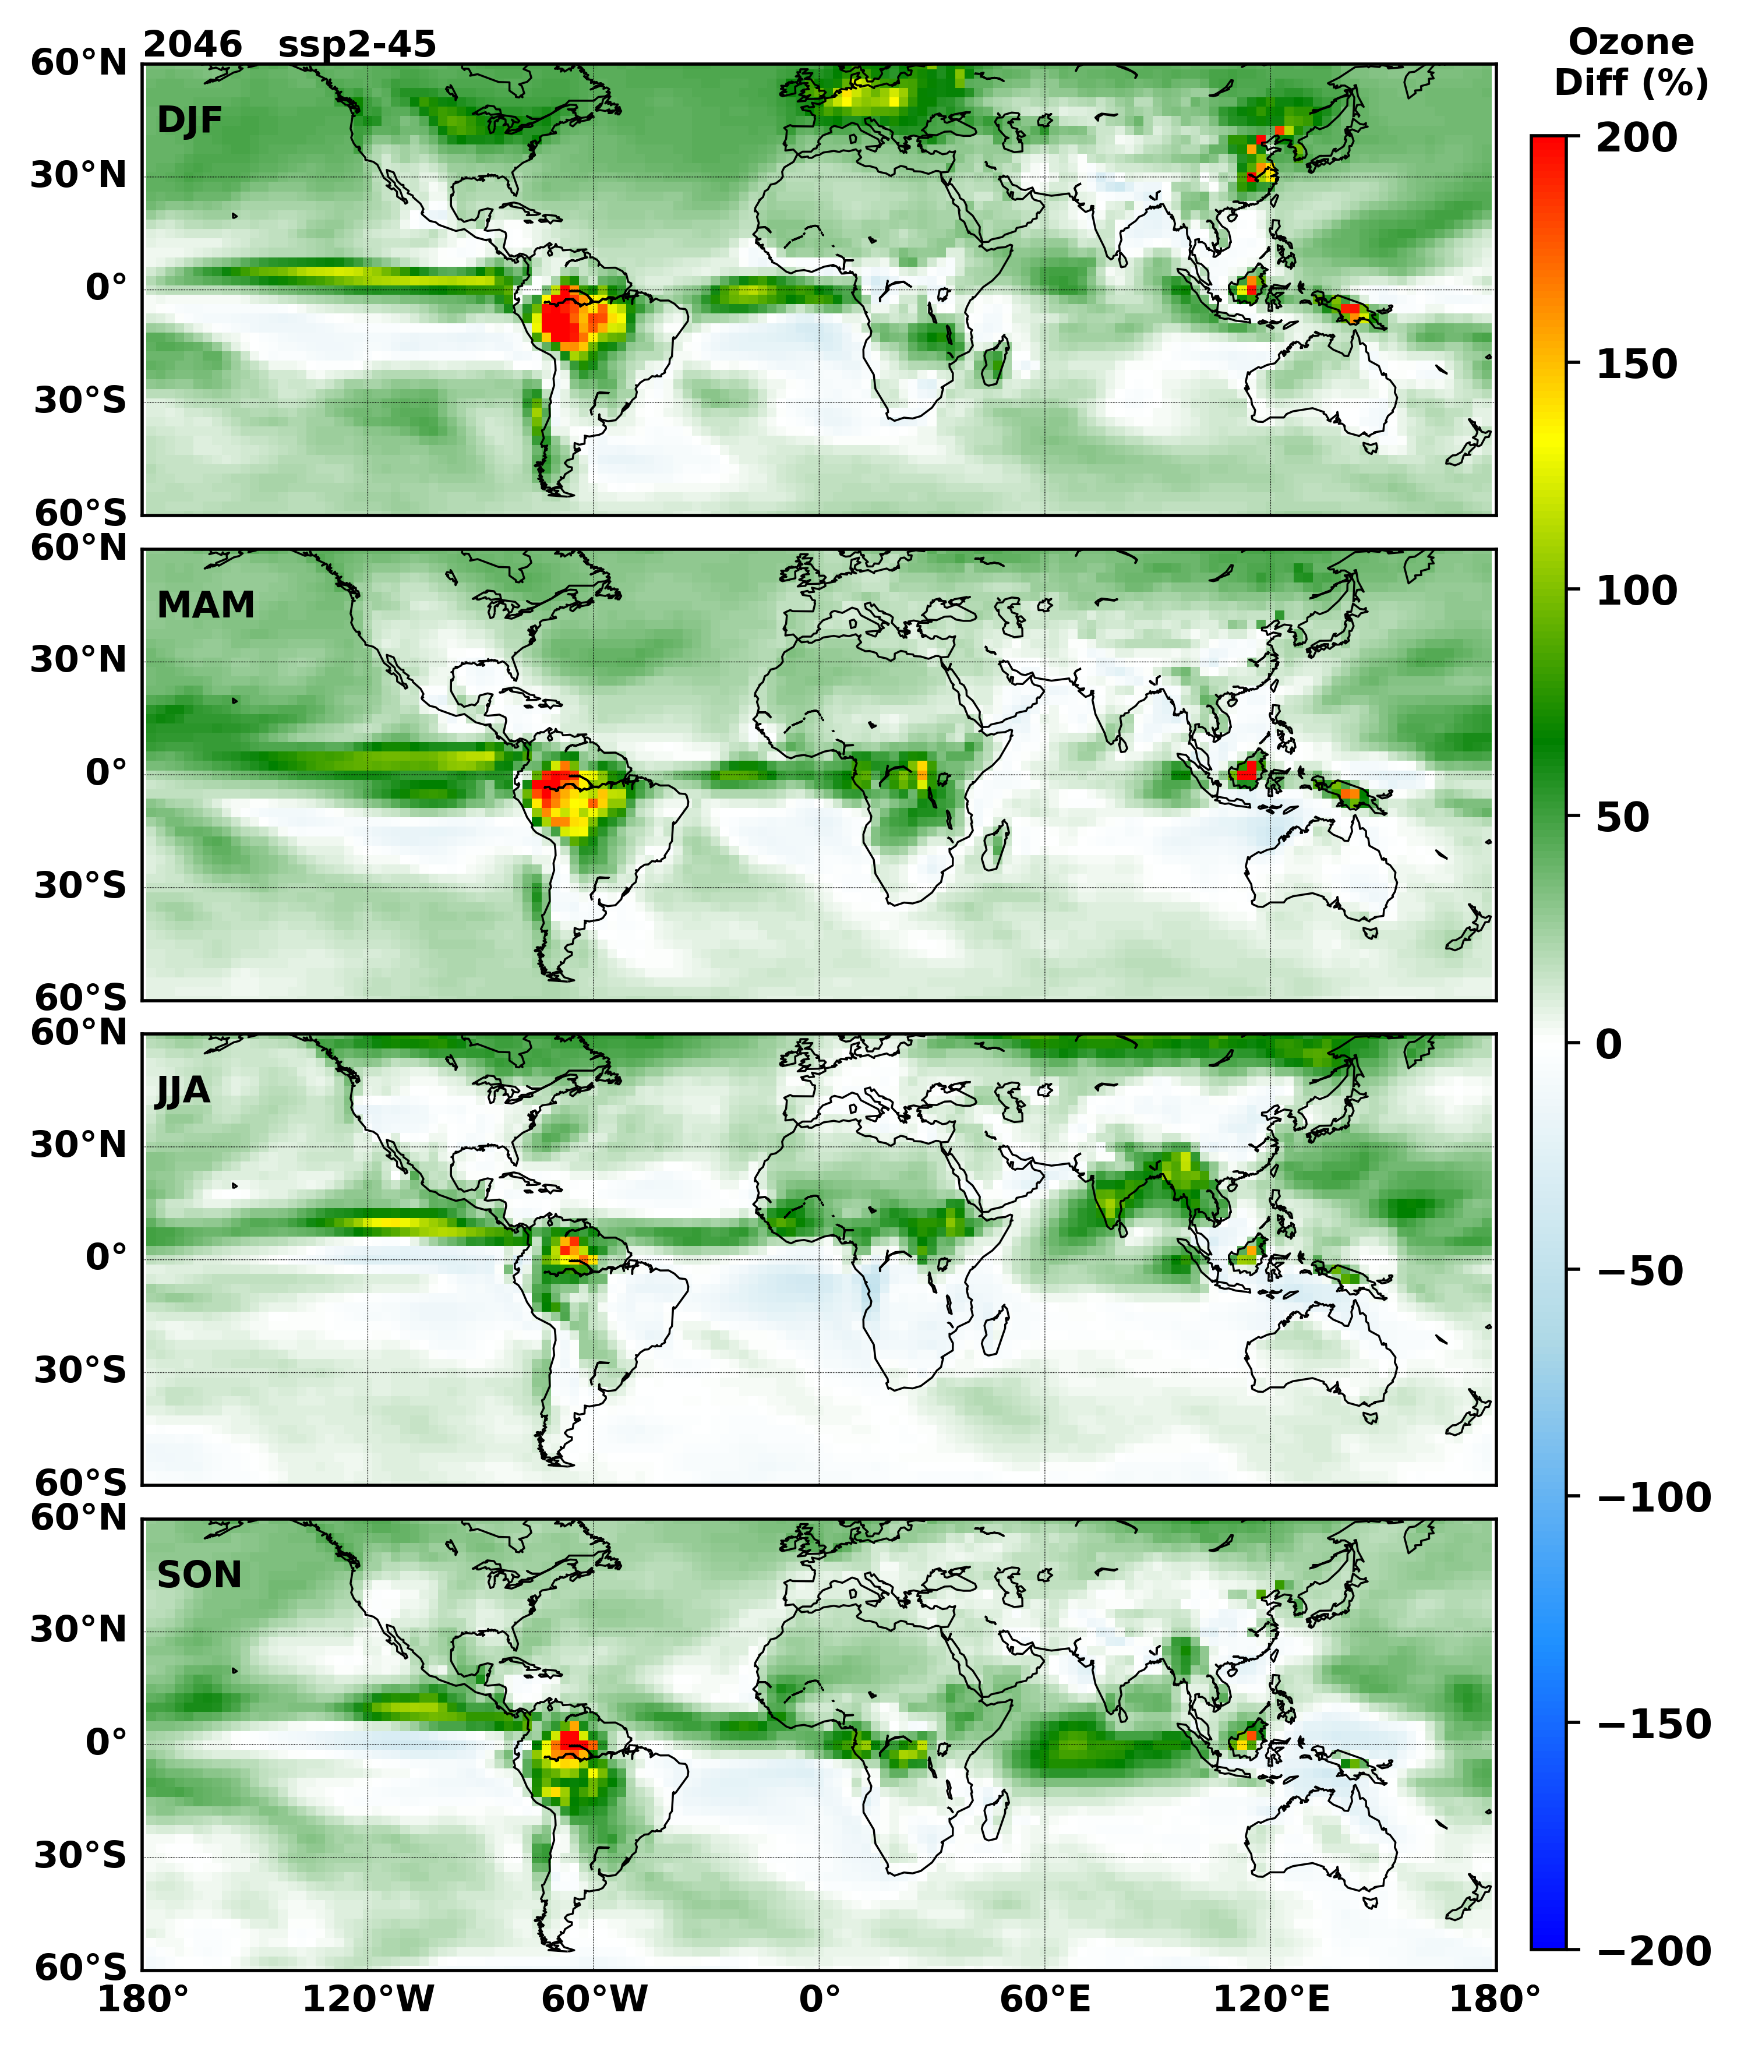


**Supplementary Fig. 21|** The percentage change in surface ozone for the year 2046 when compared to that of 2018 for the SSP 2-4.5 scenario.


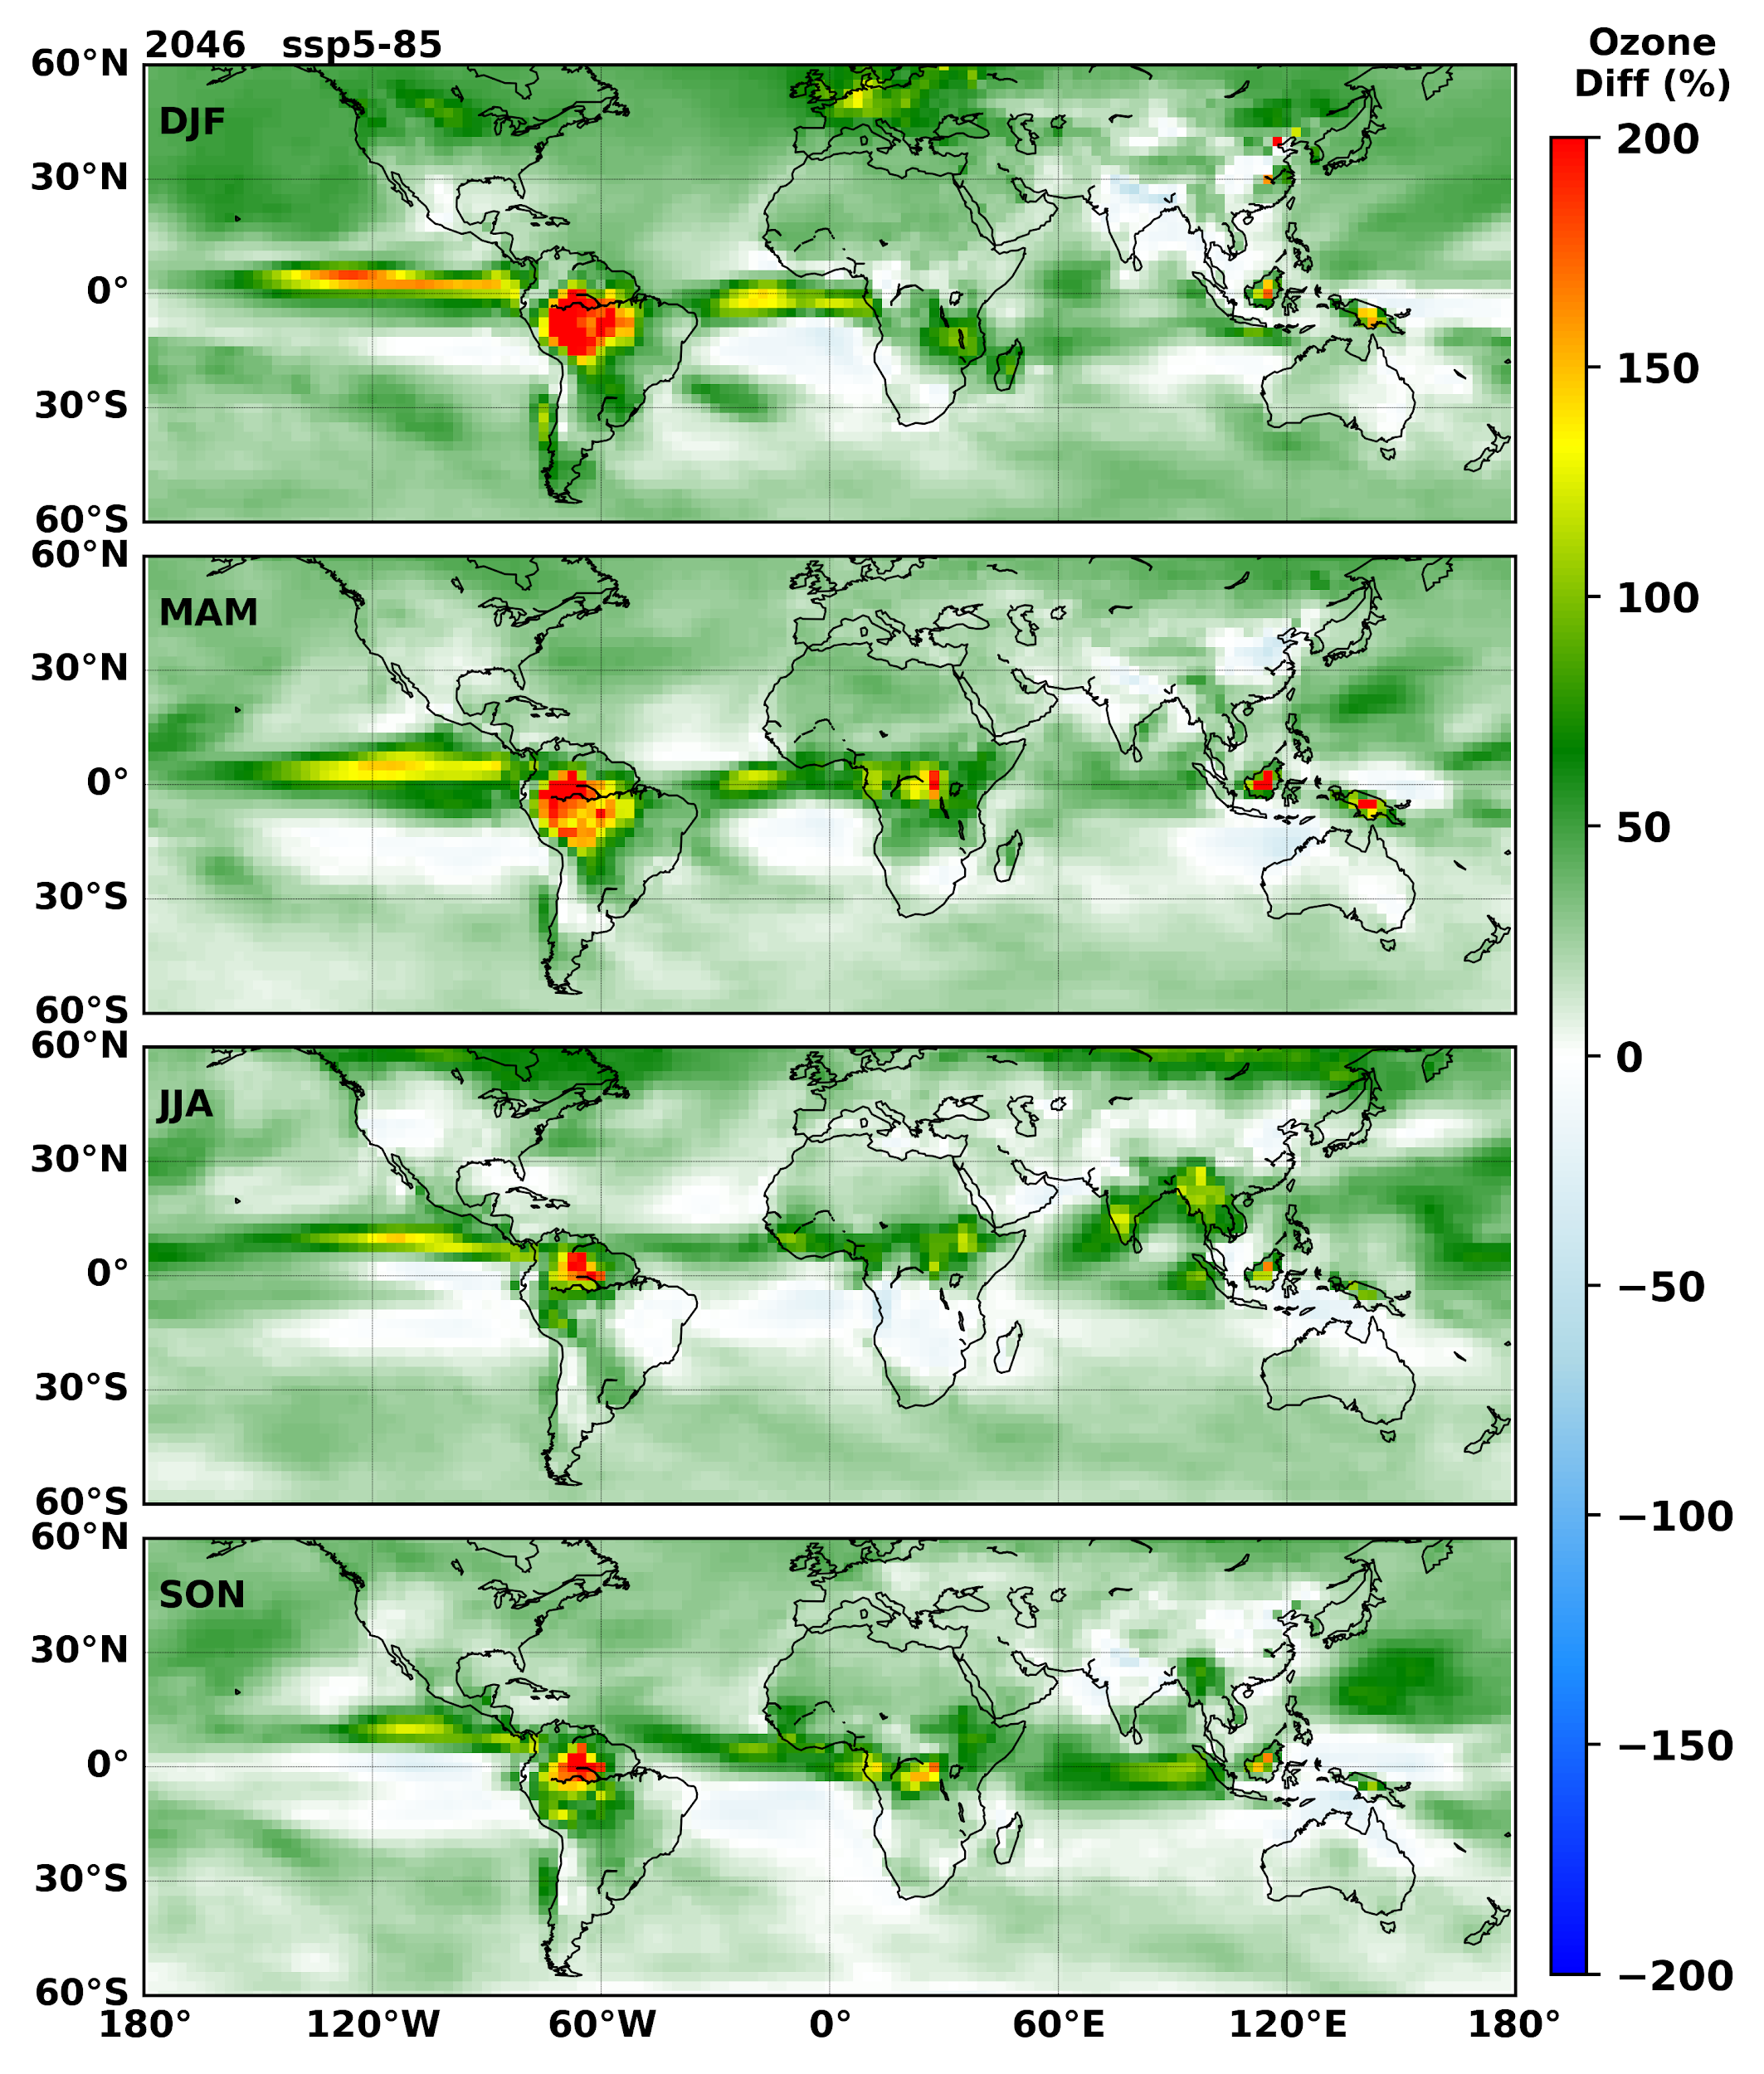


**Supplementary Fig. 22|** The percentage change in surface ozone for the year 2046 when compared to that of 2018 for the SSP 5-8.5 scenario.

**
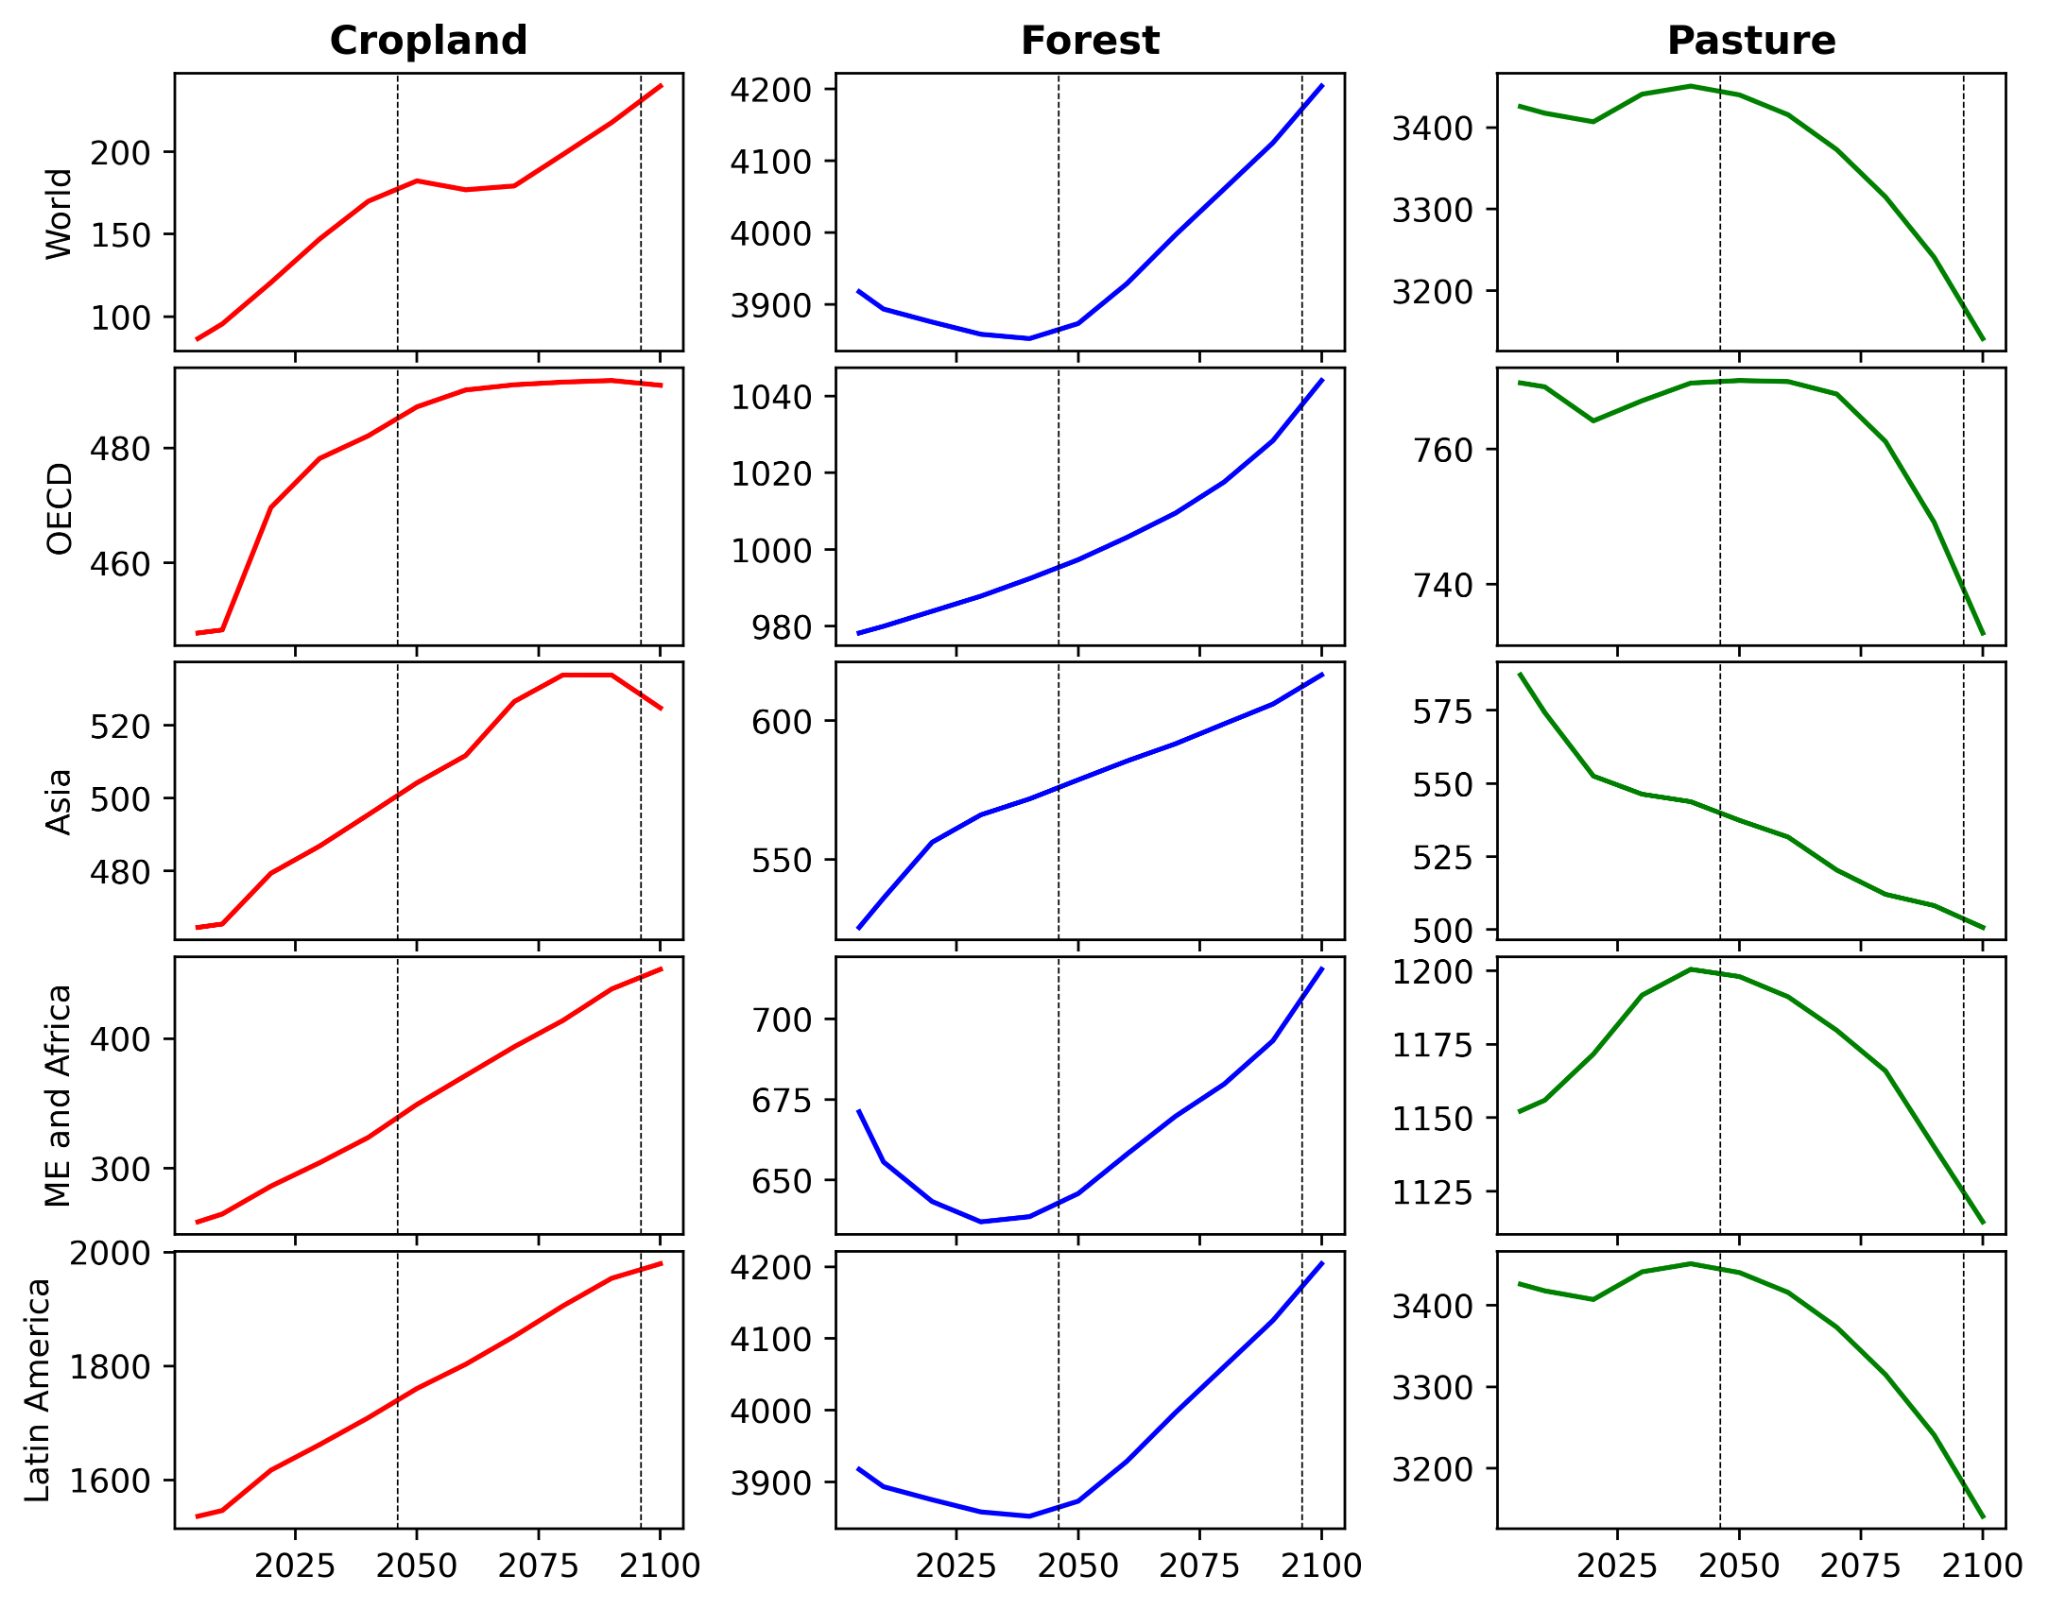
**

**Supplementary Fig. 23|**The land cover changes from the Integrated assessment models (IAMs) for the SSP 2-4.5 scenario for the period from 2005 to 2100.


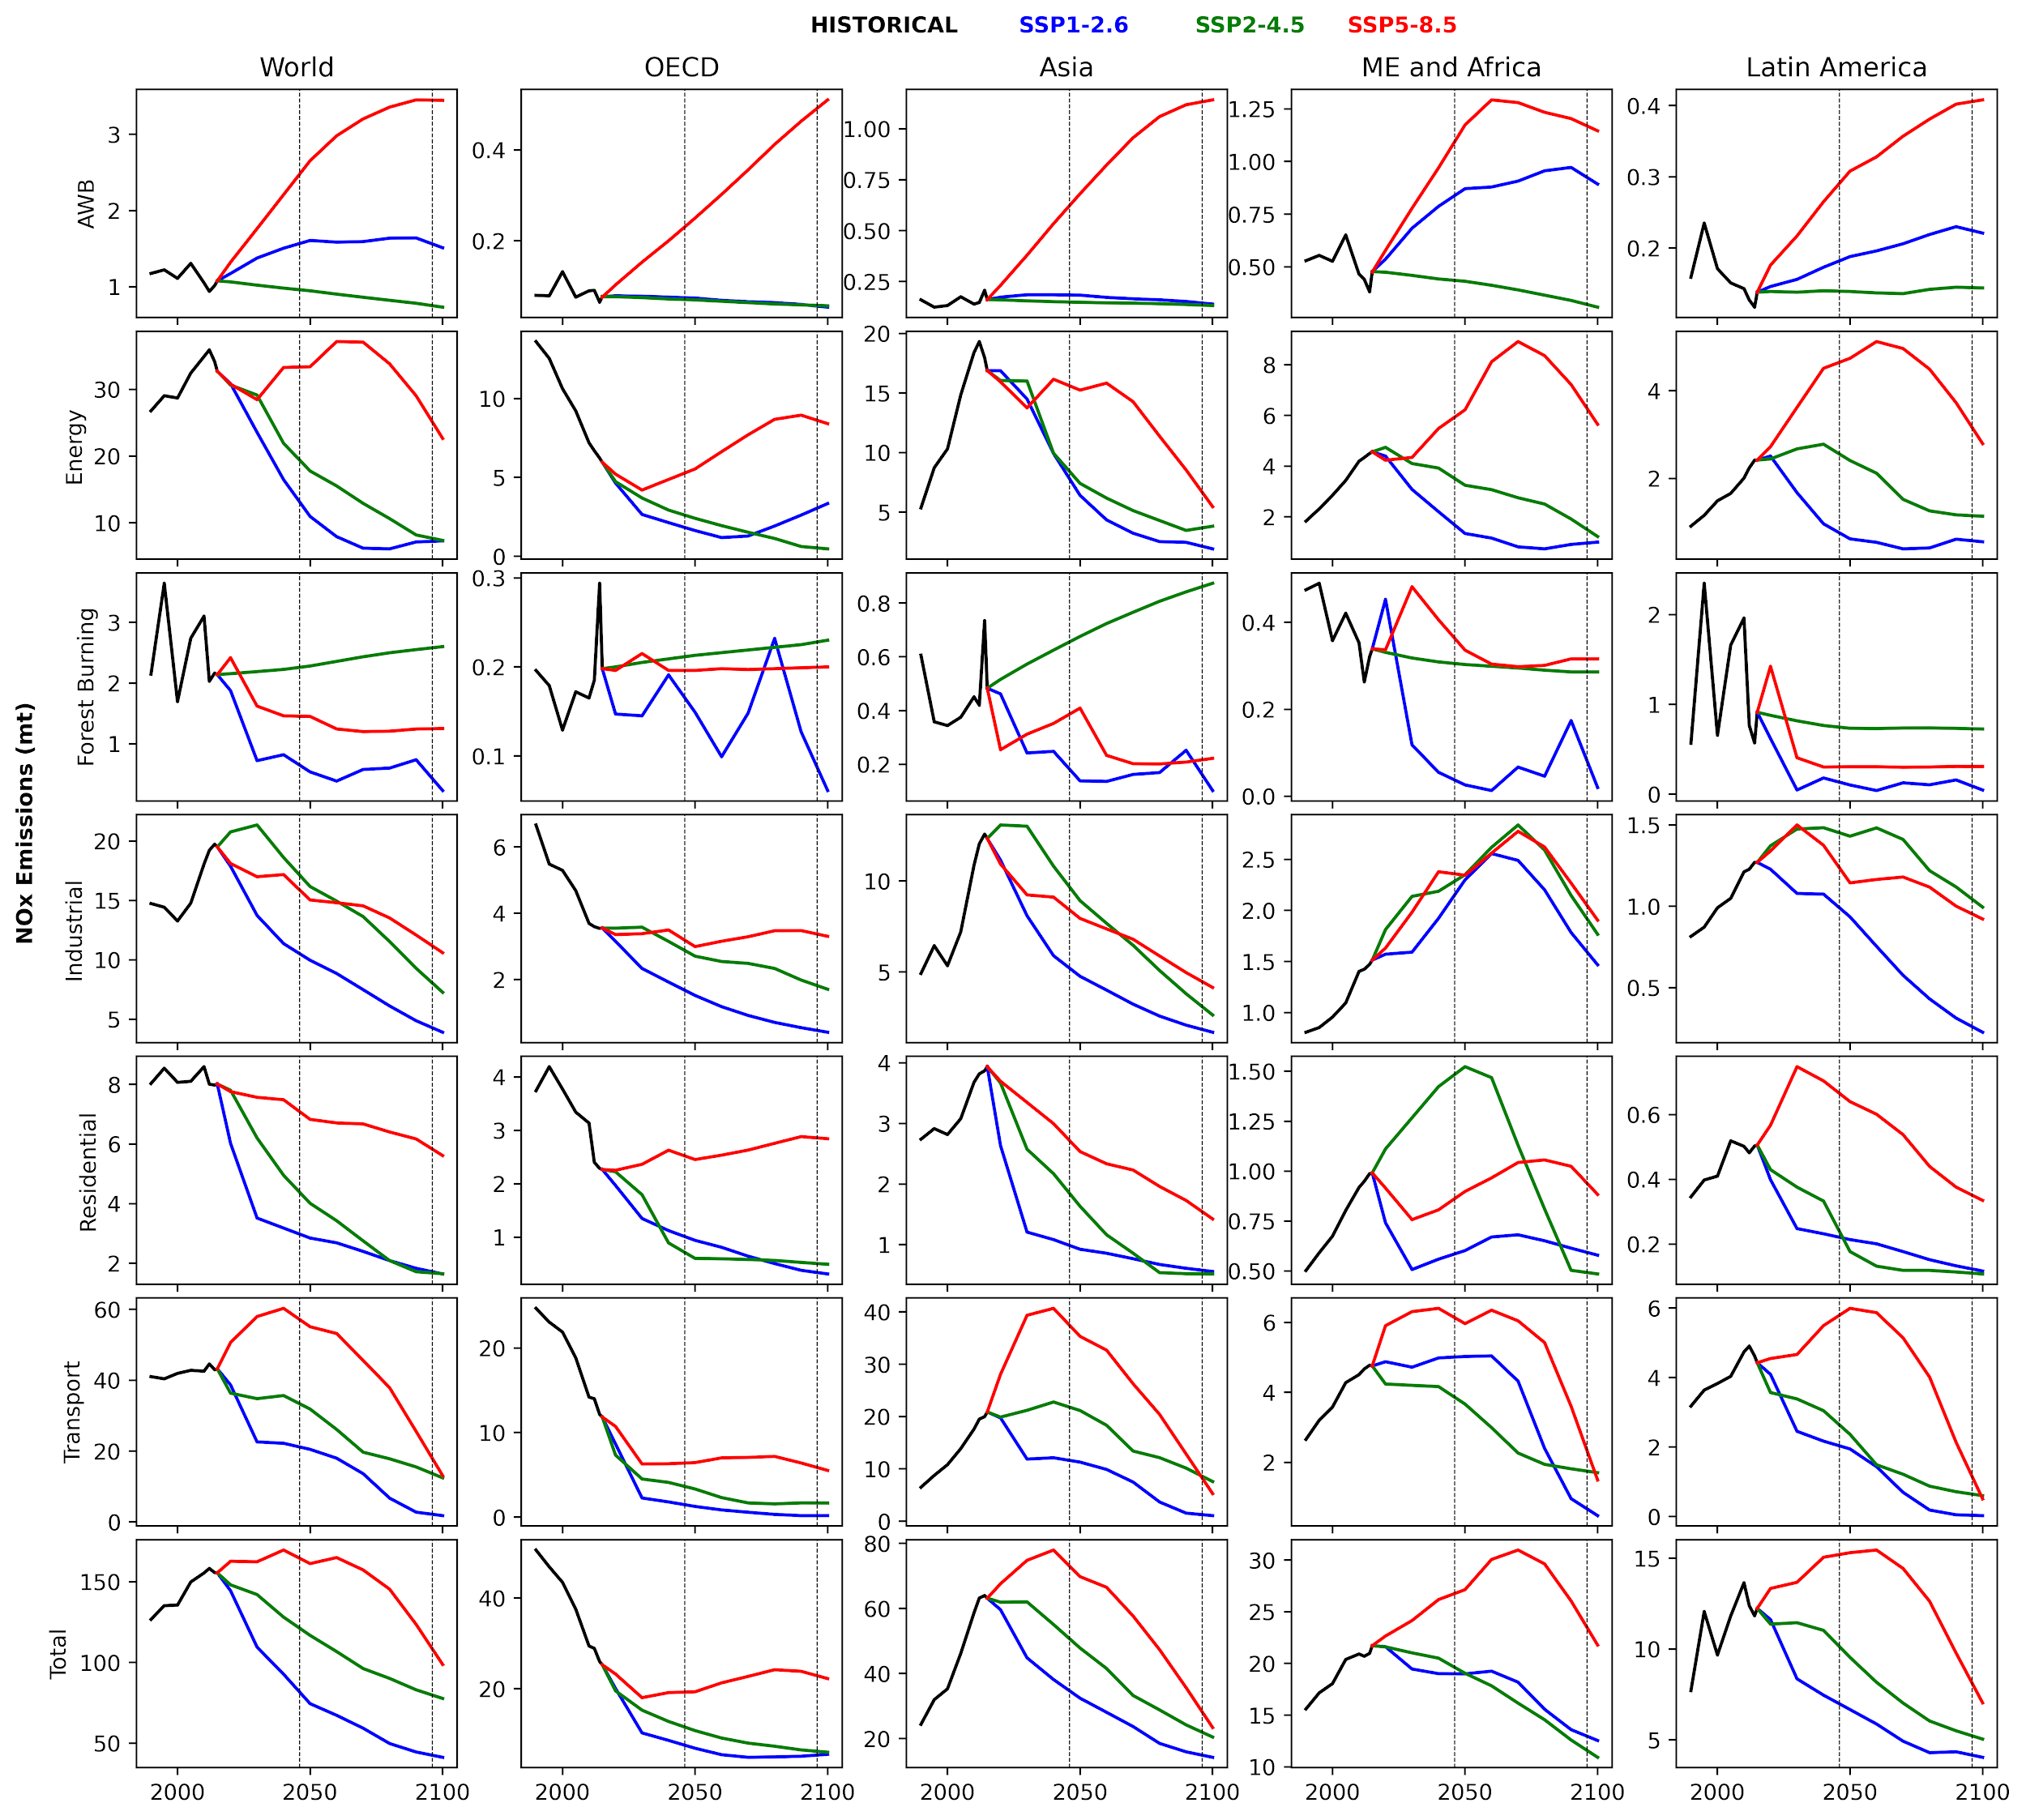


**Supplementary Fig. 24|** The time series of NOx emissions from different sectors in different SSP scenarios for the period from 1980 to 2100

**
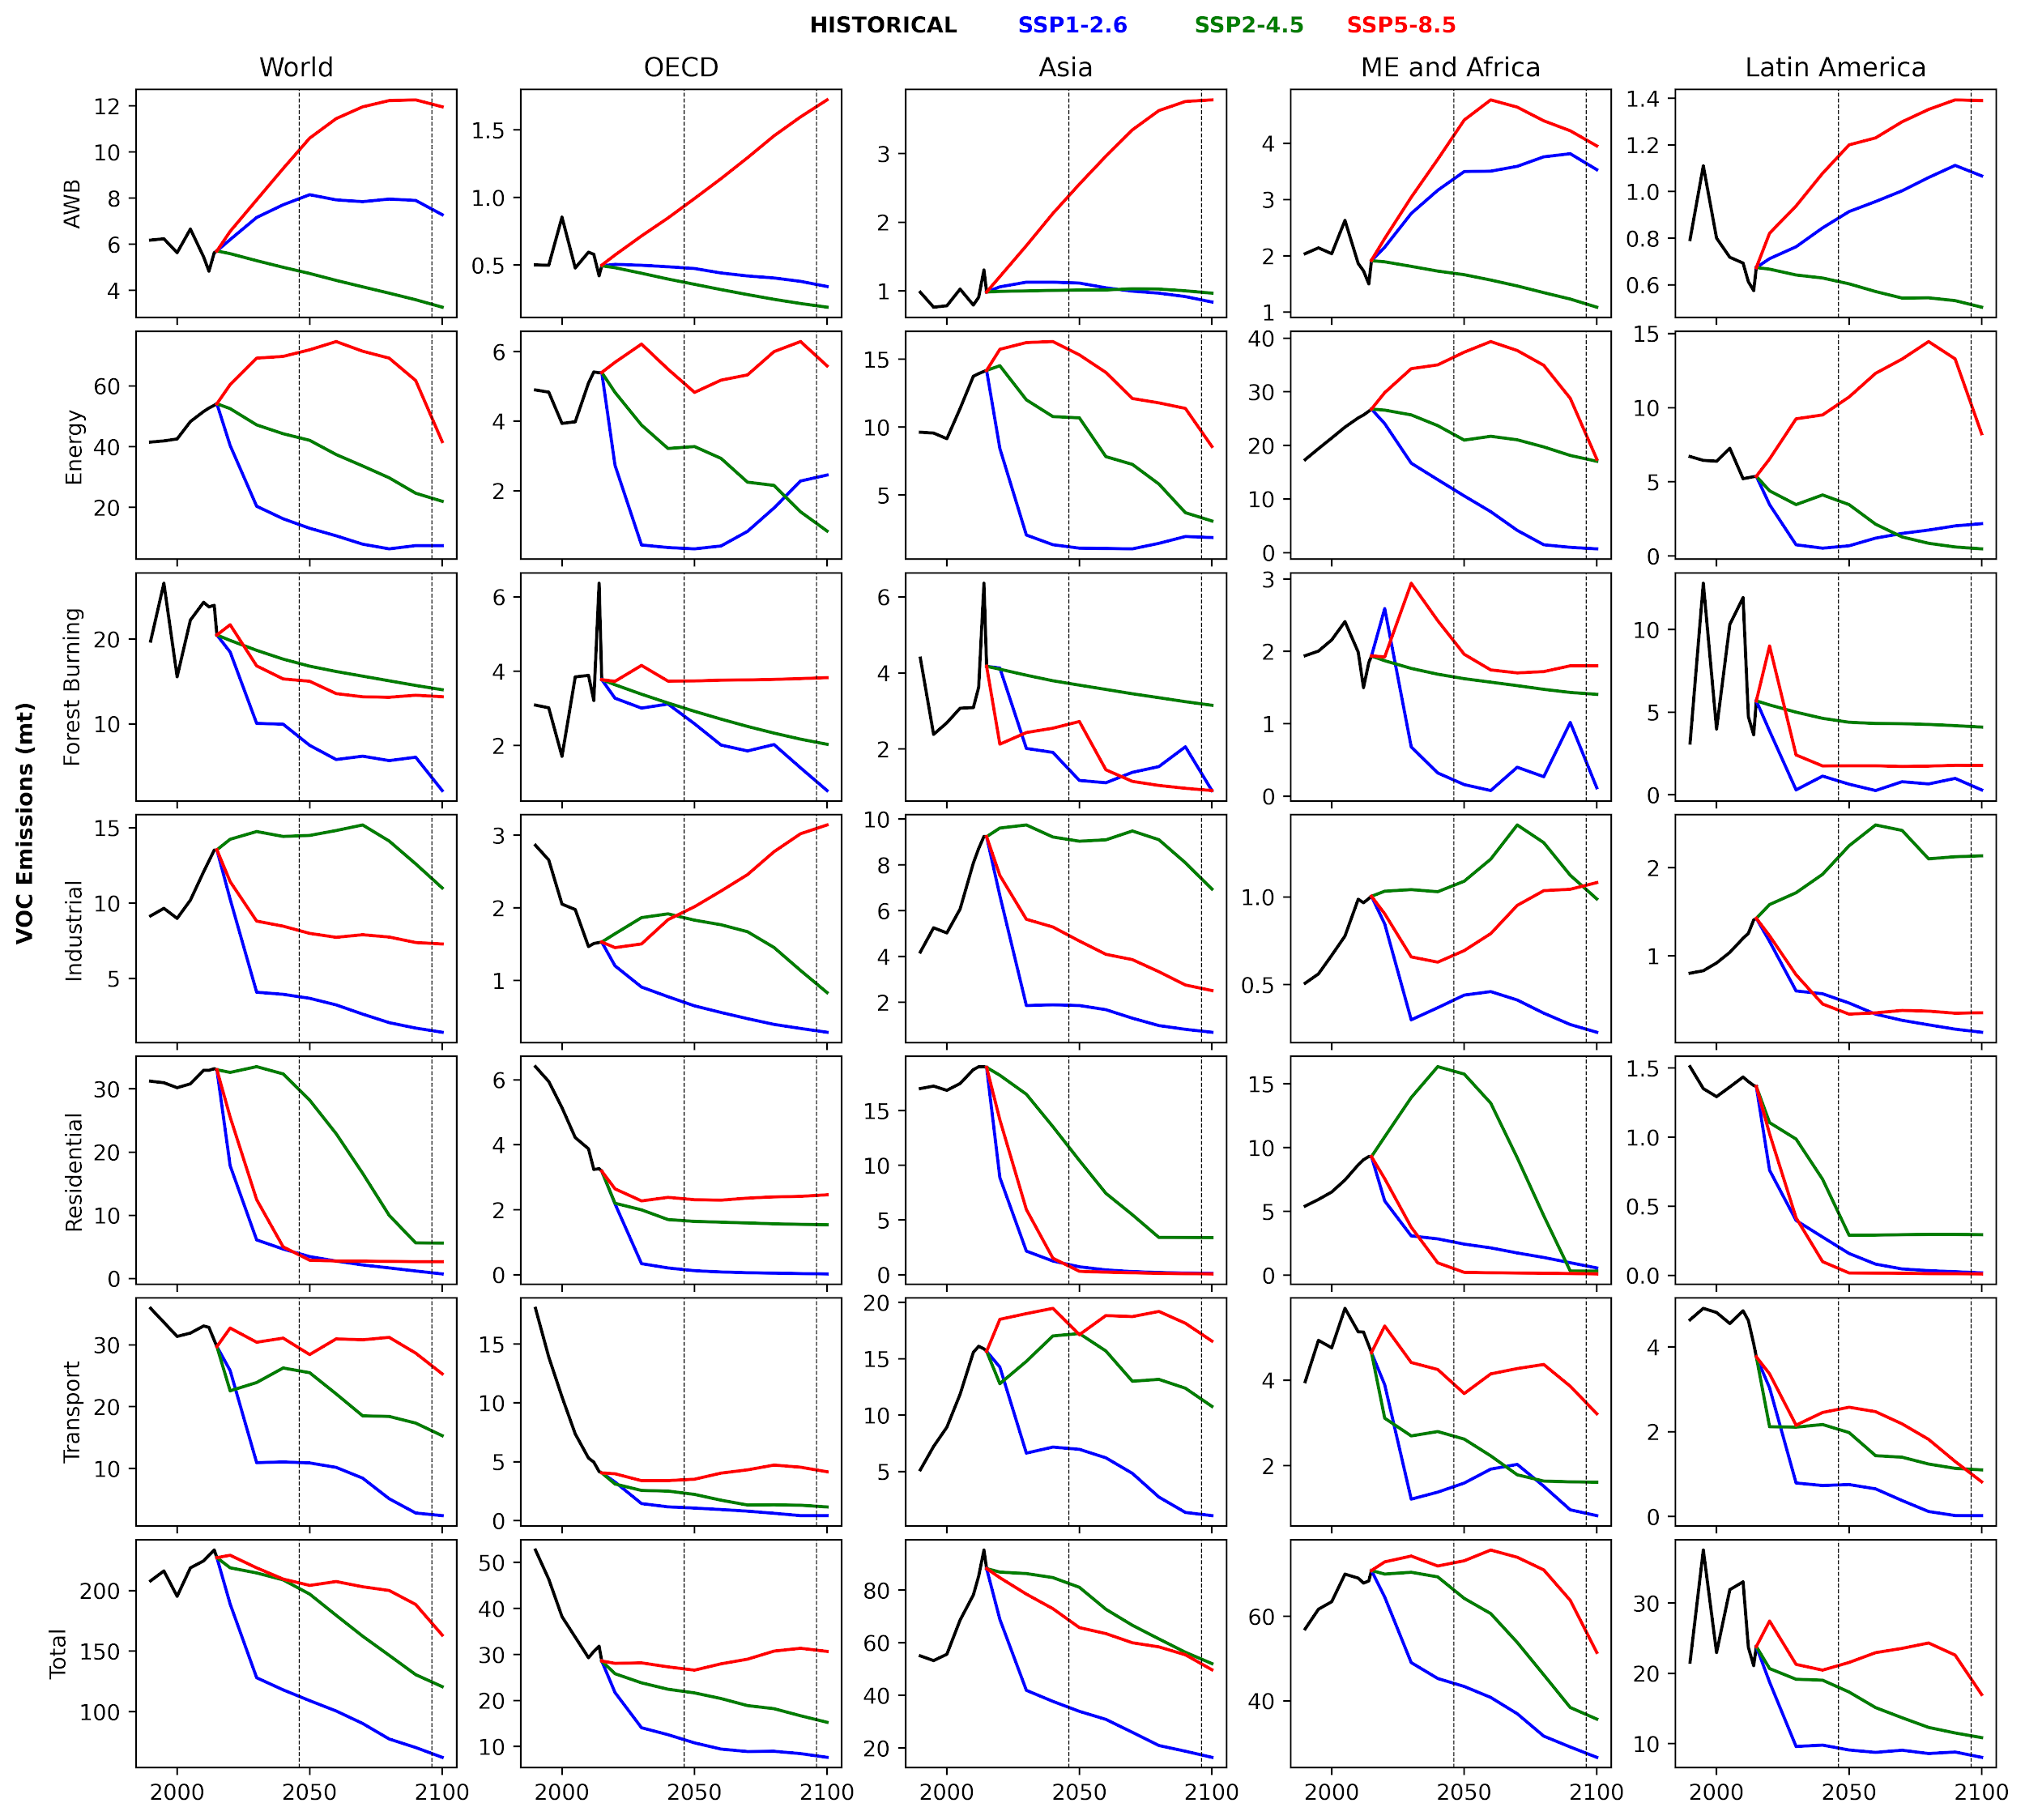
**

**Supplementary Fig. 25|** The time series of VOC emissions from different sectors in different SSP scenarios for the period from 1980 to 2100


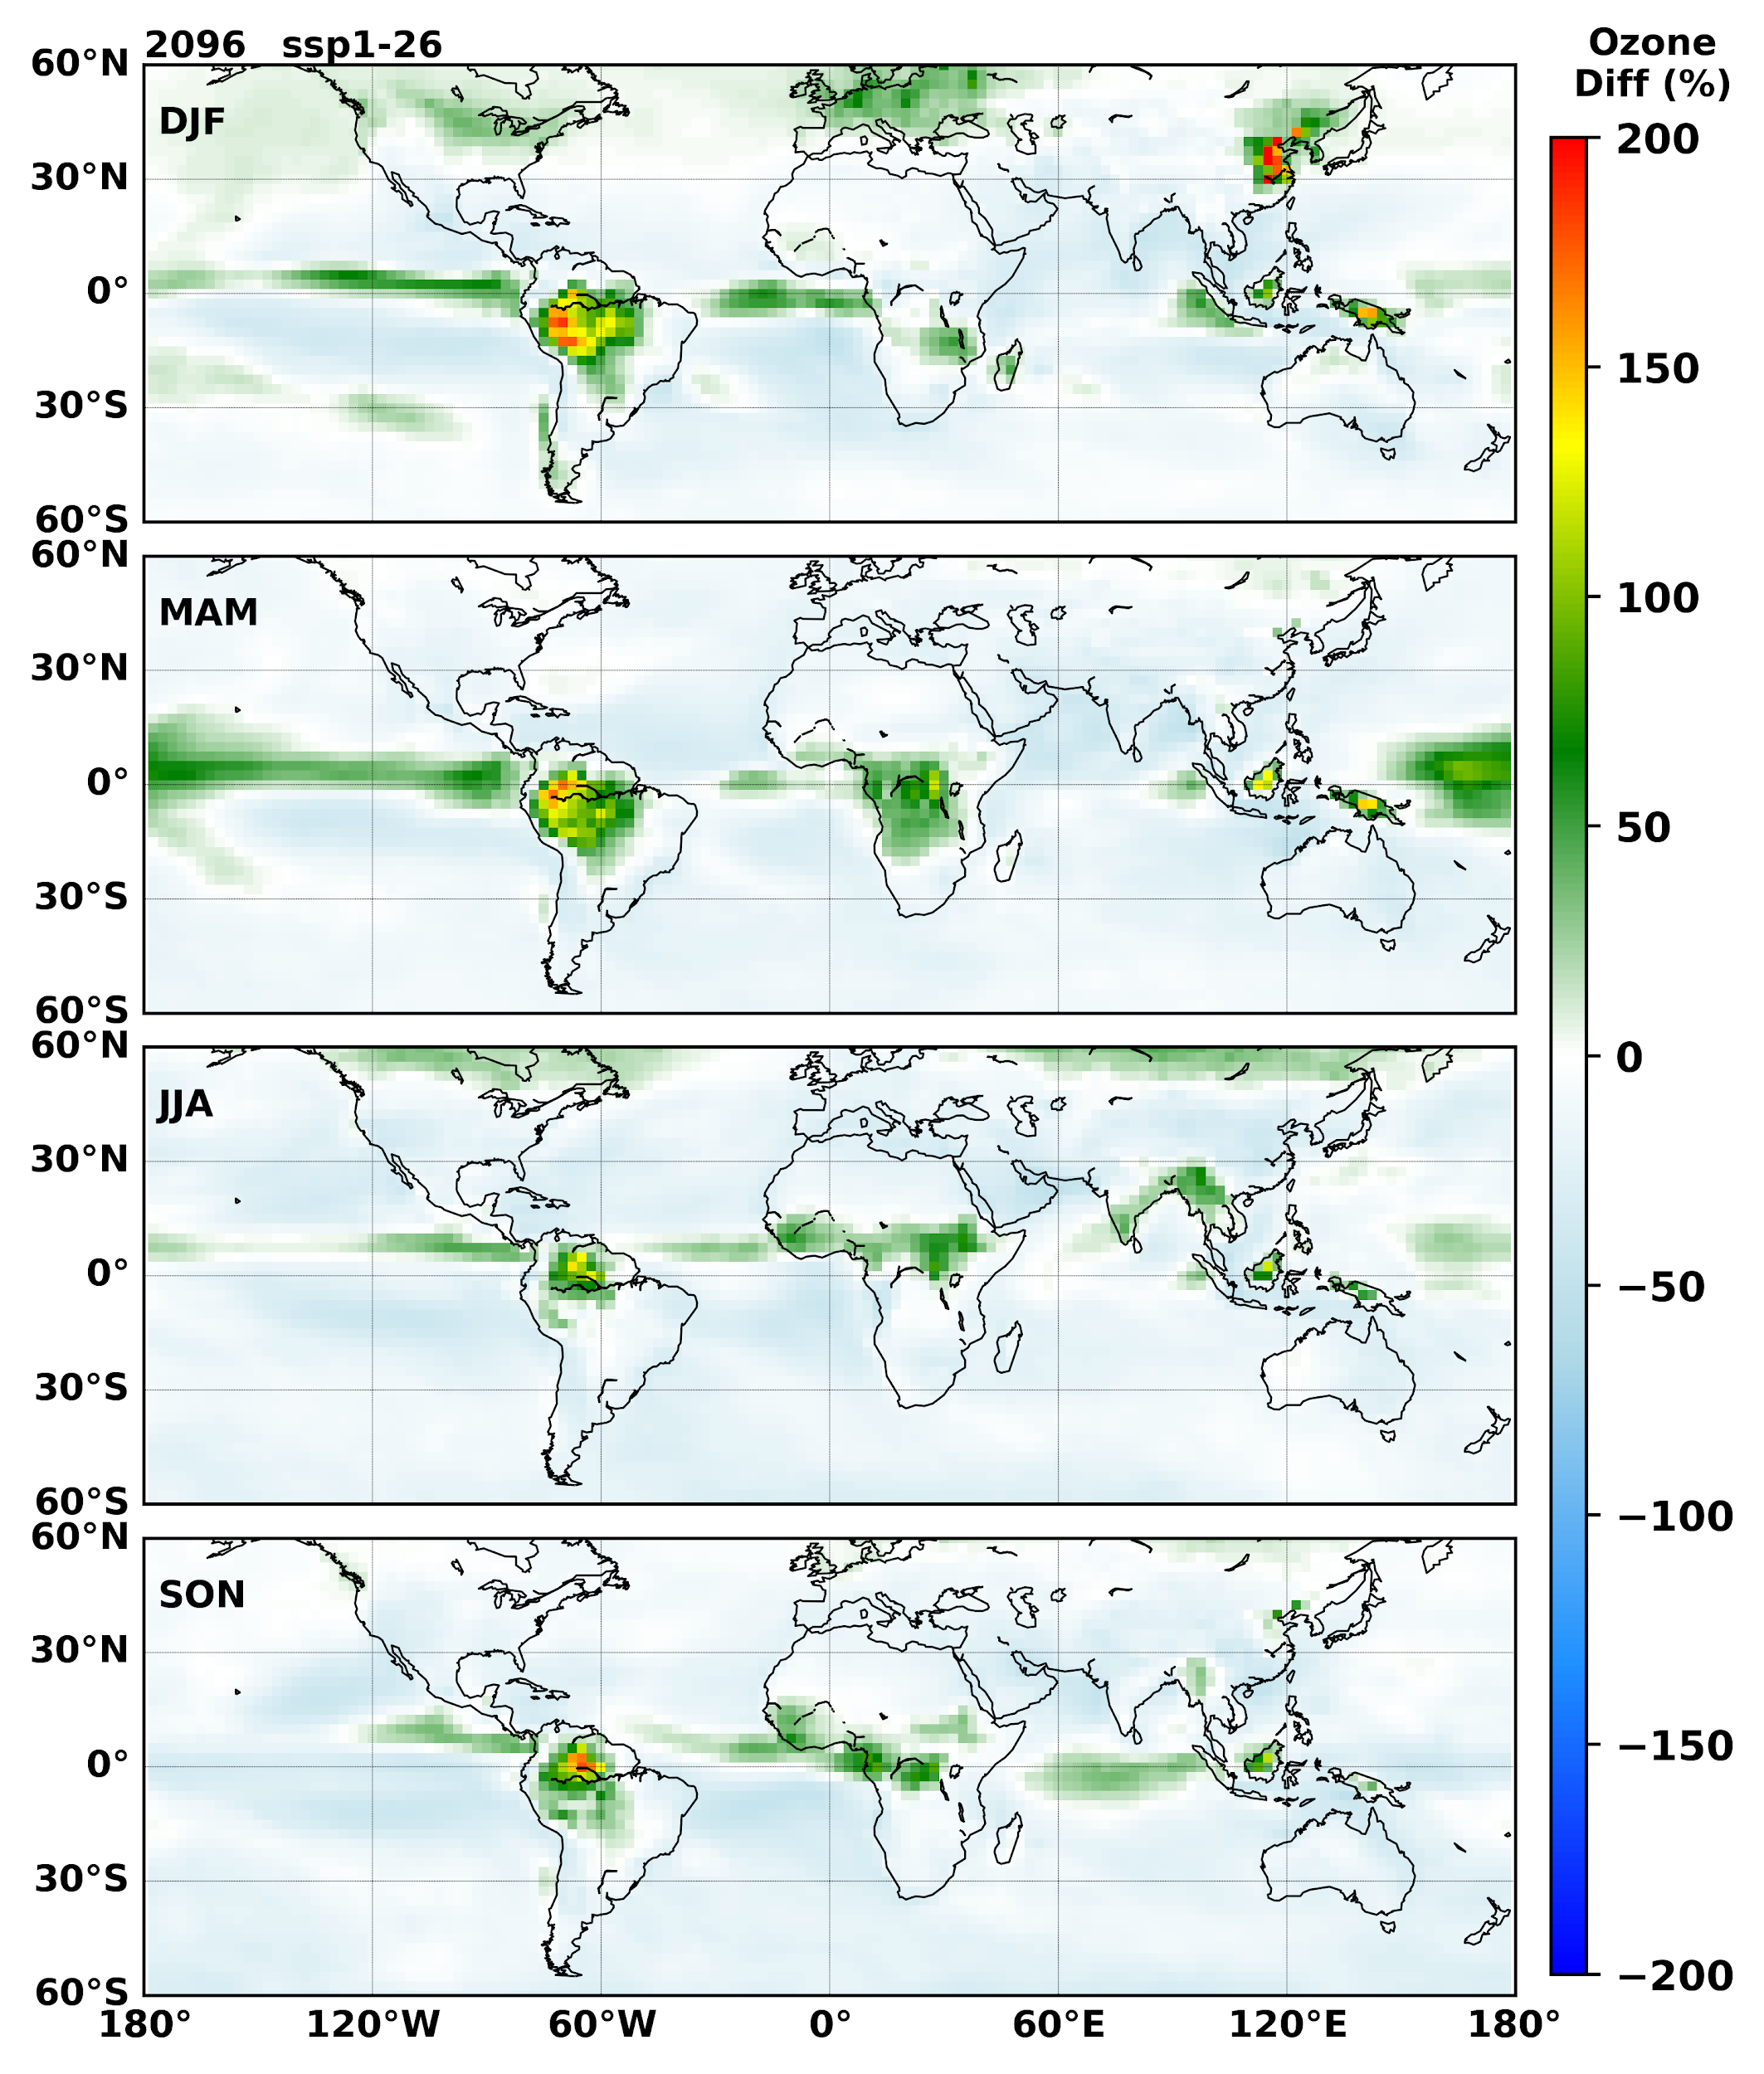


**Supplementary Fig. 26|** The percentage change in surface Ozone for the year 2096 when compared to that of 2018 for the SSP 1-2.6 scenario.


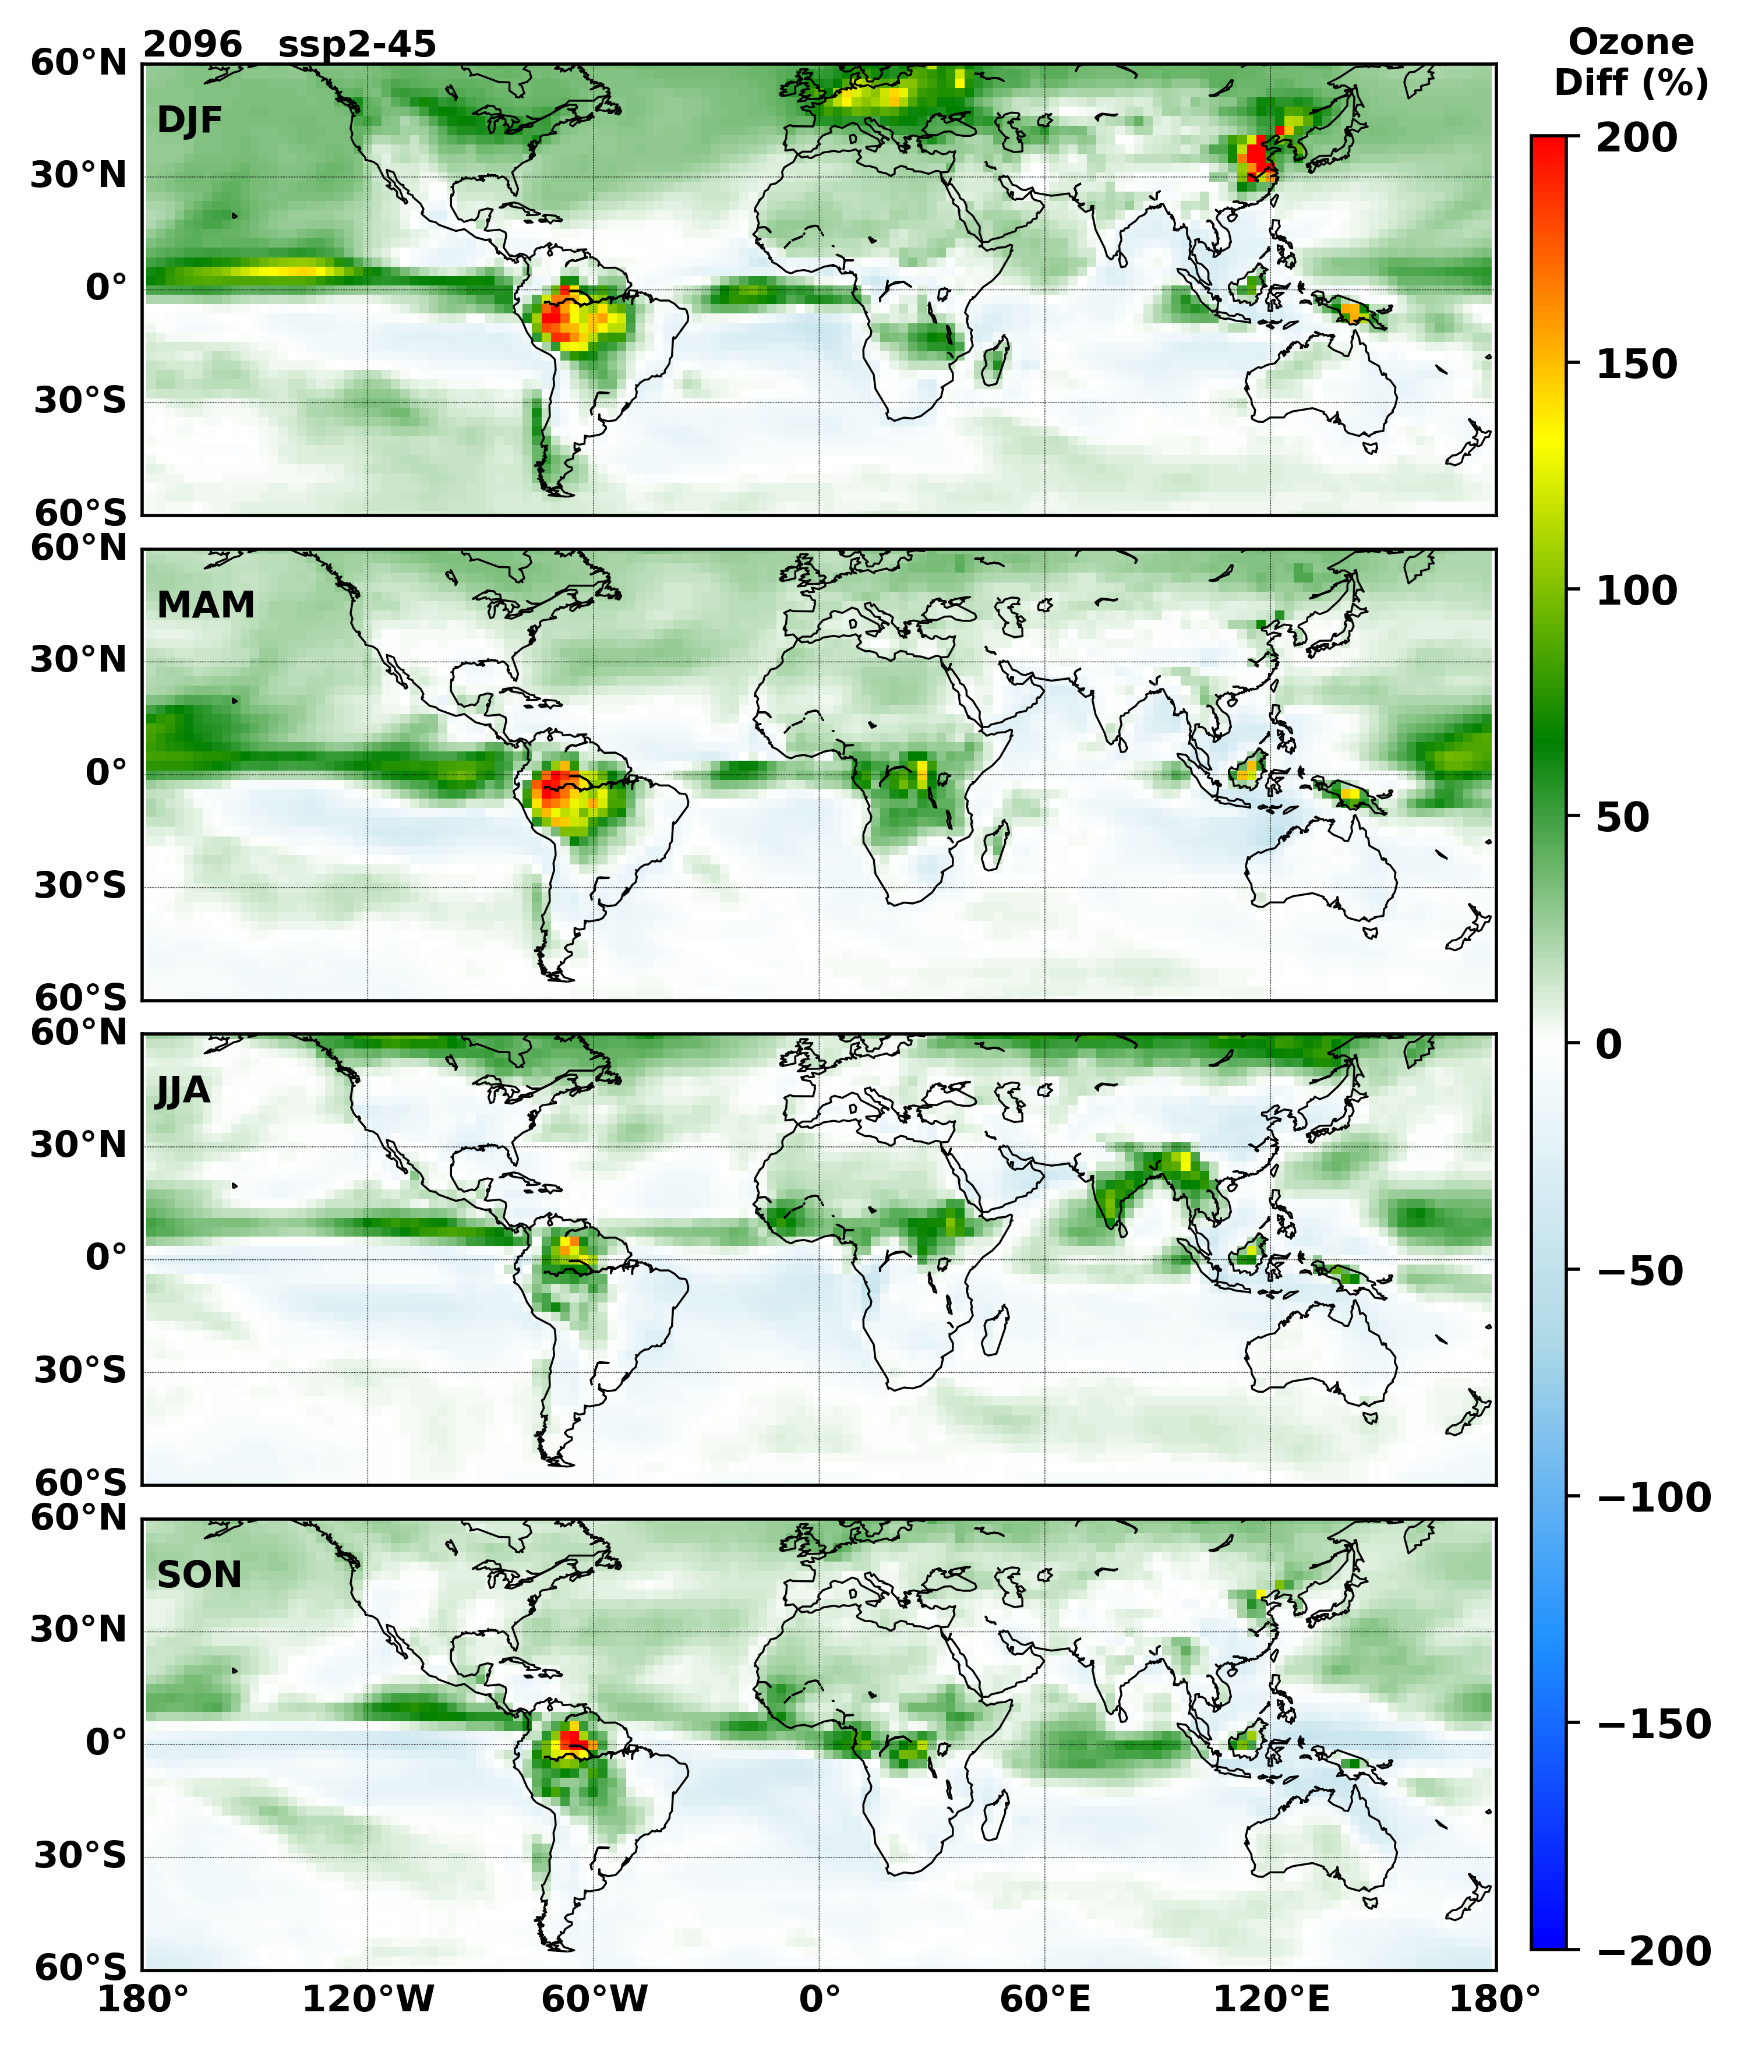


**Supplementary Fig. 27|** The percentage change in surface Ozone for the year 2096 when compared to that of 2018 for the SSP 2-4.5 scenario.


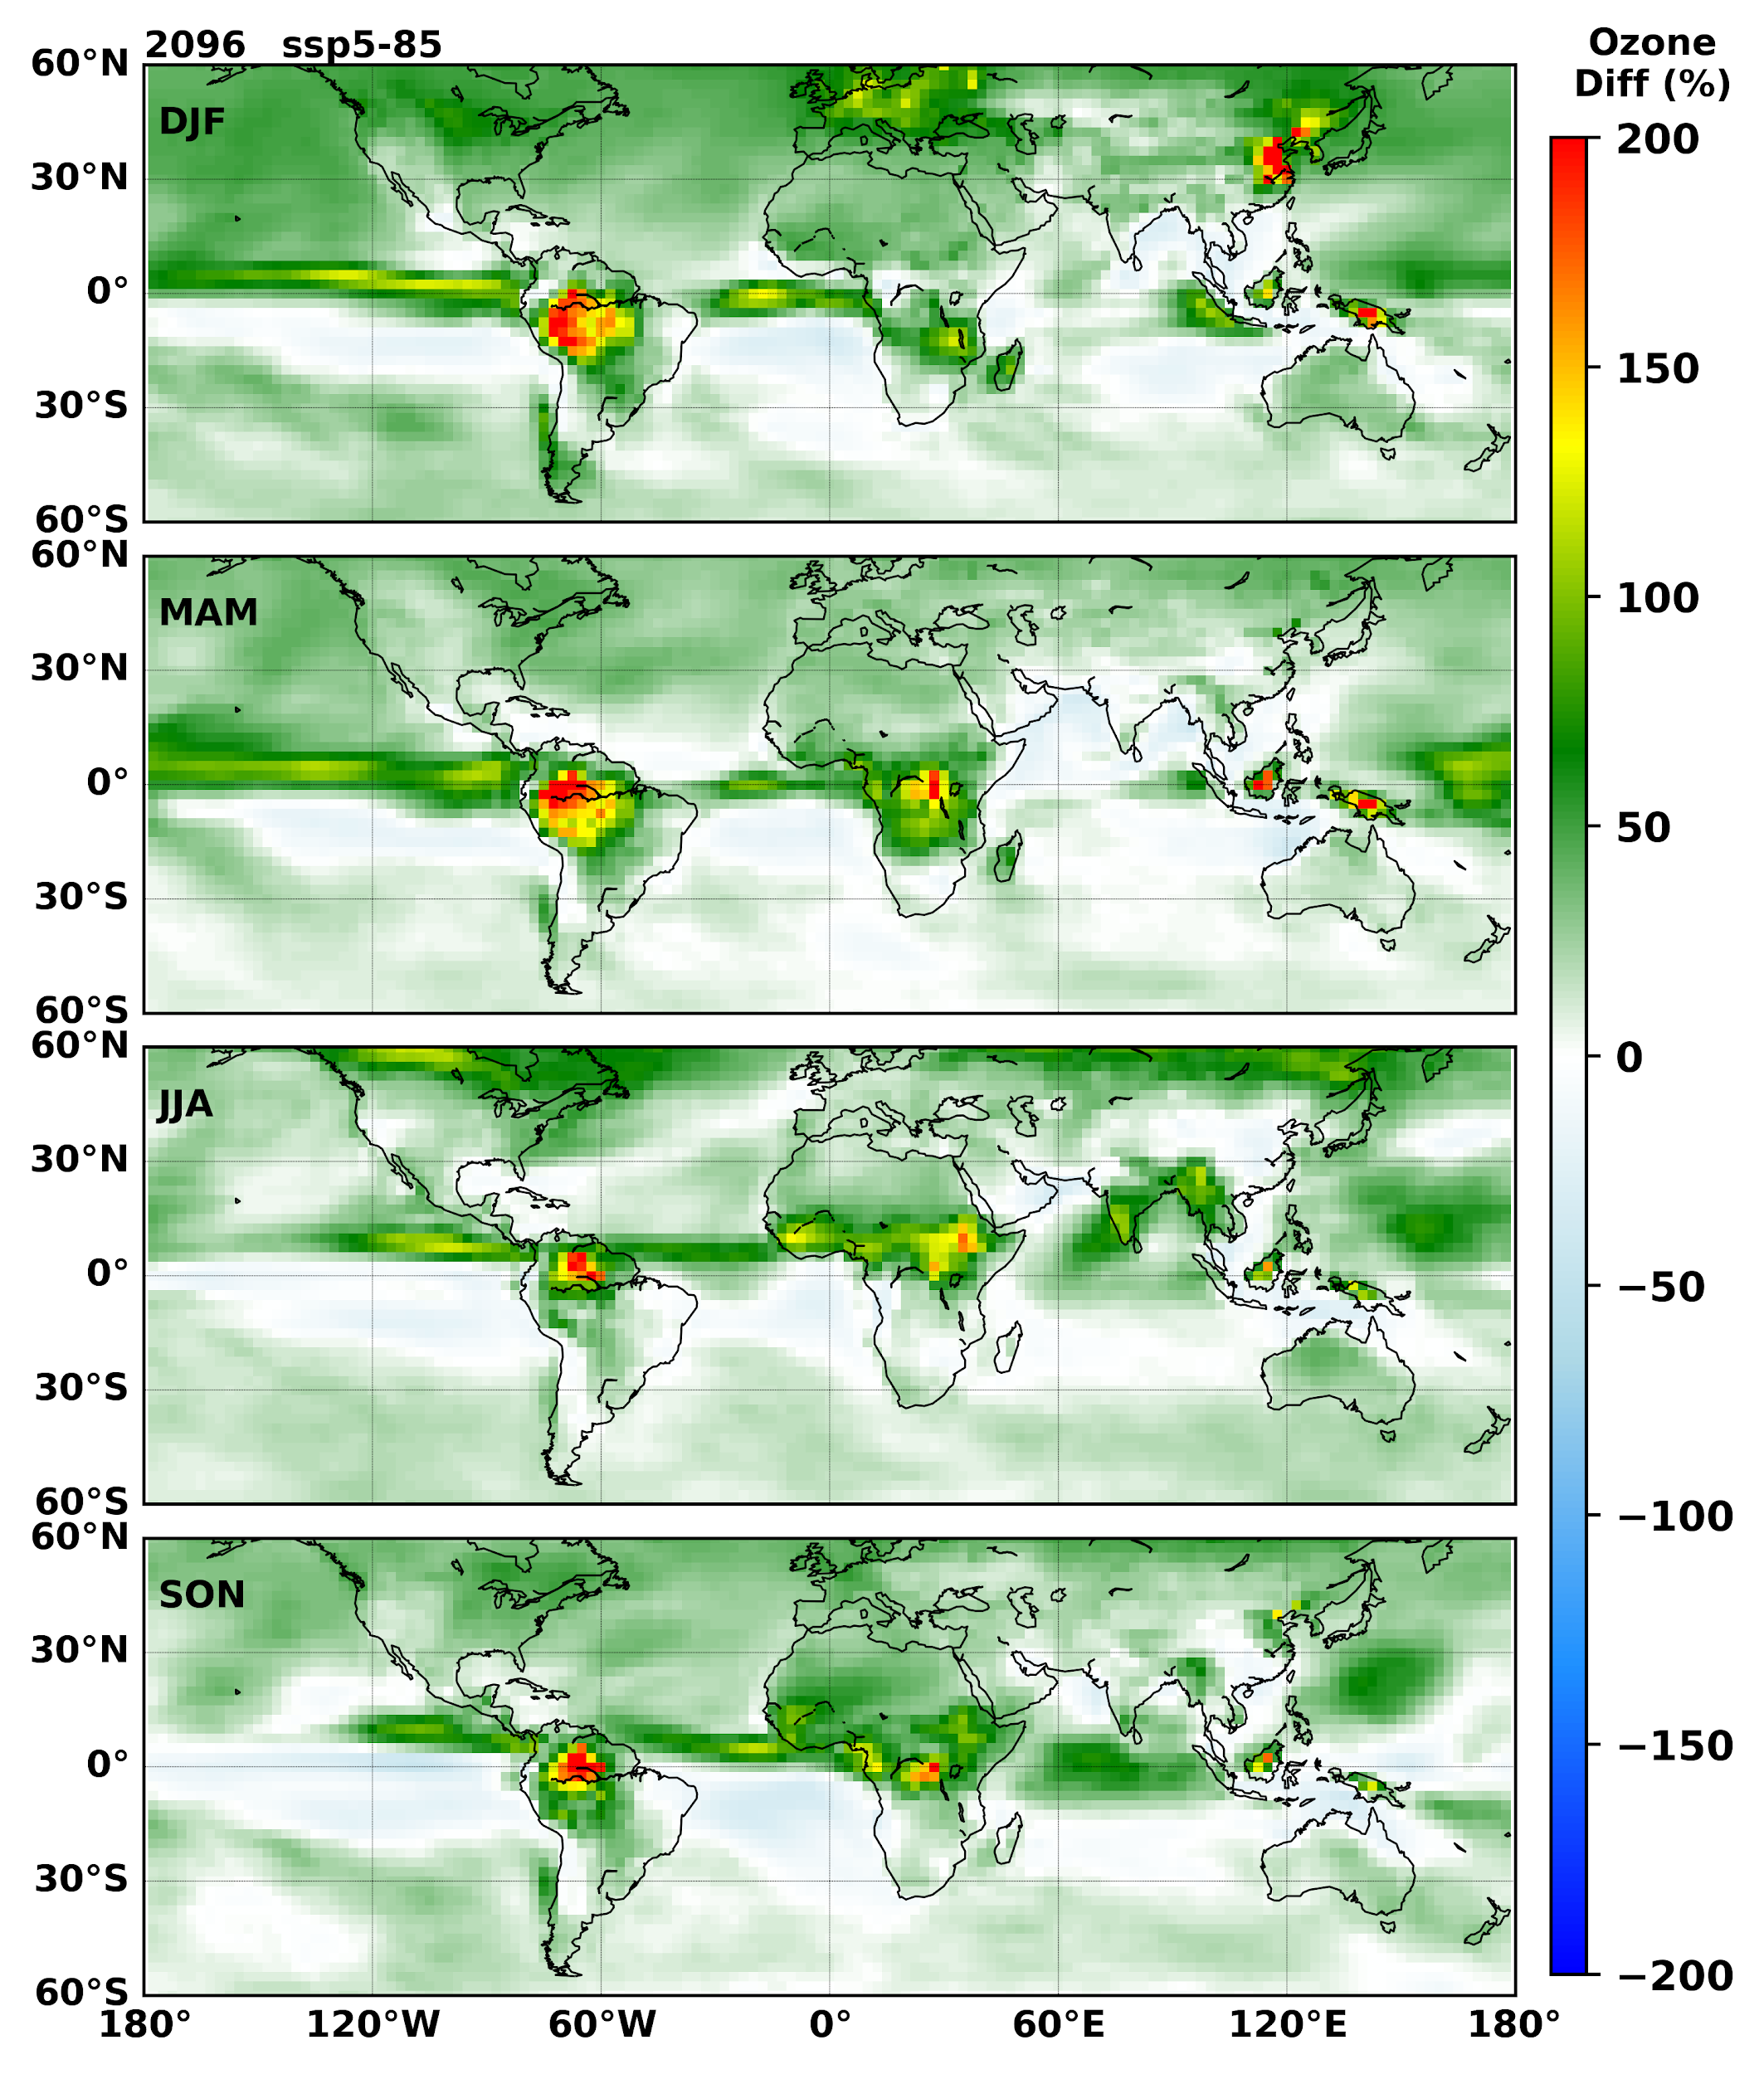


**Supplementary Fig. 28|** The percentage change in surface Ozone for the year 2096 when compared to that of 2018 for the SSP 5-8.5 scenario.

**Table S1:** Total energy demand in EJ/yr from Integrated Assessment Modelling (IAM) models.

| **Sectors** | **2005** | **2010** | **2020** | **2030** | **2040** | **2050** | **2060** | **2070** | **2080** | **2090** | **2100** |
| --- | --- | --- | --- | --- | --- | --- | --- | --- | --- | --- | --- |
| Total Primary Energy | 464 | 501 | 576 | 645 | 707 | 771 | 825 | 875 | 937 | 1005 | 1100 |
| Primary Total Biomass Energy | 48 | 55 | 63 | 62 | 62 | 67 | 73 | 80 | 89 | 100 | 116 |
| Primary Total Coal Energy | 121 | 140 | 138 | 139 | 121 | 111 | 120 | 138 | 157 | 192 | 247 |
| Primary Total Oil Energy | 173 | 173 | 208 | 223 | 234 | 231 | 199 | 153 | 116 | 78 | 52 |
| Primary Total Gas Energy | 100 | 106 | 123 | 157 | 204 | 247 | 283 | 303 | 316 | 297 | 283 |
| Primary Total Fossil Energy | 394 | 419 | 469 | 519 | 558 | 590 | 601 | 595 | 589 | 567 | 582 |
| Secondary Total Electricity | 65 | 75 | 95 | 116 | 139 | 169 | 211 | 251 | 289 | 335 | 394 |
| Secondary Total Gases | 87 | 95 | 108 | 131 | 163 | 197 | 225 | 243 | 272 | 276 | 294 |
| Secondary Total Heat | 13 | 13 | 15 | 19 | 18 | 18 | 21 | 28 | 34 | 42 | 50 |
| Total Energy | 323 | 362 | 439 | 509 | 571 | 618 | 651 | 693 | 745 | 798 | 855 |
| Total Energy Electricity | 54 | 64 | 82 | 102 | 123 | 150 | 187 | 221 | 251 | 286 | 334 |
| Total Energy Gases | 48 | 53 | 56 | 56 | 65 | 79 | 93 | 124 | 181 | 242 | 282 |
| Total Energy Industry | 117 | 135 | 166 | 190 | 211 | 230 | 249 | 265 | 273 | 278 | 282 |
| Total Energy Residential | 120 | 131 | 153 | 173 | 189 | 205 | 226 | 249 | 274 | 302 | 333 |
| Total Energy Transport | 87 | 96 | 121 | 147 | 170 | 182 | 177 | 179 | 198 | 218 | 240 |
